# Supplementary material for: Synthesis of seven-membered lactones by regioselective and stereoselective iodolactonization of electron-deficient olefins
Source: Royal Society of Chemistry journal article supplement (doi:10.1039/c9cc10080f), 2020-01-01
Supplement: c9cc10080f1.pdf [file c9cc10080f1.pdf]

## *Supporting Information*

### **Synthesis of seven-membered lactones by regioselective and stereoselective iodolactonization of electron-deficient olefins**

Pan-Ting Tang,<sup>a,†</sup> You-Xiang Shao,<sup>b,‡</sup> Liang-Neng Wang,<sup>a</sup> Yi Wei,<sup>a</sup> Ming Li,<sup>a</sup> Ni-Juan Zhang,<sup>a</sup> Xiao-Peng Luo,<sup>a</sup> Zhuofeng Ke,<sup>b</sup> Yue-Jin Liu<sup>\*a</sup> and Ming-Hua Zeng<sup>\*ac</sup>

<sup>a</sup>Hubei Collaborative Innovation Center for Advanced Chemical Materials, Ministry of Education Key Laboratory for the Synthesis and Application of Organic Functional Molecules, and College of Chemistry and Chemical Engineering, Hubei University, Wuhan, 430062, China. E-mail: liuyuejin@hubei.edu.cn

<sup>b</sup>School of Materials Science and Engineering, PCFM Lab, Sun Yat-sen University, Guangzhou 510275, China. E-mail: kezhf3@mail.sysu.edu.cn.

<sup>c</sup>Department Key Laboratory for the Chemistry and Molecular Engineering of Medicinal Resources, School of Chemistry and Pharmaceutical Sciences, Guangxi Normal University, Guilin, 541004, China. E-mail: zmh@mailbox.gxnu.edu.cn

(Pan-Ting Tang<sup>a,†</sup> and You-Xiang Shao<sup>b,‡</sup> contributed equality this work.)

#### **Contents**

|                                                                   |            |
|-------------------------------------------------------------------|------------|
| <b>1. General Information.....</b>                                | <b>S2</b>  |
| <b>2. Experimental Procedures .....</b>                           | <b>S3</b>  |
| 2.1 General procedure for preparation of substrates 1 and 3 ..... | S3         |
| 2.2 Optimization of Conditions .....                              | S5         |
| 2.3 General Procedures for Products .....                         | S6         |
| 2.4 General Procedures for Synthetic Application .....            | S24        |
| 2.5 General Procedures for Mechanistic Experiments .....          | S26        |
| <b>3. DFTCalculation .....</b>                                    | <b>S28</b> |
| 3.1 Computational details.....                                    | S28        |
| 3.2 Optimized cartesian coordinates (xyz) .....                   | S29        |
| <b>4. References .....</b>                                        | <b>S34</b> |
| <b>5. NMR Spectra.....</b>                                        | <b>S35</b> |
| <b>6. Crystallographic Data .....</b>                             | <b>S69</b> |

## 1. General Information

Unless otherwise noted, materials were purchased from Alfa-Aesar, Adamas, Aldrich Inc. and Energy Chemical and used as received. All reactions were carried out in a flame dried, sealed tube under an atmosphere of air. Analytical thin layer chromatography (TLC) was performed on silica gel plates with F-254 indicator and compounds were visualized by irradiation with UV light. Prepared column chromatography was performed on silica gel 60N (spherical and neutral, 1.0 mm thickness). NMR spectra were measured on Varian INOVA600 spectrometer and Bruker Mercury Plus 400 MHz NMR spectrometers. NMR spectras were recorded at 501 MHz and 400 MHz in  $\text{CDCl}_3$  or  $\text{DMSO-d}_6$ .  $^1\text{H}$  NMR spectras were referenced internally to tetramethylsilane as a standard, and  $^{13}\text{C}$  NMR spectras were recorded at 101 MHz and referenced to the solvent resonance.  $^1\text{H}$  NMR coupling constants were reported in Hz, and multiplicity was indicated as follows: s (singlet); d (doublet); t (triplet); q (quartet); m (multiplet); dd (doublet of doublets); dt (doublet of triplets); td (triplet of doublets); ddd (doublet of doublet of doublets). High resolution mass spectra (HRMS) were recorded on the Thermo Scientific Exactive Plus equipped with ESI ionization source. The diffraction data of crystals were collected on a Rigaku XtaLAB Synergy CCD diffractometer with graphite monochromated Cu-K $\alpha$  radiation ( $\lambda = 1.54056 \text{ \AA}$ ) at 293K.

## 2. Experimental Procedures

### 2.1 General procedure for preparation of substrates 1 and 3

#### a) General procedure for preparation of substrate 1

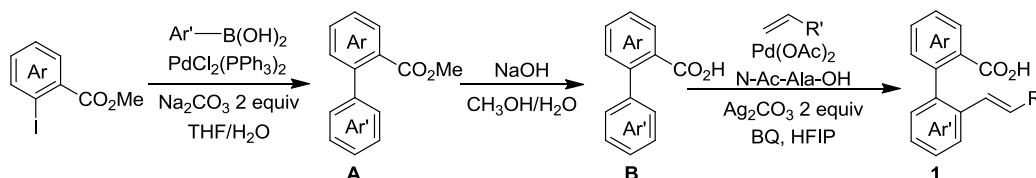

- 1) A schlenk tube was charged with methyl 2-iodobenzoate (10 mmol), arylboronic acid (12 mmol),  $\text{Na}_2\text{CO}_3$  (2.1 g, 20 mmol) dissolved in THF (30 mL) and water (15 mL) mixed solvents. The reaction mixture was degassed three times and charged with argon, after which  $\text{PdCl}_2(\text{PPh}_3)_2$  (8 mol%, 0.56 g, 0.8 mmol) was added. The reaction mixture was stirred at  $60^\circ\text{C}$  for 12 h and cooled to room temperature. Water (20 mL) was added to the mixture and extracted with  $\text{CH}_2\text{Cl}_2$  ( $3 \times 30$  mL). The combined organic phases were dried with  $\text{Na}_2\text{SO}_4$  and the solvent was evaporated via vacuo. Then, the crude product was purified by column chromatography (eluent: PE/EA = 40/1) to give a colorless liquid **A**.
- 2) The product **A** was dissolved in a solution of NaOH (5.0 equiv) in 30 mL  $\text{H}_2\text{O}$  and 30 mL MeOH and stirred at  $50^\circ\text{C}$  for 6 h. After reaction, the reaction mixture was evaporated in vacuo to remove methanol and diluted with  $\text{H}_2\text{O}$ . The aqueous phase was acidified with 3N HCl and then extracted three times with  $\text{Et}_2\text{O}$ . The combined organic phase was washed with  $\text{H}_2\text{O}$  and brine, dried over  $\text{Na}_2\text{SO}_4$ , filtered, and evaporated under reduced pressure to give the desired product **B** as a solid.
- 3) The carboxylic acid **B** (5 mmol, 1.0 equiv),  $\text{Pd}(\text{OAc})_2$  (112 mg, 0.5 mmol, 10 mol%), N-acetylalanine (130 mg, 1 mmol, 20 mol%),  $\text{Ag}_2\text{CO}_3$  (2.77 g, 10 mmol, 2.0 equiv), benzoquinone (540 mg, 1.0 equiv), alkene (25 mmol, 5.0 equiv) and 20 mL HFIP were added to the sealed tube. The tube was sealed with a Teflon lined cap and the reaction mixture was stirred at  $80^\circ\text{C}$  for 12 h. After cooling to room temperature, the mixture was filtered over celite, concentrated under vacuum and the residue was purified by column chromatography (eluent: HOAc/EA/PE = 1/5/100) to give the substrate **1**.

## b) General procedure for preparation of substrate 3

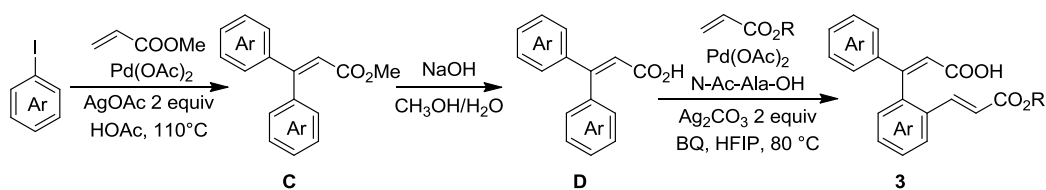

- 1) A sealed tube was charged with aryl iodide (18 mmol, 1.0 equiv), methyl acrylate (541 mg, 6.3 mmol, 0.35 equiv) and AgOAc (11.5 g, 34 mmol, 2.0 equiv) dissolved in HOAc (15 mL) and stirred at 110°C for overnight. After cooling to room temperature, the mixture was filtered through a pad of silica and washed with H<sub>2</sub>O and saturated sodium carbonate solution three times to remove HOAc. The combined organic phases were dried with Na<sub>2</sub>SO<sub>4</sub> and the solvent was evaporated via vacuo. Then, the crude product was purified by column chromatography (eluent: PE/EA = 40/1 to give a colorless liquid (**C**).
- 2) The product **C** was dissolved in a solution of NaOH (5.0 equiv) in 20 mL H<sub>2</sub>O and 20 mL MeOH and stirred at 50°C for 6 h. After reaction, the reaction mixture was evaporated in vacuo to remove methanol and diluted with H<sub>2</sub>O. The aqueous phase was acidified with 3N HCl and then extracted three times with Et<sub>2</sub>O. The combined organic phase was washed with H<sub>2</sub>O and brine, dried over Na<sub>2</sub>SO<sub>4</sub>, filtered, and evaporated under reduced pressure to give the desired product **D** as a solid.
- 3) The carboxylic acid **D** (2.5 mmol, 1.0 equiv), Pd(OAc)<sub>2</sub> (56 mg, 0.25 mmol, 10 mol%), N-acetylalanine (65 mg, 0.5 mmol, 20 mol%), Ag<sub>2</sub>CO<sub>3</sub> (1.38 g, 5 mmol, 2.0 equiv), benzoquinone (270 mg, 1.0 equiv), alkene (12.5 mmol, 5.0 equiv) and 10 mL HFIP were added to the sealed tube. The tube was sealed with a Teflon lined cap and the reaction mixture was stirred at 80°C for 12 h. After cooling to room temperature, the mixture was filtered over celite, concentrated under vacuum and the residue was purified by column chromatography (eluent: HOAc/EA/PE = 1/5/100) to give the substrate **3**.

## 2.2 Optimization of Conditions

Reaction scheme: 1a  $\xrightarrow[\text{base, MeCN, T(°C)}]{\text{I}^+ \text{ reagent}}$  2a (exo/endo)

| Entry           | Base                            | I <sup>+</sup> reagent | T/°C | Yield of 2a | dr of 2a | exo/endo |
|-----------------|---------------------------------|------------------------|------|-------------|----------|----------|
| 1               | K <sub>2</sub> CO <sub>3</sub>  | I <sub>2</sub>         | 100  | 40%         | 1.3:1    | 20:1     |
| 2               | Cs <sub>2</sub> CO <sub>3</sub> | I <sub>2</sub>         | 100  | 57%         | 1.7:1    | > 20:1   |
| 3               | Li <sub>2</sub> CO <sub>3</sub> | I <sub>2</sub>         | 100  | 65%         | 2:1      | > 20:1   |
| 4               | KHCO <sub>3</sub>               | I <sub>2</sub>         | 100  | 13%         | 3:1      | 13:1     |
| 5               | KHSO <sub>4</sub>               | I <sub>2</sub>         | 100  | 51%         | 4:1      | 17:1     |
| 6               | K <sub>2</sub> HPO <sub>4</sub> | I <sub>2</sub>         | 100  | 56%         | 2:1      | 18:1     |
| 7               | KOH                             | I <sub>2</sub>         | 100  | 42%         | 1:1      | > 20:1   |
| 8               | NaO <sup>t</sup> Bu             | I <sub>2</sub>         | 100  | 58%         | 4:1      | 19:1     |
| 9               | none                            | I <sub>2</sub>         | 100  | 11%         | 1:1      | 6:1      |
| 10              | NaO <sup>t</sup> Bu             | I <sub>2</sub>         | 80   | 63%         | 10:1     | 13:1     |
| 11              | NaO <sup>t</sup> Bu             | I <sub>2</sub>         | 60   | 65%         | 15:1     | 14:1     |
| 12              | NaO <sup>t</sup> Bu             | I <sub>2</sub>         | rt   | 70%         | 18:1     | 14:1     |
| 13 <sup>b</sup> | NaO <sup>t</sup> Bu             | NIS                    | rt   | 90%         | > 20:1   | > 20:1   |
| 14 <sup>c</sup> | NaO <sup>t</sup> Bu             | NIS                    | rt   | 88%         | > 20:1   | > 20:1   |
| 15              | KHCO <sub>3</sub>               | NIS                    | rt   | 76%         | > 20:1   | > 20:1   |
| 16 <sup>d</sup> | NaO <sup>t</sup> Bu             | NIS                    | rt   | 81%         | > 20:1   | > 20:1   |
| 17              | NaO <sup>t</sup> Bu             | ---                    | rt   | 0%          | ---      | ---      |

<sup>a</sup>Reaction conditions: 1a (0.1 mmol), base (1.0 eq.) iodine reagent (3.0 eq.), in 0.5 mL of MeCN at room temperature under air, 12 h. Yield, dr and exo/endo were determined by <sup>1</sup>H NMR analysis. <sup>b</sup>Isolated yield. <sup>c</sup>In Ar condition. <sup>d</sup>1.5 eq. of NIS. Dr = diastereoselectivity.

## 2.3 General Procedures for Products

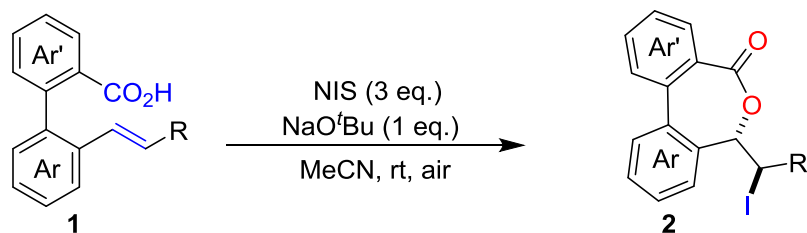

A mixture of **1** (0.15 mmol), NIS (0.45 mmol), NaO<sup>t</sup>Bu (0.15 mmol), MeCN (0.5 mL) in a 35 mL sealed tube was stirred at rt for 12 h under an atmosphere of air. After reaction, the mixture was filtered through a pad of silica and concentrated under a reduced pressure. Then, the crude product was purified by prepared column chromatography to give the corresponding product.

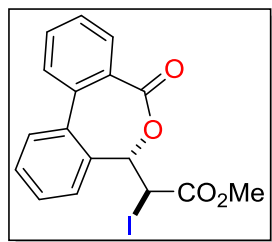

### methyl 2-iodo-2-(7-oxo-5,7-dihydrodibenzo[c,e]oxepin-5-yl)acetate (**2a**)

The general procedure was applied to **1a** (0.15 mmol), NIS (0.45 mmol), NaO<sup>t</sup>Bu (0.15 mmol), MeCN (0.5 mL) in a 35 mL sealed tube was stirred at rt for 12 h under an atmosphere of air. The crude product was purified by prepared column chromatography ( $R_f$  = 0.6, PE/EtOAc = 5/1) to afford the title compound as white solid (55 mg, 90% yield). **<sup>1</sup>H NMR (400 MHz, CDCl<sub>3</sub>)**  $\delta$  7.99 (d,  $J$  = 7.6 Hz, 1H), 7.75-7.71 (m, 1H), 7.66 (d,  $J$  = 7.6 Hz, 1H), 7.63 (d,  $J$  = 7.6 Hz, 1H), 7.59-7.50 (m, 4H), 5.64 (d,  $J$  = 11.2 Hz, 1H), 5.01 (d,  $J$  = 11.2 Hz, 1H), 3.86 (s, 3H). **<sup>13</sup>C NMR (101 MHz, CDCl<sub>3</sub>)**  $\delta$  170.0, 167.9, 139.1, 137.0, 133.0, 131.5, 129.8, 129.7, 128.9, 128.8, 128.3, 125.2, 53.5, 14.6. **<sup>1</sup>H NMR (501 MHz, DMSO-*d*<sub>6</sub>)**  $\delta$  7.90 (d,  $J$  = 7.5 Hz, 1H), 7.86-7.82 (m, 2H), 7.79 (d,  $J$  = 7.5 Hz, 1H), 7.75 (d,  $J$  = 6.0 Hz, 1H), 7.68 (t,  $J$  = 7.0 Hz, 1H), 7.62 (t,  $J$  = 7.5 Hz, 1H), 7.58-7.55 (m, 1H), 5.47 (d,  $J$  = 11.5 Hz, 1H), 5.40 (d,  $J$  = 11.5 Hz, 1H), 3.77 (s, 3H). **<sup>13</sup>C NMR (101 MHz, DMSO-*d*<sub>6</sub>)**  $\delta$  171.0, 167.4, 138.2, 136.4, 133.6, 133.0,

130.9, 130.3, 129.5, 129.4, 129.3, 129.2, 128.6, 126.3, 77.5, 53.2, 14.8. HRMS (ESI) exact mass calculated for  $[M+Na]^+$  ( $C_{17}H_{13}O_4INa$ ): 430.9751, found: 430.9741.

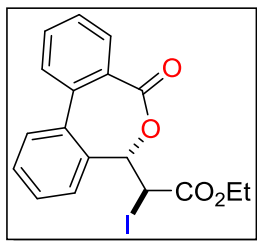

**ethyl 2-iodo-2-(7-oxo-5,7-dihydrodibenzo[c,e]oxepin-5-yl)acetate (2b)**

The general procedure was applied to **1b** (0.15 mmol), NIS (0.45 mmol), NaO<sup>t</sup>Bu (0.15 mmol), MeCN (0.5 mL) in a 35 mL sealed tube was stirred at rt for 12 h under an atmosphere of air. The crude product was purified by prepared column chromatography ( $R_f$  = 0.6, PE/EtOAc = 5/1) to afford the title compound as white solid (51.3 mg, 81% yield). <sup>1</sup>H NMR (400 MHz, CDCl<sub>3</sub>)  $\delta$  7.98 (d,  $J$  = 8.0 Hz, 1H), 7.72 (t,  $J$  = 7.6 Hz, 1H), 7.67-7.62 (m, 2H), 7.58-7.49 (m, 4H), 5.64 (d,  $J$  = 11.2 Hz, 1H), 4.99 (d,  $J$  = 11.2 Hz, 1H), 4.41-4.22 (m, 2H), 1.32 (t,  $J$  = 7.2 Hz, 3H). <sup>13</sup>C NMR (101 MHz, CDCl<sub>3</sub>)  $\delta$  169.4, 168.1, 139.2, 137.2, 133.2, 133.1, 131.6, 130.1, 130.0, 129.8, 129.0, 128.5, 125.3, 62.6, 15.3, 13.9. HRMS (ESI) exact mass calculated for  $[M+Na]^+$  ( $C_{18}H_{15}O_4INa$ ): 444.9907, found: 444.9883.

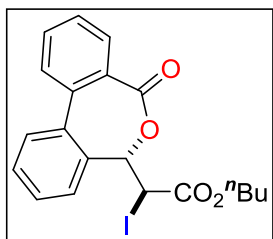

**butyl 2-iodo-2-(7-oxo-5,7-dihydrodibenzo[c,e]oxepin-5-yl)acetate (2c)**

The general procedure was applied to **1c** (0.15 mmol), NIS (0.45 mmol), NaO<sup>t</sup>Bu (0.15 mmol), MeCN (0.5 mL) in a 35 mL sealed tube was stirred at rt for 12 h under an atmosphere of air. The crude product was purified by prepared column chromatography ( $R_f$  = 0.6, PE/EtOAc = 5/1) to afford the title compound as white solid (52.6 mg, 78% yield). <sup>1</sup>H NMR (501 MHz, CDCl<sub>3</sub>)  $\delta$  7.97 (d,  $J$  = 8.0 Hz, 1H), 7.73-7.70 (m, 1H), 7.66-7.61 (m, 2H), 7.57-7.50 (m, 4H), 5.63 (d,  $J$  = 11.0 Hz, 1H), 4.99 (d,  $J$  = 11.5 Hz,

1H), 4.34-4.17 (m, 2H), 1.69-1.66 (m, 2H), 1.45-1.40 (m, 2H), 0.96 (t,  $J = 7.5$  Hz, 3H).  $^{13}\text{C}$  NMR (101 MHz,  $\text{CDCl}_3$ )  $\delta$  169.5, 168.1, 139.2, 137.2, 133.2, 133.1, 131.6, 130.1, 129.8, 129.0, 128.5, 125.3, 66.5, 30.4, 19.2, 15.4, 13.8. HRMS (ESI) exact mass calculated for  $[\text{M}+\text{Na}]^+$  ( $\text{C}_{20}\text{H}_{19}\text{O}_4\text{I}$ ): 473.0220, found: 473.0193.

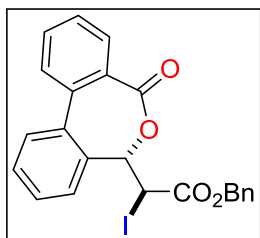

#### benzyl 2-iodo-2-(7-oxo-5,7-dihydrodibenzo[c,e]oxepin-5-yl)acetate (2d)

The general procedure was applied to **1d** (0.15 mmol), NIS (0.45 mmol), NaO<sup>t</sup>Bu (0.15 mmol), MeCN (0.5 mL) in a 35 mL sealed tube was stirred at rt for 12 h under an atmosphere of air. The crude product was purified by prepared column chromatography ( $R_f = 0.6$ , PE/EtOAc = 5/1) to afford the title compound as white solid (52.9 mg, 73% yield).  $^1\text{H}$  NMR (400 MHz,  $\text{CDCl}_3$ )  $\delta$  7.89 (d,  $J = 7.6$  Hz, 1H), 7.73-7.69 (m, 1H), 7.63 (t,  $J = 8.8$  Hz, 2H), 7.57-7.48 (m, 4H), 7.41-7.40 (m, 5H), 5.63 (d,  $J = 11.6$  Hz, 1H), 5.38 (d,  $J = 12.0$  Hz, 1H), 5.17 (d,  $J = 12.0$  Hz, 1H), 5.05 (d,  $J = 11.6$  Hz, 1H).  $^{13}\text{C}$  NMR (101 MHz,  $\text{CDCl}_3$ )  $\delta$  169.3, 168.0, 139.2, 137.2, 134.8, 133.1, 131.6, 130.2, 130.0, 129.8, 129.0, 128.8, 128.7, 128.6, 128.5, 125.3, 68.3, 15.2. HRMS (ESI) exact mass calculated for  $[\text{M}+\text{Na}]^+$  ( $\text{C}_{23}\text{H}_{17}\text{O}_4\text{INa}$ ): 507.0064, found: 507.0041.

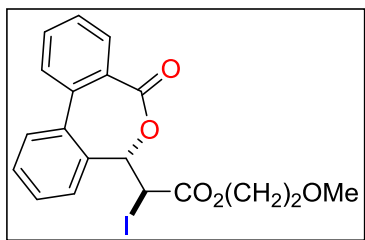

#### 2-methoxyethyl 2-iodo-2-(7-oxo-5,7-dihydrodibenzo[c,e]oxepin-5-yl)acetate (2e)

The general procedure was applied to **1e** (0.15 mmol), NIS (0.45 mmol), NaO<sup>t</sup>Bu (0.15 mmol), MeCN (0.5 mL) in a 35 mL sealed tube was stirred at rt for 12 h under an atmosphere of air. The crude product was purified by prepared column chromatography ( $R_f = 0.3$ , PE/EtOAc = 5/1) to afford the title compound as white solid (57.6 mg, 85%



yield). **<sup>1</sup>H NMR (400 MHz, CDCl<sub>3</sub>)** δ 7.98 (d, *J* = 7.2 Hz, 1H), 7.74-7.70 (m, 1H), 7.64 (m, 2H), 7.58-7.49 (m, 4H), 5.65 (d, *J* = 11.2 Hz, 1H), 5.05 (d, *J* = 11.2 Hz, 1H), 4.49-4.33 (m, 2H), 3.66-3.63 (m, 2H), 3.42 (s, 3H). **<sup>13</sup>C NMR (101 MHz, CDCl<sub>3</sub>)** δ 169.5, 168.0, 139.2, 137.2, 133.1, 131.6, 130.2, 130.0, 129.8, 129.0, 128.5, 125.3, 70.1, 65.4, 59.2, 15.0. HRMS (ESI) exact mass calculated for [M+Na]<sup>+</sup> (C<sub>19</sub>H<sub>17</sub>O<sub>5</sub>INa): 475.0013, found: 474.9984.

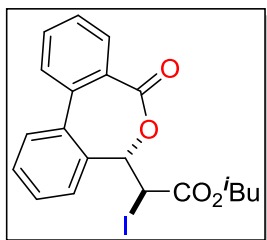

**isobutyl 2-iodo-2-(7-oxo-5,7-dihydrodibenzo[c,e]oxepin-5-yl)acetate (2f)**

The general procedure was applied to **1f** (0.15 mmol), NIS (0.45 mmol), NaO<sup>t</sup>Bu (0.15 mmol), MeCN (0.5 mL) in a 35 mL sealed tube was stirred at rt for 12 h under an atmosphere of air. The crude product was purified by prepared column chromatography (*R<sub>f</sub>* = 0.6, PE/EtOAc = 5/1) to afford the title compound as white solid (54.6 mg, 81% yield). **<sup>1</sup>H NMR (501 MHz, CDCl<sub>3</sub>)** δ 7.96 (d, *J* = 7.5 Hz, 1H), 7.72 (t, *J* = 7.5 Hz, 1H), 7.67-7.61 (m, 2H), 7.57-7.49 (m, 4H), 5.63 (d, *J* = 11.5 Hz, 1H), 5.01 (d, *J* = 11.5 Hz, 1H), 4.04 (ddd, *J* = 63.0 Hz, 10.0 Hz, 6.5 Hz, 2H), 2.05-1.97 (m, 1H), 0.98 (s, 3H), 0.97 (s, 3H). **<sup>13</sup>C NMR (101 MHz, CDCl<sub>3</sub>)** δ 169.5, 168.1, 139.2, 137.2, 133.2, 133.1, 131.6, 130.1, 129.8, 129.0, 128.5, 125.4, 77.1, 72.6, 27.8, 19.2, 15.3. HRMS (ESI) exact mass calculated for [M+Na]<sup>+</sup> (C<sub>20</sub>H<sub>19</sub>O<sub>4</sub>INa): 473.0220, found: 473.0193.

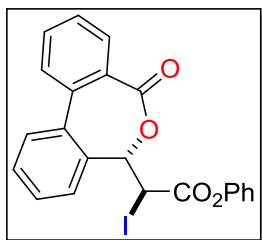

**phenyl 2-iodo-2-(7-oxo-5,7-dihydrodibenzo[c,e]oxepin-5-yl)acetate (2g)**

The general procedure was applied to **1g** (0.15 mmol), NIS (0.45 mmol), NaO<sup>t</sup>Bu (0.15 mmol), MeCN (0.5 mL) in a 35 mL sealed tube was stirred at rt for 12 h under an

atmosphere of air. The crude product was purified by prepared column chromatography ( $R_f = 0.6$ , PE/EtOAc = 5/1) to afford the title compound as White solid (56.4 mg, 80% yield).  **$^1\text{H}$  NMR (400 MHz,  $\text{CDCl}_3$ )**  $\delta$  7.97 (d,  $J = 8$  Hz, 1H), 7.71 (t,  $J = 8$  Hz, 1H), 7.67-7.63 (m, 2H), 7.59-7.52 (m, 4H), 7.44-7.40 (m, 2H), 7.27 (t,  $J = 7.2$  Hz, 1H), 7.20-7.17 (m, 2H), 5.74 (d,  $J = 11.2$  Hz, 1H), 5.23 (d,  $J = 11.2$  Hz, 1H).  **$^{13}\text{C}$  NMR (101 MHz,  $\text{CDCl}_3$ )**  $\delta$  168.1, 167.9, 150.4, 139.2, 137.1, 133.1, 132.9, 131.6, 130.2, 129.8, 129.6, 129.0, 128.5, 126.5, 125.1, 121.1, 14.9. HRMS (ESI) exact mass calculated for  $[\text{M}+\text{Na}]^+$  ( $\text{C}_{22}\text{H}_{15}\text{O}_4\text{INa}$ ): 492.9907, found: 492.9877.

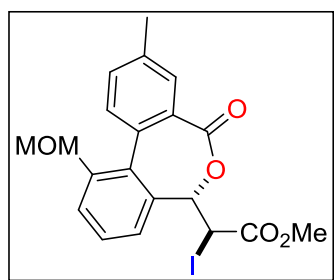

**methyl 2-(1,9-dimethyl-7-oxo-5,7-dihydrodibenzo[c,e]loxepin-5-yl)-2-iodoacetate (2h)**

The general procedure was applied to **1i** (0.15 mmol), NIS (0.45 mmol),  $\text{NaO}^t\text{Bu}$  (0.15 mmol), MeCN (0.5 mL) in a 35 mL sealed tube was stirred at rt for 12 h under an atmosphere of air. The crude product was purified by prepared column chromatography ( $R_f = 0.5$ , PE/EtOAc = 3/1) to afford the title compound as white solid (27.8 mg, 41% yield).  **$^1\text{H}$  NMR (501 MHz,  $\text{CDCl}_3$ )**  $\delta$  7.73 (s, 1H), 7.66 (d,  $J = 7.5$  Hz, 1H), 7.58 (d,  $J = 7.5$  Hz, 1H), 7.49-7.42 (m, 3H), 5.56 (d,  $J = 11.5$  Hz, 1H), 4.95 (d,  $J = 11.0$  Hz, 1H), 4.31 (dd,  $J = 69.5$  Hz, 11.0 Hz, 2H), 3.83 (s, 3H), 3.38 (s, 3H), 2.49 (s, 3H).  **$^{13}\text{C}$  NMR (101 MHz,  $\text{CDCl}_3$ )**  $\delta$  170.3, 168.6, 139.5, 138.3, 137.1, 134.2, 132.6, 132.2, 131.6, 131.0, 130.8, 130.6, 128.1, 124.8, 77.7, 72.9, 58.4, 53.6, 21.2, 14.9. HRMS (ESI) exact mass calculated for  $[\text{M}+\text{Na}]^+$  ( $\text{C}_{20}\text{H}_{19}\text{O}_5\text{INa}$ ): 489.0196, found: 489.0142.

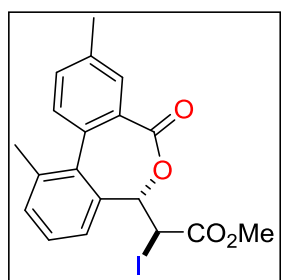

**methyl 2-(1,9-dimethyl-7-oxo-5,7-dihydrodibenzo[c,e]oxepin-5-yl)-2-iodoacetate (2i)**

The general procedure was applied to **1h** (0.15 mmol), NIS (0.45 mmol), NaO<sup>t</sup>Bu (0.15 mmol), MeCN (0.5 mL) in a 35 mL sealed tube was stirred at rt for 12 h under an atmosphere of air. The crude product was purified by prepared column chromatography ( $R_f$  = 0.6, PE/EtOAc = 5/1) to afford the title compound as white solid (49 mg, 75% yield). <sup>1</sup>H NMR (501 MHz, CDCl<sub>3</sub>)  $\delta$  7.72 (s, 1H), 7.46-7.42 (m, 2H), 7.39-7.30 (m, 3H), 5.53 (d,  $J$  = 11.5 Hz, 1H), 4.94 (d,  $J$  = 11.5 Hz, 1H), 3.83 (s, 3H), 2.48 (s, 3H), 2.37 (s, 3H). <sup>13</sup>C NMR (101 MHz, CDCl<sub>3</sub>)  $\delta$  170.3, 168.7, 139.0, 137.7, 137.3, 134.2, 132.9, 132.5, 132.3, 130.8, 130.6, 127.8, 122.8, 77.9, 53.6, 21.7, 21.2, 15.1. HRMS (ESI) exact mass calculated for [M+Na]<sup>+</sup> (C<sub>19</sub>H<sub>17</sub>O<sub>4</sub>INa): 459.0064, found: 459.0039.

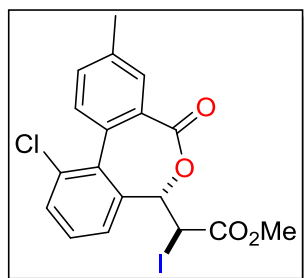

**methyl 2-(1-chloro-7-oxo-5,7-dihydrodibenzo[c,e]oxepin-5-yl)-2-iodoacetate (2j)**

The general procedure was applied to **1j** (0.15 mmol), NIS (0.45 mmol), NaO<sup>t</sup>Bu (0.15 mmol), MeCN (0.5 mL) in a 35 mL sealed tube was stirred at rt for 12 h under an atmosphere of air. The crude product was purified by prepared column chromatography ( $R_f$  = 0.6, PE/EtOAc = 5/1) to afford the title compound as white solid (47 mg, 71% yield). <sup>1</sup>H NMR (501 MHz, CDCl<sub>3</sub>)  $\delta$  7.77 (d,  $J$  = 8.0 Hz, 1H), 7.73 (s, 1H), 7.59-7.57 (m, 1H), 7.49 (d,  $J$  = 8.0 Hz, 1H), 7.38 (d,  $J$  = 5.0 Hz, 2H), 5.52 (d,  $J$  = 11.5 Hz, 1H), 4.91 (d,  $J$  = 11.5 Hz, 1H), 3.83 (s, 3H), 2.49 (s, 3H). <sup>13</sup>C NMR (101 MHz, CDCl<sub>3</sub>)  $\delta$  170.0, 168.0, 140.0, 136.5, 136.2, 134.0, 132.3, 132.2, 131.3, 130.8, 130.6, 130.1, 129.0, 123.9, 77.6, 53.7, 21.3, 14.7. HRMS (ESI) exact mass calculated for [M+Na]<sup>+</sup> (C<sub>18</sub>H<sub>14</sub>O<sub>4</sub>ClINa): 478.9518/ 480.9488, found: 478.9493/ 480.9460.

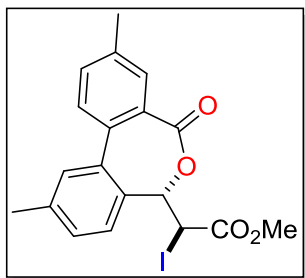

**methyl 2-(2,9-dimethyl-7-oxo-5,7-dihydrodibenzo[c,e]oxepin-5-yl)-2-iodoacetate (2k)**

The general procedure was applied to **1k** (0.15 mmol), NIS (0.45 mmol), NaO<sup>t</sup>Bu (0.15 mmol), MeCN (0.5 mL) in a 35 mL sealed tube was stirred at rt for 12 h under an atmosphere of air. The crude product was purified by prepared column chromatography ( $R_f$  = 0.6, PE/EtOAc = 5/1) to afford the title compound as white solid (49.7 mg, 76% yield). <sup>1</sup>H NMR (501 MHz, CDCl<sub>3</sub>) δ 7.78 (s, 1H), 7.55-7.50 (m, 2H), 7.40 (s, 1H), 7.36 (d,  $J$  = 7.5 Hz, 1H), 7.27 (d,  $J$  = 8.5 Hz, 1H), 5.59 (d,  $J$  = 11.0 Hz, 1H), 4.98 (d,  $J$  = 11.5 Hz, 1H), 3.84 (s, 3H), 2.47 (s, 3H), 2.44 (s, 3H). <sup>13</sup>C NMR (101 MHz, CDCl<sub>3</sub>) δ 170.3, 168.5, 140.1, 139.1, 134.5, 134.0, 131.9, 130.2, 129.8, 128.9, 125.2, 77.1, 53.6, 21.5, 21.1, 14.9. HRMS (ESI) exact mass calculated for [M+Na]<sup>+</sup> (C<sub>19</sub>H<sub>17</sub>O<sub>4</sub>INa): 459.0064, found: 459.0036.

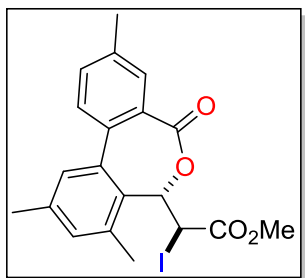

**Methyl 2-iodo-2-(2,4,9-trimethyl-7-oxo-5,7-dihydrodibenzo[c,e]oxepin-5-yl)acetate (2l)**

The general procedure was applied to **1l** (0.15 mmol), NIS (0.45 mmol), NaO<sup>t</sup>Bu (0.15 mmol), MeCN (0.5 mL) in a 35 mL sealed tube was stirred at rt for 12 h under an atmosphere of air. The crude product was purified by prepared column chromatography ( $R_f$  = 0.6, PE/EtOAc = 5/1) to afford the title compound as white solid (62.7 mg, 93% yield). <sup>1</sup>H NMR (501 MHz, CDCl<sub>3</sub>) δ 7.68 (s, 1H), 7.51 (dd,  $J$  = 19.0 Hz, 8.0 Hz, 2H), 7.17 (s, 1H), 7.11 (s, 1H), 6.18 (d,  $J$  = 12.0 Hz, 1H), 4.49 (d,  $J$  = 12.0 Hz, 1H), 3.78 (s,

3H), 2.58 (s, 3H), 2.46 (s, 3H), 2.40 (s, 3H).  $^{13}\text{C}$  NMR (101 MHz,  $\text{CDCl}_3$ )  $\delta$  169.6, 168.2, 140.2, 139.1, 137.6, 137.5, 134.6, 134.3, 131.9, 131.7, 131.0, 130.0, 129.1, 129.0, 76.9, 53.6, 21.3, 21.1, 20.8, 17.5. HRMS (ESI) exact mass calculated for  $[\text{M}+\text{Na}]^+$  ( $\text{C}_{20}\text{H}_{19}\text{O}_4\text{INa}$ ): 473.0220, found: 473.0192.

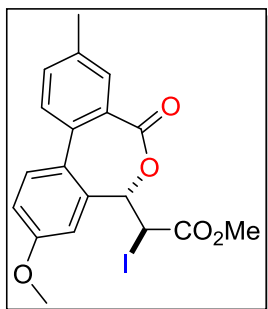

**Methyl 2-iodo-2-(3-methoxy-9-methyl-7-oxo-5,7-dihydrodibenzo[c,e]oxepin-5-yl)acetate(2m)**

The general procedure was applied to **1m** (0.15 mmol), NIS (0.45 mmol),  $\text{NaO}^t\text{Bu}$  (0.15 mmol), MeCN (0.5 mL) in a 35 mL sealed tube was stirred at rt for 12 h under an atmosphere of air. The crude product was purified by prepared column chromatography ( $R_f$  = 0.3, PE/EtOAc = 5/1) to afford the title compound as white solid (56.2 mg, 83% yield).  $^1\text{H}$  NMR (501 MHz,  $\text{CDCl}_3$ )  $\delta$  7.77 (s, 1H), 7.53-7.49 (m, 3H), 7.05 (d,  $J$  = 8.5 Hz, 1H), 7.00 (s, 1H), 5.60 (d,  $J$  = 11.0 Hz, 1H), 4.95 (d,  $J$  = 11.5 Hz, 1H), 3.90 (s, 3H), 3.85 (s, 3H), 2.46 (s, 3H).  $^{13}\text{C}$  NMR (101 MHz,  $\text{CDCl}_3$ )  $\delta$  170.2, 168.4, 159.5, 138.5, 134.4, 134.2, 134.1, 132.0, 131.6, 130.9, 129.3, 128.7, 115.2, 111.5, 77.1, 55.7, 53.7, 21.1, 14.7. HRMS (ESI) exact mass calculated for  $[\text{M}+\text{Na}]^+$  ( $\text{C}_{19}\text{H}_{17}\text{O}_5\text{INa}$ ): 475.0013, found: 474.9988.

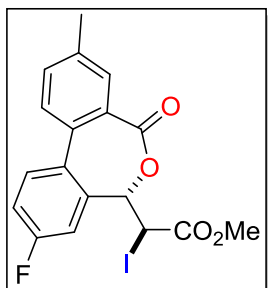

**Methyl 2-(3-fluoro-9-methyl-7-oxo-5,7-dihydrodibenzo[c,e]oxepin-5-yl)-2-iodoacetate (2n)**

The general procedure was applied to **1n** (0.15 mmol), NIS (0.45 mmol), NaO<sup>t</sup>Bu (0.15 mmol), MeCN (0.5 mL) in a 35 mL sealed tube was stirred at rt for 12 h under an atmosphere of air. The crude product was purified by prepared column chromatography ( $R_f$  = 0.6, PE/EtOAc = 5/1) to afford the title compound as white solid (54.1 mg, 82% yield). **<sup>1</sup>H NMR (501 MHz, CDCl<sub>3</sub>)**  $\delta$  7.79 (s, 1H), 7.58 (dd,  $J$  = 8.5 Hz, 5.5 Hz, 1H), 7.53-7.49 (m, 2H), 7.25-7.19 (m, 2H), 5.59 (d,  $J$  = 11.0 Hz, 1H), 4.91 (d,  $J$  = 11.0 Hz, 1H), 3.85 (s, 3H), 2.47 (s, 3H). **<sup>13</sup>C NMR (101 MHz, CDCl<sub>3</sub>)**  $\delta$  170.0, 168.0, 162.3 (d,  $J$  = 250.3 Hz), 139.4, 135.3 (d,  $J$  = 3.3 Hz), 135.1 (d,  $J$  = 7.4 Hz), 134.2, 133.54, 132.1, 131.5 (d,  $J$  = 8.4 Hz), 129.5, 128.9, 117.2 (d,  $J$  = 21.3 Hz), 112.9 (d,  $J$  = 23.7 Hz), 76.7, 53.7, 21.1, 14.3. HRMS (ESI) exact mass calculated for  $[M+Na]^+$  (C<sub>18</sub>H<sub>14</sub>FO<sub>4</sub>INa): 462.9813, found: 462.9785.

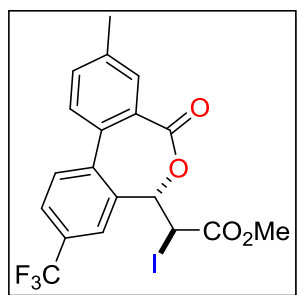

**Methyl 2-iodo-2-(9-methyl-7-oxo-3-(trifluoromethyl)-5,7-dihydrodibenzo[c,e]joxepin-5-yl)acetate (2o)**

The general procedure was applied to **1o** (0.15 mmol), NIS (0.45 mmol), NaO<sup>t</sup>Bu (0.15 mmol), MeCN (0.5 mL) in a 35 mL sealed tube was stirred at rt for 12 h under an atmosphere of air. The crude product was purified by prepared column chromatography ( $R_f$  = 0.5, PE/EtOAc = 5/1) to afford the title compound as white solid (47 mg, 64% yield). **<sup>1</sup>H NMR (501 MHz, CDCl<sub>3</sub>)**  $\delta$  7.84 (s, 1H), 7.80-7.73 (m, 3H), 7.57 (s, 2H), 5.64 (d,  $J$  = 11.0 Hz, 1H), 5.00 (d,  $J$  = 11.5 Hz, 1H), 3.87 (s, 3H), 2.50 (s, 3H). **<sup>13</sup>C NMR (101 MHz, CDCl<sub>3</sub>)**  $\delta$  170.0, 167.6, 142.7, 140.5, 134.3, 133.9, 133.0, 132.3, 130.3 (q,  $J$  = 33.1 Hz), 130.1, 129.8, 129.1, 126.9 (q,  $J$  = 3.1 Hz), 123.3 (q,  $J$  = 273.5 Hz), 122.8 (q,  $J$  = 3.7 Hz), 76.6, 53.8, 21.2, 14.2. HRMS (ESI) exact mass calculated for  $[M+Na]^+$  (C<sub>19</sub>H<sub>14</sub>F<sub>3</sub>O<sub>4</sub>INa): 512.9781, found: 512.9751.

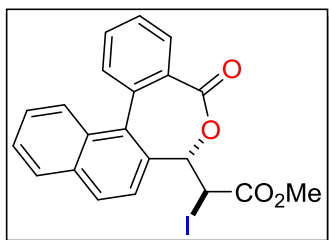

**methyl 2-iodo-2-(5-oxo-5,7-dihydrobenzo[c]naphtho[1,2-e]oxepin-7-yl)acetate (2p)**

The general procedure was applied to **1p** (0.15 mmol), NIS (0.45 mmol), NaO<sup>t</sup>Bu (0.15 mmol), MeCN (0.5 mL) in a 35 mL sealed tube was stirred at rt for 12 h under an atmosphere of air. The crude product was purified by prepared column chromatography ( $R_f$  = 0.6, PE/EtOAc = 5/1) to afford the title compound as white solid (42.6 mg, 62% yield). <sup>1</sup>H NMR (501 MHz, CDCl<sub>3</sub>) δ 8.03-7.92 (m, 4H), 7.80-7.73 (m, 2H), 7.65-7.54 (m, 3H), 7.50 (t,  $J$  = 7.5 Hz, 1H), 5.71 (d,  $J$  = 11.5 Hz, 1H), 5.06 (d,  $J$  = 11.5 Hz, 1H), 3.85 (s, 3H). <sup>13</sup>C NMR (101 MHz, CDCl<sub>3</sub>) δ 170.3, 168.3, 136.1, 134.5, 134.5, 131.8, 131.7, 131.5, 131.3, 130.8, 129.2, 128.8, 127.4, 127.1, 126.3, 121.9, 78.0, 53.7, 15.4. HRMS (ESI) exact mass calculated for [M+Na]<sup>+</sup> (C<sub>21</sub>H<sub>15</sub>O<sub>4</sub>INa): 480.9907, found: 480.9878.

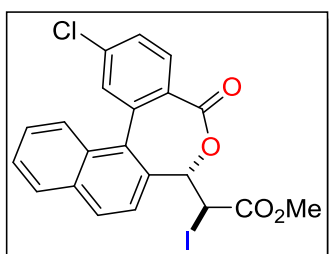

**Methyl 2-(2-chloro-5-oxo-5,7-dihydrobenzo[c]naphtho[1,2-e]oxepin-7-yl)-2-iodoacetate (2q)**

The general procedure was applied to **1q** (0.15 mmol), NIS (0.45 mmol), NaO<sup>t</sup>Bu (0.15 mmol), MeCN (0.5 mL) in a 35 mL sealed tube was stirred at rt for 12 h under an atmosphere of air. The crude product was purified by prepared column chromatography ( $R_f$  = 0.6, PE/EtOAc = 5/1) to afford the title compound as white solid (38.3 mg, 52% yield). <sup>1</sup>H NMR (501 MHz, CDCl<sub>3</sub>) δ 8.01-7.94 (m, 4H), 7.79 (s, 1H), 7.63-7.55 (m, 4H), 5.69 (d,  $J$  = 11.0 Hz, 1H), 5.05 (d,  $J$  = 11.5 Hz, 1H), 3.86 (s, 3H). <sup>13</sup>C NMR (101 MHz, CDCl<sub>3</sub>) δ 170.1, 167.4, 138.0, 136.2, 134.7, 134.5, 132.3, 131.9, 131.6, 131.0,

130.2, 129.8, 129.4, 128.9, 127.9, 127.3, 125.8, 121.9, 78.1, 53.7, 15.1. HRMS (ESI) exact mass calculated for  $[M+Na]^+$  ( $C_{21}H_{14}ClO_4INa$ ): 514.9518/ 516.9488, found: 514.9518/ 516.9494.

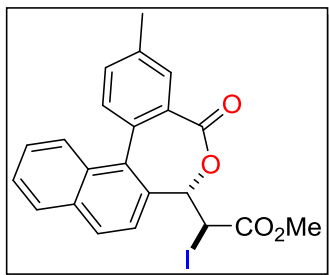

**Methyl 2-iodo-2-(3-methyl-5-oxo-5,7-dihydrobenzo[c]naphtho[1,2-e]oxepin-7-yl)acetate (2r)**

The general procedure was applied to **1r** (0.15 mmol), NIS (0.45 mmol), NaO<sup>t</sup>Bu (0.15 mmol), MeCN (0.5 mL) in a 35 mL sealed tube was stirred at rt for 12 h under an atmosphere of air. The crude product was purified by prepared column chromatography ( $R_f$  = 0.6, PE/EtOAc = 5/1) to afford the title compound as White solid (49.5 mg, 70% yield). <sup>1</sup>H NMR (400 MHz, CDCl<sub>3</sub>) δ 8.02 (d,  $J$  = 8.8 Hz, 1H), 7.94 (d,  $J$  = 8.8 Hz, 1H), 7.91 (d,  $J$  = 7.6 Hz, 1H), 7.82(s, 1H), 7.67 (d,  $J$  = 8.0 Hz, 1H), 7.58 (d,  $J$  = 8.8 Hz, 1H), 7.55-7.52 (m, 2H), 7.49-7.45 (m, 1H), 5.71 (d,  $J$  = 11.6 Hz, 1H), 5.05 (d,  $J$  = 11.2 Hz, 1H), 3.85 (s, 3H), 2.52 (s, 3H). <sup>13</sup>C NMR (101 MHz, CDCl<sub>3</sub>) δ 170.3, 168.5, 139.5, 136.2, 134.5, 132.4, 131.7, 131.6, 131.5, 131.4, 131.0, 128.9, 128.7, 127.3, 127.0, 126.4, 121.9, 78.0, 53.7, 21.3, 15.5. HRMS (ESI) exact mass calculated for  $[M+Na]^+$  ( $C_{22}H_{17}O_4INa$ ): 495.0064, found: 495.0030.

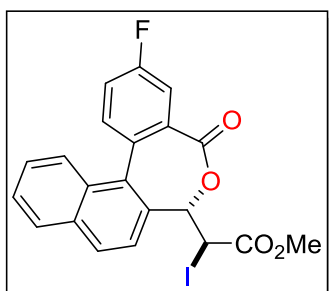

**methyl 2-(3-fluoro-5-oxo-5,7-dihydrobenzo[c]naphtho[1,2-e]oxepin-7-yl)-2-iodoacetate (2s)**

The general procedure was applied to **1s** (0.15 mmol), NIS (0.45 mmol), NaO<sup>t</sup>Bu (0.15 mmol), MeCN (0.5 mL) in a 35 mL sealed tube was stirred at rt for 12 h under an



atmosphere of air. The crude product was purified by prepared column chromatography ( $R_f = 0.6$ , PE/EtOAc = 5/1) to afford the title compound as white solid (44.2 mg, 62% yield).  **$^1\text{H}$  NMR (501 MHz,  $\text{CDCl}_3$ )**  $\delta$  7.99-7.93 (m, 3H), 7.80 (dd,  $J = 5.5$  Hz, 6.0 Hz, 1H), 7.73-7.71 (m, 1H), 7.60-7.45 (m, 4H), 5.70 (d,  $J = 11.5$  Hz, 1H), 5.06 (d,  $J = 11.5$  Hz, 1H), 3.86 (s, 3H).  **$^{13}\text{C}$  NMR (101 MHz,  $\text{CDCl}_3$ )**  $\delta$  170.1, 166.9, 162.4 (d,  $J = 252.8$  Hz, 1H), 135.2, 134.5, 133.9 (d,  $J = 7.7$  Hz), 133.7 (d,  $J = 7.5$  Hz), 131.4 (d,  $J = 20.6$  Hz), 130.7 (d,  $J = 3.7$  Hz), 129.4, 128.9, 127.6, 127.2, 126.0, 121.9, 119.1 (d,  $J = 21.6$  Hz), 117.5 (d,  $J = 25.8$  Hz), 78.3, 53.8, 15.1. HRMS (ESI) exact mass calculated for  $[\text{M}+\text{Na}]^+$  ( $\text{C}_{21}\text{H}_{14}\text{FO}_4\text{INa}$ ): 498.9813, found: 498.9780.

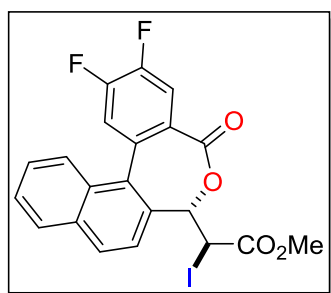

**methyl 2-(2,3-difluoro-5-oxo-5,7-dihydrobenzo[c]naphtho[1,2-e]oxepin-7-yl)-2-iodoacetate (2t)**

The general procedure was applied to **1t** (0.15 mmol), NIS (0.45 mmol), NaO<sup>t</sup>Bu (0.15 mmol), MeCN (0.5 mL) in a 35 mL sealed tube was stirred at rt for 12 h under an atmosphere of air. The crude product was purified by prepared column chromatography ( $R_f = 0.6$ , PE/EtOAc = 5/1) to afford the title compound as white solid (61.5 mg, 83% yield).  **$^1\text{H}$  NMR (501 MHz,  $\text{CDCl}_3$ )**  $\delta$  8.01-7.94 (m, 3H), 7.88-7.84 (m, 1H), 7.65-7.55 (m, 4H), 5.70 (d,  $J = 11.5$  Hz, 1H), 5.05 (d,  $J = 11.0$  Hz, 1H), 3.86 (s, 3H).  **$^{13}\text{C}$  NMR (101 MHz,  $\text{CDCl}_3$ )**  $\delta$  170.1, 166.1, 151.9 (dd,  $J = 259.0$  Hz, 12.8 Hz), 150.3 (dd,  $J = 255.6$  Hz, 13.0 Hz), 134.5, 134.1, 132.2 (dd,  $J = 7.1$  Hz, 4.3 Hz), 131.7, 131.0, 129.9, 129.0, 128.7 (dd,  $J = 5.5$  Hz, 3.5 Hz), 128.0, 127.4, 125.5, 121.9, 120.9 (d,  $J = 18.7$  Hz), 120.2 (d,  $J = 19.2$  Hz), 78.3, 53.8, 14.9. HRMS (ESI) exact mass calculated for  $[\text{M}+\text{Na}]^+$  ( $\text{C}_{21}\text{H}_{13}\text{F}_2\text{O}_4\text{INa}$ ): 516.9719, found: 516.9690.

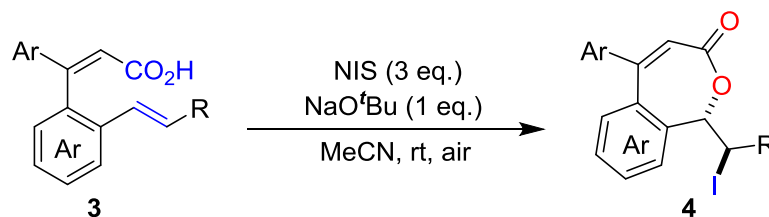

A mixture of **3** (0.15 mmol), NIS (0.45 mmol), NaO<sup>t</sup>Bu (0.15 mmol), MeCN (0.5 mL) in a 35 mL sealed tube was stirred at rt for 12 h under an atmosphere of air. After reaction, the reaction mixture was filtered through a pad of silica and concentrated under a reduced pressure. The crude product was purified by prepared column chromatography to give the corresponding product **4**.

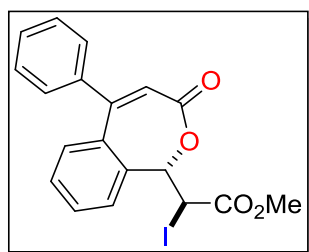

**methyl 2-iodo-2-(3-oxo-5-phenyl-1,3-dihydrobenzo[c]oxepin-1-yl)acetate (4a)**

The general procedure was applied to **3a** (0.15 mmol), NIS (0.45 mmol), NaO<sup>t</sup>Bu (0.15 mmol), MeCN (0.5 mL) in a 35 mL sealed tube was stirred at rt for 12 h under an atmosphere of air. The crude product was purified by prepared column chromatography ( $R_f = 0.6$ , PE/EtOAc = 5/1) to afford the title compound as white solid (50.7 mg, 78% yield). <sup>1</sup>H NMR (501 MHz, CDCl<sub>3</sub>)  $\delta$  7.55-7.50 (m, 2H), 7.49-7.39 (m, 6H), 7.16 (d,  $J = 7.5$  Hz, 1H), 6.58 (s, 1H), 5.89 (d,  $J = 11.5$  Hz, 1H), 5.02 (d,  $J = 11.0$  Hz, 1H), 3.87 (s, 3H). <sup>13</sup>C NMR (101 MHz, CDCl<sub>3</sub>)  $\delta$  170.0, 166.3, 151.5, 140.1, 137.8, 134.4, 131.2, 129.9, 129.4, 129.3, 128.8, 125.6, 120.0, 76.5, 53.7, 15.1. HRMS (ESI) exact mass calculated for [M+Na]<sup>+</sup> (C<sub>19</sub>H<sub>15</sub>O<sub>4</sub>INa): 456.9907, found: 456.9874.

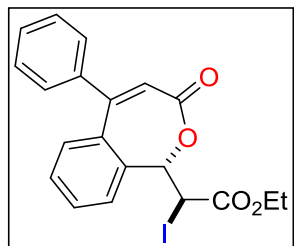

**ethyl 2-iodo-2-(3-oxo-5-phenyl-1,3-dihydrobenzo[c]oxepin-1-yl)acetate (4b)**

The general procedure was applied to **3b** (0.15 mmol), NIS (0.45 mmol), NaO<sup>t</sup>Bu (0.15 mmol), MeCN (0.5 mL) in a 35 mL sealed tube was stirred at rt for 12 h under an atmosphere of air. The crude product was purified by prepared column chromatography ( $R_f$  = 0.6, PE/EtOAc = 5/1) to afford the title compound as white solid (41.6 mg, 62% yield). **<sup>1</sup>H NMR (400 MHz, CDCl<sub>3</sub>)**  $\delta$  7.56-7.52 (m, 2H), 7.49-7.39 (m, 6H), 7.16 (d,  $J$  = 7.6 Hz, 1H), 6.58 (s, 1H), 5.89 (d,  $J$  = 11.6 Hz, 1H), 5.00 (d,  $J$  = 11.2 Hz, 1H), 4.41-4.26 (m, 2H), 1.33 (t,  $J$  = 7.2 Hz, 3H). **<sup>13</sup>C NMR (101 MHz, CDCl<sub>3</sub>)**  $\delta$  169.4, 166.2, 151.5, 140.1, 137.8, 134.5, 131.1, 129.9, 129.8, 129.4, 129.3, 128.8, 125.6, 120.0, 76.6, 62.7, 15.8, 13.9. HRMS (ESI) exact mass calculated for [M+Na]<sup>+</sup> (C<sub>20</sub>H<sub>17</sub>O<sub>4</sub>INa): 471.0064, found: 471.0031.

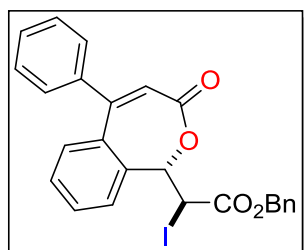

**benzyl 2-iodo-2-(3-oxo-5-phenyl-1,3-dihydrobenzo[c]oxepin-1-yl)acetate (**4c**)**

The general procedure was applied to **3c** (0.15 mmol), NIS (0.45 mmol), NaO<sup>t</sup>Bu (0.15 mmol), MeCN (0.5 mL) in a 35 mL sealed tube was stirred at rt for 12 h under an atmosphere of air. The crude product was purified by prepared column chromatography ( $R_f$  = 0.5, PE/EtOAc = 5/1) to afford the title compound as white solid (50.4 mg, 66% yield). **<sup>1</sup>H NMR (400 MHz, CDCl<sub>3</sub>)**  $\delta$  7.54-7.44 (m, 4H), 7.43-7.34 (m, 9H), 7.15 (d,  $J$  = 7.6 Hz, 1H), 6.54 (s, 1H), 5.90 (d,  $J$  = 11.2 Hz, 1H), 5.34 (d,  $J$  = 8.0 Hz, 1H), 5.25 (d,  $J$  = 12.4 Hz, 1H), 5.06 (d,  $J$  = 11.2 Hz, 1H). **<sup>13</sup>C NMR (101 MHz, CDCl<sub>3</sub>)**  $\delta$  169.2, 166.2, 151.5, 140.1, 137.8, 134.9, 134.4, 131.2, 129.9, 129.8, 129.4, 129.3, 128.8, 128.7, 128.6, 125.6, 120.0, 76.5, 68.4, 15.7. HRMS (ESI) exact mass calculated for [M+Na]<sup>+</sup> (C<sub>25</sub>H<sub>19</sub>O<sub>4</sub>INa): 533.0220, found: 533.0197.

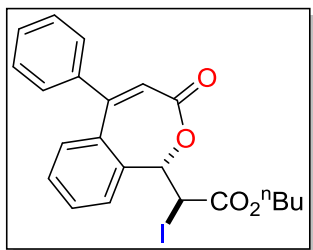

**butyl 2-iodo-2-(3-oxo-5-phenyl-1,3-dihydrobenzo[c]oxepin-1-yl)acetate (4d)**

The general procedure was applied to **3d** (0.15 mmol), NIS (0.45 mmol), NaO<sup>t</sup>Bu (0.15 mmol), MeCN (0.5 mL) in a 35 mL sealed tube was stirred at rt for 12 h under an atmosphere of air. The crude product was purified by prepared column chromatography ( $R_f$  = 0.6, PE/EtOAc = 5/1) to afford the title compound as white solid (66.4 mg, 93% yield). **<sup>1</sup>H NMR (400 MHz, CDCl<sub>3</sub>)**  $\delta$  7.56-7.49 (m, 2H), 7.47-7.37 (m, 6H), 7.16 (d,  $J$  = 7.6 Hz, 1H), 6.58 (s, 1H), 5.89 (d,  $J$  = 11.2 Hz, 1H), 5.01 (d,  $J$  = 11.2 Hz, 1H), 4.35-4.21 (m, 2H), 1.73-1.66 (m, 2H), 1.49-1.40 (m, 2H), 0.96 (t,  $J$  = 7.2 Hz, 3H). **<sup>13</sup>C NMR (101 MHz, CDCl<sub>3</sub>)**  $\delta$  169.4, 166.2, 151.4, 140.1, 137.8, 134.5, 131.1, 129.9, 129.8, 129.4, 129.3, 128.8, 125.6, 120.0, 76.5, 66.5, 34.4, 19.1, 15.8, 13.8. HRMS (ESI) exact mass calculated for  $[M+Na]^+$  (C<sub>22</sub>H<sub>21</sub>O<sub>4</sub>INa): 499.0377, found: 499.0345.

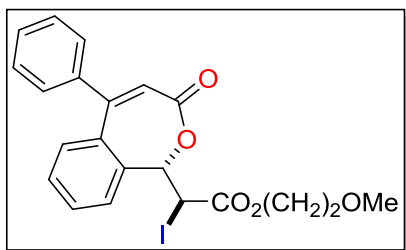

**2-methoxyethyl 2-iodo-2-(3-oxo-5-phenyl-1,3-dihydrobenzo[c]oxepin-1-yl)acetate (4e)**

The general procedure was applied to **3e** (0.15 mmol), NIS (0.45 mmol), NaO<sup>t</sup>Bu (0.15 mmol), MeCN (0.5 mL) in a 35 mL sealed tube was stirred at rt for 12 h under an atmosphere of air. The crude product was purified by prepared column chromatography ( $R_f$  = 0.5, PE/EtOAc = 3/1) to afford the title compound as white solid (67.4 mg, 94% yield). **<sup>1</sup>H NMR (400 MHz, CDCl<sub>3</sub>)**  $\delta$  7.54-7.39 (m, 8H), 7.16-7.13 (m, 1H), 6.57 (d,  $J$  = 3.2 Hz, 1H), 5.90 (d,  $J$  = 11.6 Hz, 1H), 5.06 (d,  $J$  = 11.2 Hz, 1H), 4.51-4.34 (m, 2H), 3.66-3.62 (m, 2H), 3.41 (t,  $J$  = 5.6 Hz, 3H). **<sup>13</sup>C NMR (101 MHz, CDCl<sub>3</sub>)**  $\delta$  169.3,

166.1, 151.4, 140.1, 137.7, 134.4, 131.1, 129.8, 129.4, 129.2, 128.7, 125.5, 120.0, 76.5, 70.1, 65.3, 59.0, 15.4. HRMS (ESI) exact mass calculated for  $[M+Na]^+$  ( $C_{21}H_{19}O_5INa$ ): 501.0169, found: 501.0136.

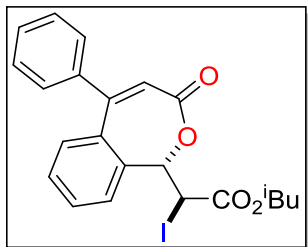

**isobutyl 2-iodo-2-(3-oxo-5-phenyl-1,3-dihydrobenzo[c]oxepin-1-yl)acetate (4f)**

The general procedure was applied to **3f** (0.15 mmol), NIS (0.45 mmol), NaO<sup>t</sup>Bu (0.15 mmol), MeCN (0.5 mL) in a 35 mL sealed tube was stirred at rt for 12 h under an atmosphere of air. The crude product was purified by prepared column chromatography ( $R_f$  = 0.6, PE/EtOAc = 5/1) to afford the title compound as white solid (68.5 mg, 78% yield). <sup>1</sup>H NMR (400 MHz, CDCl<sub>3</sub>)  $\delta$  7.57-7.49 (m, 2H), 7.48-7.38 (m, 6H), 7.16 (d,  $J$  = 7.6 Hz, 1H), 6.58 (s, 1H), 5.89 (d,  $J$  = 11.6 Hz, 1H), 5.03 (d,  $J$  = 11.2 Hz, 1H), 4.12-4.00 (m, 2H), 2.09-1.99 (m, 1H), 1.00 (d,  $J$  = 1.2 Hz, 3H), 0.99 (d,  $J$  = 1.0 Hz, 3H). <sup>13</sup>C NMR (101 MHz, CDCl<sub>3</sub>)  $\delta$  169.3, 166.2, 151.4, 140.1, 137.7, 134.5, 131.1, 129.9, 129.8, 129.4, 129.3, 128.8, 125.6, 120.0, 76.5, 72.5, 27.8, 19.2, 15.8. HRMS (ESI) exact mass calculated for  $[M+Na]^+$  ( $C_{22}H_{21}O_4INa$ ): 499.0377, found: 499.0348.

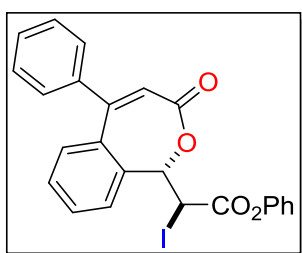

**phenyl 2-iodo-2-(3-oxo-5-phenyl-1,3-dihydrobenzo[c]oxepin-1-yl)acetate (4g)**

The general procedure was applied to **3g** (0.15 mmol), NIS (0.45 mmol), NaO<sup>t</sup>Bu (0.15 mmol), MeCN (0.5 mL) in a 35 mL sealed tube was stirred at rt for 12 h under an atmosphere of air. The crude product was purified by prepared column chromatography ( $R_f$  = 0.6, PE/EtOAc = 5/1) to afford the title compound as white solid (26.8 mg, 36% yield). <sup>1</sup>H NMR (400 MHz, CDCl<sub>3</sub>)  $\delta$  7.62-7.54 (m, 2H), 7.48-7.41 (m, 8H), 7.29 (d,

$J = 7.6$  Hz, 1H), 7.20 (d,  $J = 8.0$  Hz, 3H), 6.60 (s, 1H), 6.00 (d,  $J = 11.6$  Hz, 1H), 5.24 (d,  $J = 11.6$  Hz, 1H).  $^{13}\text{C}$  NMR (101 MHz,  $\text{CDCl}_3$ )  $\delta$  168.1, 166.2, 151.7, 150.5, 140.2, 137.8, 134.3, 131.4, 130.0, 130.0, 129.7, 129.6, 129.3, 128.8, 126.6, 125.5, 121.2, 120.0, 76.7, 15.4. HRMS (ESI) exact mass calculated for  $[\text{M}+\text{Na}]^+$  ( $\text{C}_{24}\text{H}_{17}\text{O}_4\text{INa}$ ): 519.0064, found: 519.0031.

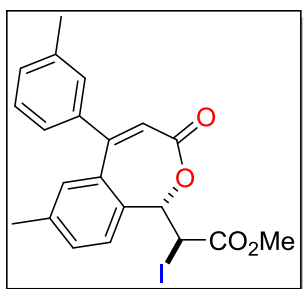

**methyl 2-iodo-2-(7-methyl-3-oxo-5-(m-tolyl)-1,3-dihydrobenzo[c]oxepin-1-yl)acetate (4h)**

The general procedure was applied to **3h** (0.15 mmol), NIS (0.45 mmol),  $\text{NaO}^t\text{Bu}$  (0.15 mmol), MeCN (0.5 mL) in a 35 mL sealed tube was stirred at rt for 12 h under an atmosphere of air. The crude product was purified by prepared column chromatography ( $R_f = 0.5$ , PE/EtOAc = 5/1) to afford the title compound as white solid (61.6 mg, 89% yield).  $^1\text{H}$  NMR (400 MHz,  $\text{CDCl}_3$ )  $\delta$  7.43 (d,  $J = 8.0$  Hz, 1H), 7.33-7.28 (m, 3H), 7.22 (s, 1H), 7.18 (d,  $J = 7.2$  Hz, 1H), 6.95 (s, 1H), 6.53 (s, 1H), 5.86 (d,  $J = 11.2$  Hz, 1H), 5.01 (d,  $J = 11.6$  Hz, 1H), 3.86 (s, 3H), 2.40 (s, 3H), 2.31 (s, 3H).  $^{13}\text{C}$  NMR (101 MHz,  $\text{CDCl}_3$ )  $\delta$  170.1, 166.4, 151.8, 140.2, 139.6, 138.6, 137.8, 131.6, 131.5, 130.6, 129.8, 128.6, 126.5, 125.5, 119.9, 76.5, 53.6, 21.5, 21.3, 15.4. HRMS (ESI) exact mass calculated for  $[\text{M}+\text{Na}]^+$  ( $\text{C}_{21}\text{H}_{19}\text{O}_4\text{INa}$ ): 485.0220, found: 485.0186.

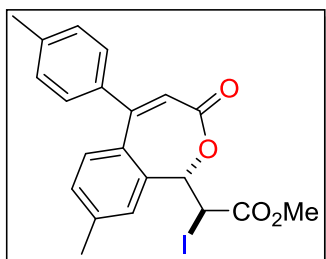

**methyl 2-iodo-2-(8-methyl-3-oxo-5-(p-tolyl)-1,3-dihydrobenzo[c]oxepin-1-yl)acetate (4i)**

The general procedure was applied to **3i** (0.15 mmol), NIS (0.45 mmol), NaO<sup>t</sup>Bu (0.15 mmol), MeCN (0.5 mL) in a 35 mL sealed tube was stirred at rt for 12 h under an atmosphere of air. The crude product was purified by prepared column chromatography ( $R_f$  = 0.5, PE/EtOAc = 5/1) to afford the title compound as white solid (34.6 mg, 50% yield). **<sup>1</sup>H NMR (400 MHz, CDCl<sub>3</sub>)**  $\delta$  7.32-7.28 (m, 3H), 7.24-7.19 (m, 3H), 7.05 (d,  $J$  = 8 Hz, 1H), 6.51 (s, 1H), 5.85 (d,  $J$  = 11.2 Hz, 1H), 5.00 (d,  $J$  = 11.2 Hz, 1H), 3.87 (s, 3H), 2.46 (s, 3H), 2.42 (s, 3H). **<sup>13</sup>C NMR (101 MHz, CDCl<sub>3</sub>)**  $\delta$  170.1, 166.6, 151.7, 140.2, 140.1, 137.4, 135.2, 134.3, 131.2, 130.1, 129.9, 129.5, 129.3, 126.2, 118.7, 76.5, 21.8, 21.4, 15.4. HRMS (ESI) exact mass calculated for [M+Na]<sup>+</sup> (C<sub>21</sub>H<sub>19</sub>O<sub>4</sub>INa): 485.0220, found: 485.0194.

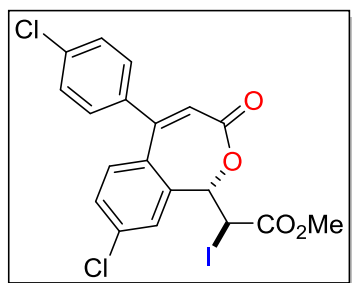

**methyl 2-(8-chloro-5-(4-chlorophenyl)-3-oxo-1,3-dihydrobenzo[c]oxepin-1-yl)-2-iodoacetate (**4j**)**

The general procedure was applied to **3j** (0.15 mmol), NIS (0.45 mmol), NaO<sup>t</sup>Bu (0.15 mmol), MeCN (0.5 mL) in a 35 mL sealed tube was stirred at rt for 12 h under an atmosphere of air. The crude product was purified by prepared column chromatography ( $R_f$  = 0.5, PE/EtOAc = 5/1) to afford the title compound as white solid (72.3 mg, 96% yield). **<sup>1</sup>H NMR (400 MHz, CDCl<sub>3</sub>)**  $\delta$  7.53 (d,  $J$  = 2.0 Hz, 1H), 7.44-7.38 (m, 3H), 7.34 (s, 1H), 7.31 (s, 1H), 7.08 (d,  $J$  = 8.4 Hz, 1H), 6.56 (s, 1H), 5.83 (d,  $J$  = 11.2 Hz, 1H), 4.95 (d,  $J$  = 11.2 Hz, 1H), 3.87 (s, 3H). **<sup>13</sup>C NMR (101 MHz, CDCl<sub>3</sub>)**  $\delta$  169.7, 165.5, 149.2, 138.0, 136.4, 136.3, 136.2, 135.7, 132.3, 130.5, 129.8, 129.2, 126.4, 120.5, 76.0, 53.8, 14.5. HRMS (ESI) exact mass calculated for [M+Na]<sup>+</sup> (C<sub>19</sub>H<sub>13</sub>Cl<sub>2</sub>O<sub>4</sub>INa): 524.9128/ 526.9098, found: 524.9098/ 526.9068.

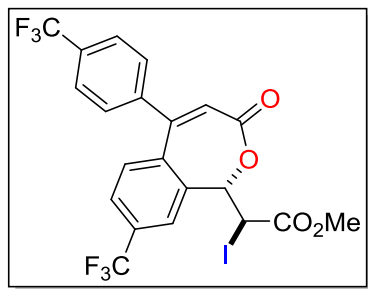

**Methyl 2-iodo-2-(3-oxo-8-(trifluoromethyl)-5-(4-(trifluoromethyl)phenyl)-1,3-dihydrobenzo[c]oxepin-1-yl)acetate (**4k**)**

The general procedure was applied to **3k** (0.15 mmol), NIS (0.45 mmol), NaO<sup>t</sup>Bu (0.15 mmol), MeCN (0.5 mL) in a 35 mL sealed tube was stirred at rt for 12 h under an atmosphere of air. The crude product was purified by prepared column chromatography ( $R_f$  = 0.6, PE/EtOAc = 5/1) to afford the title compound as white solid (70.9 mg, 83% yield). <sup>1</sup>H NMR (400 MHz, CDCl<sub>3</sub>) δ 7.81 (s, 1H), 7.74 (d,  $J$  = 8.4 Hz, 2H), 7.68 (d,  $J$  = 8.4 Hz, 1H), 7.53 (d,  $J$  = 8.0 Hz, 2H), 7.27 (s, 1H), 6.71 (s, 1H), 5.92 (d,  $J$  = 11.2 Hz, 1H), 5.03 (d,  $J$  = 11.6 Hz, 1H), 3.89 (s, 3H). <sup>13</sup>C NMR (101 MHz, CDCl<sub>3</sub>) δ 169.7, 164.9, 148.5, 142.8, 140.5, 135.5, 132.3 (q,  $J$  = 33.1 Hz), 132.0 (q,  $J$  = 34.3 Hz), 131.4, 129.6, 126.5 (q,  $J$  = 3.5 Hz), 126.1 (q,  $J$  = 3.5 Hz), 123.8 (q,  $J$  = 273.4 Hz), 123.5 (q,  $J$  = 3.7 Hz), 123.4 (q,  $J$  = 274.0 Hz), 123.0, 76.2, 53.9, 14.3. HRMS (ESI) exact mass calculated for [M+Na]<sup>+</sup> (C<sub>21</sub>H<sub>13</sub>F<sub>6</sub>O<sub>4</sub>INa): 592.9655, found: 592.9616.

## 2.4 General Procedures for Synthetic Application

### a) gram scale reaction

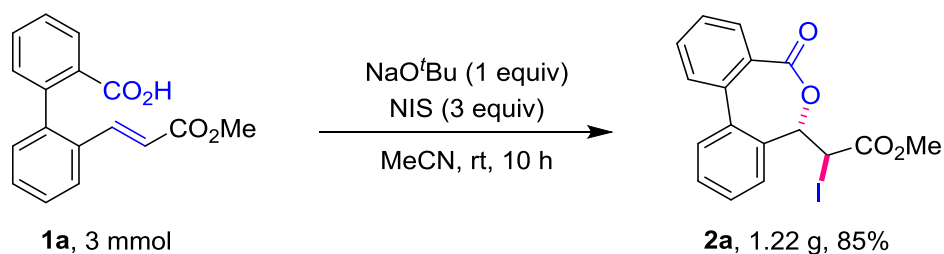

A mixture of **1a** (3 mmol), NIS (9 mmol), NaO<sup>t</sup>Bu (3 mmol), MeCN (5 mL) in a 35 mL sealed tube was stirred at rt for 10 h under an atmosphere of air. The reaction mixture was filtered through a pad of silica and concentrated under a reduced pressure. The



crude product was purified by column chromatography on silica to give the corresponding product **2a** (85%, 1.22g).

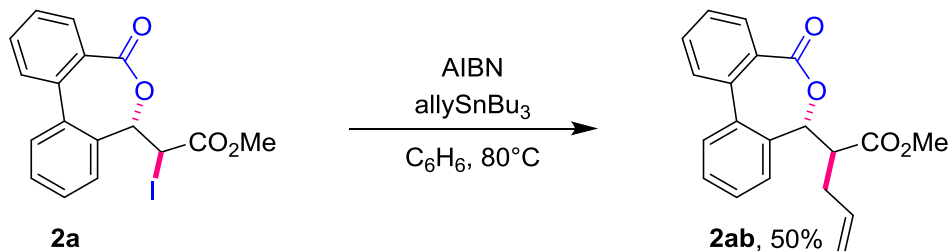

A 25 mL reaction Schlenk tube equipped with a magnetic stir bar was charged with iodolactone **2a** (81.6 mg, 0.20 mmol), Bu<sub>3</sub>SnH (110  $\mu$ L, 0.40 mmol), and benzene (2.0 mL). The mixture was degassed (freeze-pump-thaw, 3 cycles) and then heated to 80 °C. One portion of AIBN (2 mg, 0.05 eq) was added, and the mixture was stirred for 30 minutes. A second portion of AIBN (2 mg, 0.05 eq) was added, and the mixture was stirred for another 30 minutes until full conversion was achieved. Then the reaction was cooled to room temperature and the mixture was filtered through a pad of silica and concentrated under a reduced pressure. The crude product was purified by prepared column chromatography ( $R_f$  = 0.47, PE/EtOAc = 6/1) to yield a colorless oil **2ac** (46.2 mg, 84% yield). <sup>1</sup>H NMR (400 MHz, CDCl<sub>3</sub>)  $\delta$  8.00 (d,  $J$  = 7.2 Hz, 1H), 7.69 (td,  $J$  = 7.6 Hz,  $J$  = 1.2 Hz, 1H), 7.64-7.60 (m, 2H), 7.57-7.52 (m, 2H), 7.49-7.41 (m, 2H), 5.65 (dd,  $J$  = 8.8 Hz,  $J$  = 5.2 Hz, 1H), 3.73 (s, 3H), 3.38 (dd,  $J$  = 16.4 Hz,  $J$  = 8.8 Hz, 1H), 3.20 (dd,  $J$  = 16.4 Hz,  $J$  = 5.2 Hz, 1H). <sup>13</sup>C NMR (101 MHz, CDCl<sub>3</sub>)  $\delta$  170.4, 169.5, 139.0, 137.2, 135.8, 132.9, 131.7, 130.6, 130.1, 129.5, 129.0, 128.8, 128.8, 123.7, 73.3, 52.4, 36.1. HRMS (ESI) exact mass calculated for [M+Na]<sup>+</sup> (C<sub>17</sub>H<sub>14</sub>NaO<sub>4</sub>): 305.0784, found: 305.0778.

## 2.5 General Procedures for Mechanistic Experiments

a) evaluate substituent effect on the regioselectivity

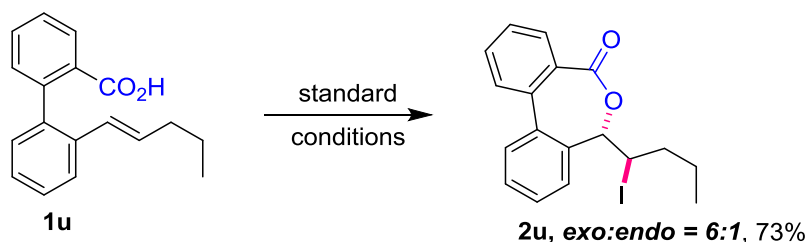

The general procedure was applied to **1u** (0.15 mmol), NIS (0.45 mmol), NaO<sup>t</sup>Bu (0.15 mmol), MeCN (0.5 mL) in a 35 mL sealed tube was stirred at rt for 12 h under an atmosphere of air. The crude product was purified by prepared column chromatography ( $R_f$  = 0.6, PE/EtOAc = 15/1) to afford the product as light yellow solid (43 mg, 73%

yield). **<sup>1</sup>H NMR (400 MHz, CDCl<sub>3</sub>)** δ 7.98 (d, *J* = 8.0 Hz, 1H), 7.71 (d, *J* = 7.2 Hz, 1H), 7.67-7.65 (m, 1H), 7.60-7.56 (m, 3H), 7.54-7.51 (m, 1H), 7.50-7.48 (m, 1H), 5.27 (d, *J* = 10.4 Hz, 1H), 4.74 (t, *J* = 10.0 Hz, 1H), 2.27 (s, 1H), 2.00-1.91 (m, 1H), 1.77-1.68 (m, 1H), 1.59-1.48 (m, 1H), 4.74 (t, *J* = 7.2 Hz, 3H). **<sup>13</sup>C NMR (101 MHz, CDCl<sub>3</sub>)** δ 168.6, 138.8, 137.5, 135.1, 132.9, 131.2, 130.1, 129.6, 129.5, 128.8, 128.7, 128.2, 125.4, 37.5, 30.2, 22.5, 13.3. HRMS (ESI) exact mass calculated for [M+Na]<sup>+</sup> (C<sub>18</sub>H<sub>17</sub>IO<sub>2</sub>Na): 415.0165, found: 415.0154.

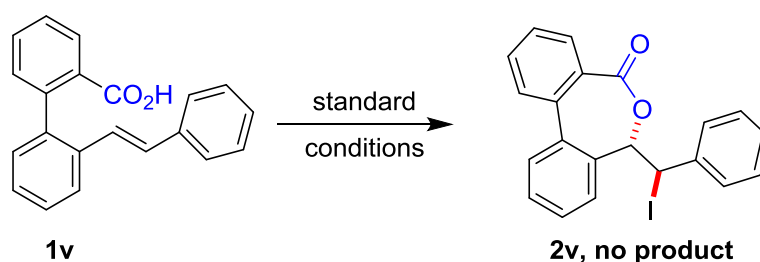

A mixture of **1v** (0.15 mmol), NIS (0.45 mmol) NaO<sup>t</sup>Bu (0.15 mmol), MeCN (0.5 mL) in a 35 mL sealed tube was stirred at rt for 12 h under an atmosphere of air. However, the product **2v** was not observed.

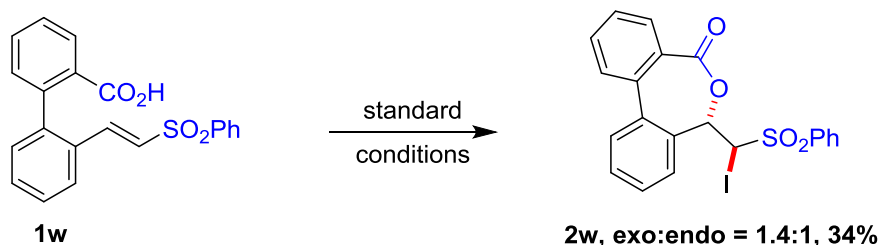

A mixture of **1w** (0.15 mmol), NIS (0.45 mmol) NaO<sup>t</sup>Bu (0.15 mmol), MeCN (0.5 mL) in a 35 mL sealed tube was stirred at rt for 12 h under an atmosphere of air. The crude product was purified by prepared column chromatography (*R<sub>f</sub>* = 0.3, PE/EtOAc = 3/1) to afford the mixed product (25 mg, 34% yield). **<sup>1</sup>H NMR (400 MHz, CDCl<sub>3</sub>)** δ 8.03 (d, *J* = 7.6 Hz, 2H), 7.99-7.94 (m, 3H), 7.81-7.55 (m, 1H), 7.73-7.67 (m, 4H), 7.65-7.59 (m, 6H), 7.57-7.41 (m, 9H), 7.38-7.36 (m, 1H), 5.90 (d, *J* = 10.8 Hz, 1H), 5.68 (d, *J* = 10.8 Hz, 1H), 5.62 (d, *J* = 11.6 Hz, 1H), 5.33 (d, *J* = 11.6 Hz, 1H).

### 3. DFT Calculations

#### 3.1 Computational Details

All the geometry of reactants, intermediate and transition states were fully optimized by using M06-2X functional<sup>2</sup> with BSI basis set (BSI designates the basis set combination of LANL2DZ<sup>3</sup> for I atom and 6-31G(d,p) for other atoms). Frequency for all species were calculated at the same level in order to verify the intermediate and

transition state. Moreover, aiming to obtain more accuracy thermodynamics, single-point energy calculations were performed at the M06-2X/BSII level (BSII designates the basis set combination of SDD<sup>4</sup> for I atom and 6-311++G(d, p) for other atoms) based on the optimized structures. The bulk solvent effect of CH<sub>3</sub>CN were considered by using Truhlar and coworkers' SMD solvation model.<sup>5</sup> All the calculations were carried out using the Gaussian 09 program<sup>6</sup>, and all the structures were generated by CYLview.<sup>7</sup>

After the formation of intermediate A, the reaction could accomplish through deprotonation following by carboxylation as exhibited in Figure S2. The deprotonation was proposed to produce an intermediate containing containing zwitterion structure. However, such intermediate is unstable. Thus it tends to isomerize to the intermediate with five-membered ring lactone (see **1A-iso**). The carboxylation could achieve by attacking the C-C-I moiety through both  $\alpha$ -C and  $\beta$ -C. The corresponding trantions state is **TS<sub>AC-iso</sub>** and **TS<sub>AB-iso</sub>** respectively. Unfortunately, the free energy barrier of these two peocesses are extremely high ( 38.2 kcal/mol and 64.6 kcal/mol respectively). As a result, this mechanism is of no importance.

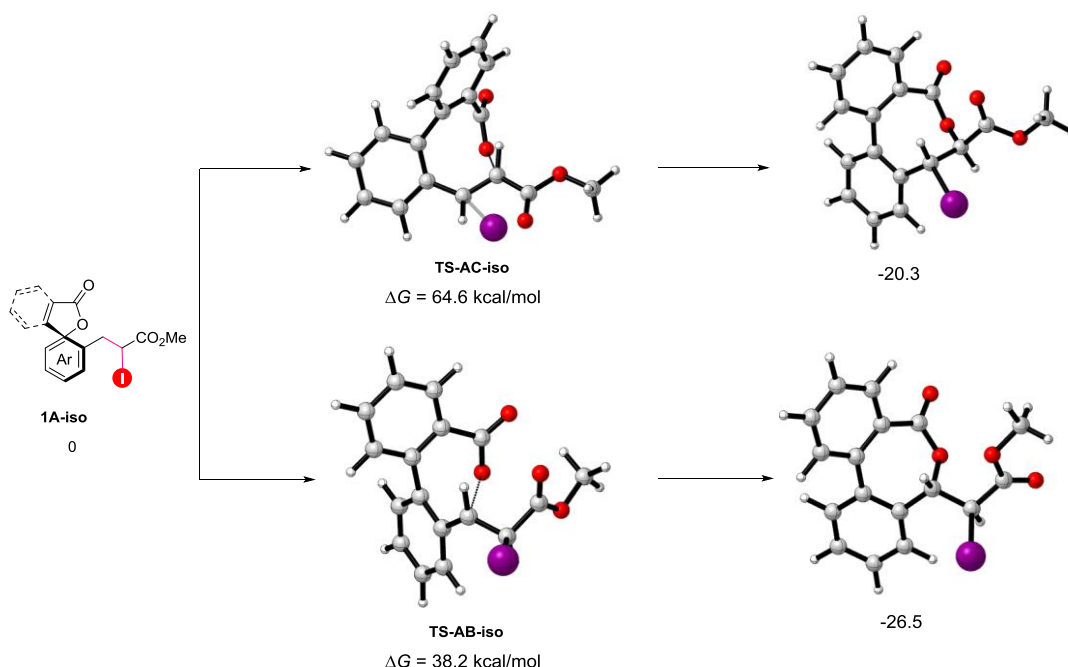

Figure S1. The reaction mechanism takes place through deprotonation following by carboxylation.

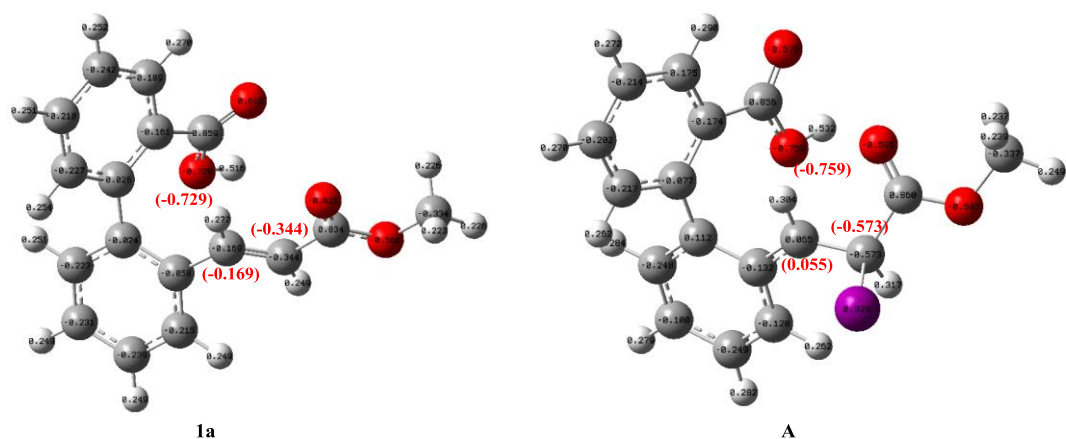

**Figure S2.** The NPA charge of intermediate **1a** and **A**.

### 3.2 Optimized cartesian coordinates (xyz)

**A**

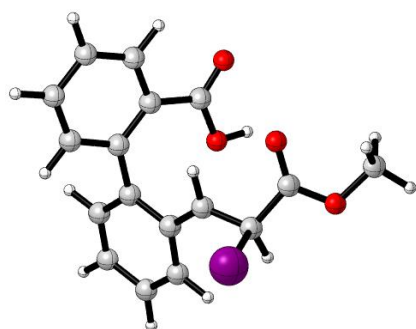

|   |             |             |            |
|---|-------------|-------------|------------|
| C | -0.95743200 | -3.36580200 | -1.9777780 |
| C | -0.10119500 | -2.40317100 | -1.5052110 |
| C | -0.59611000 | -1.31803800 | -0.7247410 |
| C | -2.00154500 | -1.20688900 | -0.4466820 |
| C | -2.84233700 | -2.19804700 | -0.9453970 |
| C | -2.33126700 | -3.25356700 | -1.6968480 |
| H | -0.58659300 | -4.20052600 | -2.5604680 |
| H | 0.96414900  | -2.48331900 | -1.6970910 |
| H | -3.90887600 | -2.12939700 | -0.7613620 |
| H | -3.01355600 | -4.00621600 | -2.0803270 |
| C | -2.58407300 | -0.13324400 | 0.4010870  |
| C | -2.52561300 | 1.25942300  | 0.1615350  |
| C | -3.25909400 | -0.58764600 | 1.5428530  |
| C | -3.11451600 | 2.13594900  | 1.0764900  |
| C | -3.83117500 | 0.29913700  | 2.4479960  |
| H | -3.30973900 | -1.65523700 | 1.7328320  |
| C | -3.75386600 | 1.66819300  | 2.2174780  |
| H | -3.06952500 | 3.19654900  | 0.8563730  |
| H | -4.33501900 | -0.08391600 | 3.3286700  |
| H | -4.19996200 | 2.36917000  | 2.9139230  |
| C | 0.24040300  | -0.31108000 | -0.2582830 |

|   |             |             |            |
|---|-------------|-------------|------------|
| C | 1.64073500  | -0.07719800 | -0.5966800 |
| H | -0.17003000 | 0.44082700  | 0.4142730  |
| H | 2.04579800  | -0.61321400 | -1.4517820 |
| C | -1.96276000 | 1.93548400  | -1.0548670 |
| O | -2.03885700 | 3.11836100  | -1.2501940 |
| O | -1.37237100 | 1.10535500  | -1.9450520 |
| H | -1.12245500 | 1.66745000  | -2.6969750 |
| C | 1.93614800  | 1.41971600  | -0.6576740 |
| O | 1.15717600  | 2.24951100  | -0.2633810 |
| O | 3.11686400  | 1.63915900  | -1.1988490 |
| I | 2.60691500  | -0.92029500 | 1.1875910  |
| C | 3.51050900  | 3.02440900  | -1.2792930 |
| H | 4.48922000  | 3.01977100  | -1.7511290 |
| H | 2.78700200  | 3.57944300  | -1.8771730 |
| H | 3.55972200  | 3.44942000  | -0.2761840 |

**TS-AB**

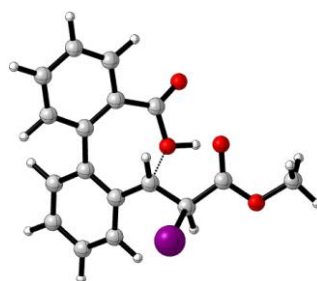

|   |            |            |             |
|---|------------|------------|-------------|
| C | 0.83692700 | 3.42456400 | -1.73747400 |
| C | 0.05128100 | 2.36022400 | -1.33527200 |
| C | 0.62890000 | 1.26303700 | -0.67107700 |
| C | 2.02399100 | 1.21726300 | -0.42905400 |
| C | 2.79807500 | 2.29323600 | -0.86590300 |
| C | 2.21383700 | 3.38216800 | -1.50733200 |

|   |             |             |             |
|---|-------------|-------------|-------------|
| H | 0.38911200  | 4.27793900  | -2.23289000 |
| H | -1.02069000 | 2.39557500  | -1.50218400 |
| H | 3.87255900  | 2.26629100  | -0.72013700 |
| H | 2.84064100  | 4.20386700  | -1.83774200 |
| C | 2.69828300  | 0.10072700  | 0.29275300  |
| C | 2.57664100  | -1.28324300 | 0.01778000  |
| C | 3.57349000  | 0.48275100  | 1.31781900  |
| C | 3.33017900  | -2.21162500 | 0.74791500  |
| C | 4.30190900  | -0.44893300 | 2.04908100  |
| H | 3.66714600  | 1.53733000  | 1.55493700  |
| C | 4.18554200  | -1.80435100 | 1.76097200  |
| H | 3.22875300  | -3.26167500 | 0.49787100  |
| H | 4.96014000  | -0.11054500 | 2.84193300  |
| H | 4.75476600  | -2.53938900 | 2.31825000  |
| C | -0.14478800 | 0.11505300  | -0.29217000 |
| C | -1.58777000 | -0.05551500 | -0.57099500 |
| H | 0.21286600  | -0.50134900 | 0.53080900  |
| H | -1.94391000 | 0.42642700  | -1.48029600 |
| C | 1.73359100  | -1.92166500 | -1.02546500 |
| O | 1.82170600  | -3.04438400 | -1.41974800 |
| O | 0.72009900  | -1.11894800 | -1.56576200 |
| H | 0.16351400  | -1.73522600 | -2.07991100 |
| C | -2.03099800 | -1.51165700 | -0.49906500 |
| O | -1.29005800 | -2.40076600 | -0.15441500 |
| O | -3.28423400 | -1.64348400 | -0.87908900 |
| I | -2.51393400 | 1.02017900  | 1.09510600  |
| C | -3.81734800 | -2.98230000 | -0.81471100 |
| H | -4.84475600 | -2.90006200 | -1.15821300 |
| H | -3.23801700 | -3.64253300 | -1.46091100 |
| H | -3.77416200 | -3.34385800 | 0.21315500  |

#### TS-AC

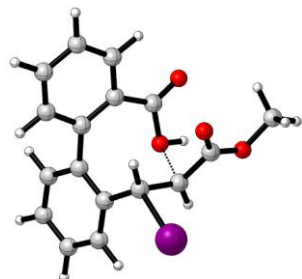

|   |             |             |            |
|---|-------------|-------------|------------|
| C | 0.17475100  | -3.69586000 | 1.62966600 |
| C | -0.54267500 | -2.69577600 | 0.98246000 |
| C | 0.12287600  | -1.64129200 | 0.36112100 |
| C | 1.52820900  | -1.57248700 | 0.39025600 |
| C | 2.23194700  | -2.58917600 | 1.04027600 |

|   |             |             |             |
|---|-------------|-------------|-------------|
| C | 1.56434500  | -3.64019200 | 1.66057500  |
| H | -0.35253500 | -4.51841800 | 2.09941600  |
| H | -1.62583600 | -2.75371800 | 0.94229000  |
| H | 3.31638600  | -2.54459500 | 1.05898000  |
| H | 2.13085500  | -4.41754900 | 2.16128600  |
| C | 2.30819500  | -0.51978000 | -0.33285800 |
| C | 2.32517900  | 0.87005000  | -0.06307700 |
| C | 3.11997300  | -0.98304100 | -1.37361500 |
| C | 3.12334400  | 1.73011200  | -0.83409200 |
| C | 3.90632400  | -0.12251200 | -2.13389000 |
| H | 3.11890600  | -2.04585500 | -1.59255700 |
| C | 3.90610900  | 1.24345900  | -1.86820300 |
| H | 3.11897800  | 2.78713500  | -0.59328900 |
| H | 4.51670600  | -0.52394100 | -2.93587000 |
| H | 4.51331900  | 1.92185100  | -2.45614200 |
| C | -0.57174000 | -0.46659300 | -0.24297400 |
| C | -1.03112400 | 0.52536500  | 0.71629800  |
| H | -0.07411600 | -0.00668000 | -1.09698100 |
| H | -1.51721500 | 0.19871200  | 1.63212300  |
| C | 1.61657400  | 1.56896000  | 1.02602000  |
| O | 1.74664800  | 2.71136000  | 1.36124300  |
| O | 0.65739100  | 0.80580500  | 1.72686200  |
| H | 0.39936800  | 1.37002400  | 2.48302000  |
| C | -1.11680800 | 1.98744100  | 0.29992800  |
| O | -0.76392400 | 2.35835800  | -0.78580200 |
| O | -1.50191500 | 2.72257400  | 1.32392800  |
| I | -2.67097300 | -0.69093100 | -0.90716700 |
| C | -1.45646400 | 4.15334200  | 1.10490000  |
| H | -2.07841600 | 4.40944200  | 0.24730500  |
| H | -1.84234200 | 4.59647700  | 2.01849900  |
| H | -0.42220000 | 4.44958900  | 0.92517000  |

#### B

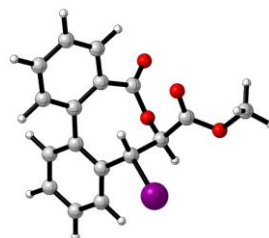

|   |             |            |            |
|---|-------------|------------|------------|
| C | -0.84085600 | 3.31791700 | 1.73841200 |
| C | -0.09456000 | 2.21409500 | 1.33989000 |
| C | -0.70474600 | 1.13984400 | 0.69615600 |
| C | -2.08615200 | 1.16616700 | 0.43835100 |

|   |             |             |             |   |             |             |             |
|---|-------------|-------------|-------------|---|-------------|-------------|-------------|
| C | -2.82465000 | 2.27722800  | 0.85938800  | C | 2.54418100  | -2.41493500 | 0.68947700  |
| C | -2.21104600 | 3.34435600  | 1.50390400  | C | 2.01715600  | -3.54993200 | 1.29595500  |
| H | -0.35127900 | 4.14793500  | 2.23503400  | H | 0.21988600  | -4.56430000 | 1.90875000  |
| H | 0.97463500  | 2.22532400  | 1.52540700  | H | -1.28167700 | -2.79355100 | 1.07488800  |
| H | -3.89741800 | 2.29026500  | 0.69819600  | H | 3.61805100  | -2.30837000 | 0.56827600  |
| H | -2.80426400 | 4.19351500  | 1.82489000  | H | 2.68129600  | -4.33262300 | 1.64572600  |
| C | -2.78866600 | 0.07551100  | -0.28993400 | C | 2.31720900  | -0.22568900 | -0.45980000 |
| C | -2.59552800 | -1.30508000 | -0.06325400 | C | 2.28970800  | 1.11586600  | -0.01677600 |
| C | -3.75682900 | 0.44214800  | -1.23335300 | C | 3.01063600  | -0.48025900 | -1.64524400 |
| C | -3.38107100 | -2.25553800 | -0.73052200 | C | 2.92782800  | 2.14268400  | -0.73565600 |
| C | -4.51327600 | -0.50517800 | -1.91203400 | C | 3.62933500  | 0.53628000  | -2.36873600 |
| H | -3.90525100 | 1.49573200  | -1.44480000 | H | 3.05000600  | -1.50298600 | -2.00545000 |
| C | -4.33382500 | -1.86264500 | -1.65611800 | C | 3.58463800  | 1.85409100  | -1.91966400 |
| H | -3.22565100 | -3.30441600 | -0.50238900 | H | 2.88935800  | 3.15743400  | -0.35402700 |
| H | -5.24692900 | -0.17917600 | -2.64180500 | H | 4.14902600  | 0.29442700  | -3.28991100 |
| H | -4.92925400 | -2.60625900 | -2.17335100 | H | 4.06347500  | 2.64810200  | -2.48065200 |
| C | 0.01400500  | -0.12889400 | 0.32034800  | C | -0.55132700 | -0.38093400 | -0.06235100 |
| C | 1.54584000  | -0.09629800 | 0.49744700  | C | -0.79755200 | 0.56170800  | 1.11498900  |
| H | -0.22244300 | -0.42222900 | -0.70952100 | H | -0.07220400 | 0.18068300  | -0.86463100 |
| H | 1.79268400  | 0.38705600  | 1.45025500  | H | -1.47340500 | 0.12171300  | 1.85167700  |
| C | -1.63775900 | -1.89894400 | 0.89487000  | C | 1.76337900  | 1.59829100  | 1.24716700  |
| O | -1.71338100 | -2.97542500 | 1.40613100  | O | 2.03233800  | 2.43396800  | 2.01169600  |
| O | -0.46624400 | -1.17987600 | 1.20189100  | O | 0.49740400  | 0.71133200  | 1.82054800  |
| C | 2.19056500  | -1.45725500 | 0.60408200  | H | 0.36852600  | 1.06216200  | 2.72315400  |
| O | 1.59366700  | -2.43552100 | 1.14480800  | C | -1.22024900 | 1.96261600  | 0.67144600  |
| O | 3.39347900  | -1.59230400 | 0.21217600  | O | -0.40854700 | 2.73426200  | 0.21782400  |
| I | 2.44895000  | 1.11826000  | -1.04253700 | O | -2.50464400 | 2.16832000  | 0.83562800  |
| C | 4.06397900  | -2.87384500 | 0.41557700  | I | -2.48118600 | -0.91976300 | -0.90130000 |
| H | 3.51773600  | -3.64611700 | -0.12456600 | C | -3.00545000 | 3.43273400  | 0.34792300  |
| H | 5.05927900  | -2.72633200 | 0.00848700  | H | -2.83428700 | 3.49954200  | -0.72709800 |
| H | 4.09051300  | -3.09204900 | 1.48262400  | H | -4.06746500 | 3.42874800  | 0.57640200  |
| H | 0.62060600  | -2.12753600 | 1.36670400  | H | -2.49401600 | 4.25005700  | 0.85693300  |

C

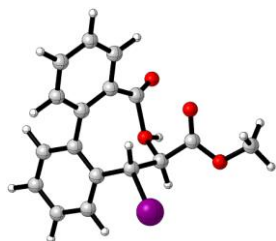

|   |             |             |            |
|---|-------------|-------------|------------|
| C | 0.63971800  | -3.67845700 | 1.44508200 |
| C | -0.20614600 | -2.67505500 | 0.98376700 |
| C | 0.31212600  | -1.53491300 | 0.37341400 |
| C | 1.70379100  | -1.39354100 | 0.23889200 |

2a

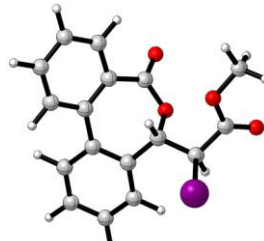

|   |             |            |            |
|---|-------------|------------|------------|
| C | -0.52453300 | 3.62703000 | 1.33556300 |
| C | 0.13863500  | 2.41879500 | 1.14606700 |
| C | -0.53009400 | 1.31946700 | 0.61481400 |
| C | -1.88766300 | 1.42441400 | 0.26847200 |

|   |             |             |             |
|---|-------------|-------------|-------------|
| C | -2.54512700 | 2.64189000  | 0.47455100  |
| C | -1.87093300 | 3.73599400  | 1.00328700  |
| H | 0.00884700  | 4.47624300  | 1.74876500  |
| H | 1.18965200  | 2.34666500  | 1.40601100  |
| H | -3.60205300 | 2.71971300  | 0.24019000  |
| H | -2.39929700 | 4.67004100  | 1.16243600  |
| C | -2.62641700 | 0.28338700  | -0.33467900 |
| C | -2.50060400 | -1.05424700 | 0.09371200  |
| C | -3.52710300 | 0.55533500  | -1.37471000 |
| C | -3.28640200 | -2.05385100 | -0.48890800 |
| C | -4.28174900 | -0.44786500 | -1.96657700 |
| H | -3.61338000 | 1.57558200  | -1.73416600 |
| C | -4.16647600 | -1.76217200 | -1.51977500 |
| H | -3.19167400 | -3.06260300 | -0.10245600 |
| H | -4.95887700 | -0.20295700 | -2.77835700 |
| H | -4.75856300 | -2.55118000 | -1.97045300 |
| C | 0.09280800  | -0.04301000 | 0.45406000  |
| C | 1.59438400  | -0.16108300 | 0.67193800  |
| H | -0.14256200 | -0.45519200 | -0.53267400 |
| H | 1.92554400  | 0.31857200  | 1.59144800  |
| C | -1.63893200 | -1.52763200 | 1.23048300  |
| O | -1.95520900 | -2.44953100 | 1.93410800  |
| O | -0.45924800 | -0.90473800 | 1.46199800  |
| C | 2.03563400  | -1.61116300 | 0.74189300  |
| O | 2.85374800  | -2.02139500 | 1.52117400  |
| O | 1.40566200  | -2.36374700 | -0.16618200 |
| I | 2.68153500  | 0.80795800  | -0.94537700 |
| C | 1.73231400  | -3.75456700 | -0.11682500 |
| H | 1.45500600  | -4.16755000 | 0.85479600  |
| H | 1.15716500  | -4.22196400 | -0.91333300 |
| H | 2.80273200  | -3.89620000 | -0.27618200 |

**2a-E**

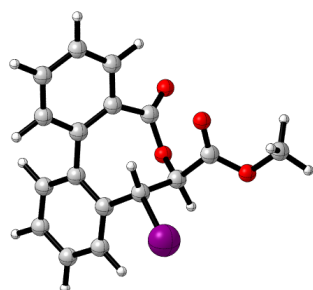

|   |             |            |             |
|---|-------------|------------|-------------|
| C | 0.83659300  | 3.66095700 | -1.43232300 |
| C | -0.04850900 | 2.70134500 | -0.95331800 |
| C | 0.42252500  | 1.52925900 | -0.36482700 |
| C | 1.80711900  | 1.30851800 | -0.27303000 |

|   |             |             |             |
|---|-------------|-------------|-------------|
| C | 2.68685300  | 2.28617800  | -0.74486000 |
| C | 2.20850800  | 3.45497900  | -1.32555400 |
| H | 0.45262200  | 4.56967700  | -1.88348800 |
| H | -1.11854000 | 2.87161300  | -1.02059300 |
| H | 3.75548200  | 2.11124300  | -0.66341100 |
| H | 2.90475100  | 4.20076500  | -1.69438900 |
| C | 2.36027700  | 0.09394800  | 0.39271300  |
| C | 2.13219200  | -1.22789800 | -0.03245500 |
| C | 3.16529100  | 0.29670100  | 1.52097300  |
| C | 2.69313000  | -2.29493000 | 0.67647000  |
| C | 3.70809200  | -0.76956600 | 2.22698100  |
| H | 3.34530200  | 1.31574200  | 1.84945000  |
| C | 3.46346900  | -2.07493400 | 1.80856200  |
| H | 2.51063900  | -3.29903600 | 0.31067700  |
| H | 4.31668400  | -0.58008500 | 3.10522500  |
| H | 3.87766200  | -2.91484000 | 2.35563800  |
| C | -0.47445100 | 0.41159900  | 0.08517000  |
| C | -0.74563400 | -0.54725300 | -1.08280500 |
| H | -0.02748300 | -0.14386500 | 0.90850100  |
| H | -1.41516500 | -0.07802700 | -1.80615000 |
| C | 1.43773200  | -1.62400200 | -1.30308300 |
| O | 1.79702900  | -2.57226900 | -1.94327800 |
| O | 0.43559300  | -0.83622200 | -1.81517300 |
| C | -1.34154200 | -1.85754900 | -0.57435500 |
| O | -0.74005400 | -2.59037100 | 0.17284200  |
| O | -2.55955000 | -2.08638500 | -1.05117800 |
| I | -2.39467500 | 1.03820700  | 0.91972200  |
| C | -3.17220100 | -3.29011500 | -0.57684200 |
| H | -4.14546800 | -3.33661100 | -1.05995200 |
| H | -2.56080500 | -4.15294900 | -0.84595800 |
| H | -3.27873600 | -3.25006600 | 0.5089670   |

**1A-iso**

|   |             |             |             |
|---|-------------|-------------|-------------|
| C | -1.27975900 | -0.24200500 | -3.38670500 |
| C | -0.33539300 | -0.19552800 | -2.42813400 |
| C | -0.56232100 | 0.51375000  | -1.17392700 |
| C | -2.01071100 | 0.85008400  | -0.83702800 |
| C | -2.88667100 | 1.00799700  | -2.05393200 |
| C | -2.55900300 | 0.44780700  | -3.22194500 |
| H | -1.08264100 | -0.75854700 | -4.32032400 |
| H | 0.62742600  | -0.66998000 | -2.58969000 |
| H | -3.82330300 | 1.53308900  | -1.89532200 |
| H | -3.23232900 | 0.51096800  | -4.07028700 |
| C | -2.59736400 | -0.22144000 | 0.07479200  |



|                  |             |             |             |                  |             |             |             |
|------------------|-------------|-------------|-------------|------------------|-------------|-------------|-------------|
| C                | -2.94654200 | 0.37089100  | 1.27305300  | H                | -4.20885300 | 0.24787500  | -3.58112300 |
| C                | -2.79565000 | -1.57876000 | -0.13975300 | H                | -4.20230200 | -2.18347200 | -3.09513700 |
| C                | -3.50362800 | -0.35265000 | 2.32107900  | C                | 0.31410300  | 0.46345500  | -0.04106800 |
| C                | -3.34941100 | -2.31623400 | 0.90445100  | C                | 1.64837900  | 0.12670500  | 0.47497100  |
| H                | -2.52522200 | -2.04560200 | -1.08186700 | H                | -0.09528700 | -0.26694100 | -0.73759600 |
| C                | -3.70021800 | -1.71429300 | 2.12085700  | H                | 1.97172200  | 0.73378800  | 1.31565500  |
| H                | -3.76867800 | 0.14059400  | 3.25031600  | C                | -1.86596800 | -1.54272200 | 0.93152300  |
| H                | -3.51349100 | -3.38120900 | 0.77508600  | O                | -1.74744100 | -2.75189200 | 1.13024200  |
| H                | -4.12957300 | -2.32136800 | 2.91057000  | O                | -1.43180800 | -0.57513900 | 1.64203900  |
| C                | 0.40709600  | 0.79475600  | -0.28510400 | C                | 1.54254100  | -1.35524600 | 0.87478500  |
| C                | 1.83103100  | 0.45807300  | -0.47223800 | O                | 1.35034800  | -2.23898000 | 0.08592300  |
| H                | 0.17264500  | 1.31178200  | 0.64127600  | O                | 1.59626700  | -1.45694400 | 2.18987800  |
| H                | 2.16220900  | 0.41529400  | -1.50723600 | I                | 3.07839700  | 0.42133500  | -1.14532600 |
| C                | -2.62747700 | 1.81443400  | 1.19223700  | C                | 1.15270400  | -2.72987400 | 2.70690200  |
| O                | -2.78763000 | 2.68355600  | 1.99904800  | H                | 0.11386000  | -2.88909900 | 2.40190600  |
| O                | -2.07843300 | 2.04364900  | -0.04357900 | H                | 1.79237600  | -3.52572700 | 2.32149200  |
| C                | 2.75207300  | 1.35262900  | 0.33155900  | H                | 1.24775000  | -2.64422300 | 3.78730200  |
| O                | 2.43573700  | 1.93217800  | 1.33784000  |                  |             |             |             |
| O                | 3.96283000  | 1.41625700  | -0.23029200 |                  |             |             |             |
| I                | 2.24347500  | -1.61663500 | 0.24785700  | <b>TS-AC-iso</b> |             |             |             |
| C                | 4.91277700  | 2.20369600  | 0.49096100  | C                | 1.21623500  | -3.82721300 | -0.99532300 |
| H                | 5.83413700  | 2.15815600  | -0.08577300 | C                | 0.23083200  | -2.85945100 | -1.07566100 |
| H                | 4.56076800  | 3.23304600  | 0.58047200  | C                | 0.49882900  | -1.51043700 | -0.79659400 |
| H                | 5.06085900  | 1.79105800  | 1.49088500  | C                | 1.81010000  | -1.11372900 | -0.46806600 |
|                  |             |             |             | C                | 2.79472400  | -2.10827300 | -0.40480400 |
| <b>TS-AB-iso</b> |             |             |             | C                | 2.50993300  | -3.44568400 | -0.64649900 |
| C                | -0.84456200 | 3.41650200  | 1.83831500  | H                | 0.97947300  | -4.86561700 | -1.19844300 |
| C                | 0.01318600  | 2.56499900  | 1.20530500  | H                | -0.78589300 | -3.14592700 | -1.33325300 |
| C                | -0.48715300 | 1.48867800  | 0.40937700  | H                | 3.80596900  | -1.80575300 | -0.15295900 |
| C                | -1.91425000 | 1.25511400  | 0.32197800  | H                | 3.29866600  | -4.18690700 | -0.57094000 |
| C                | -2.76244700 | 2.15982800  | 0.99355600  | C                | 2.31051100  | 0.29177200  | -0.30957300 |
| C                | -2.24247600 | 3.19851100  | 1.73117700  | C                | 2.19127800  | 1.02700800  | 0.88210700  |
| H                | -0.47125500 | 4.25197800  | 2.41892700  | C                | 3.09266700  | 0.80731800  | -1.35191400 |
| H                | 1.08624100  | 2.72037300  | 1.26305800  | C                | 2.85202600  | 2.25073700  | 1.00339800  |
| H                | -3.83425500 | 2.01410800  | 0.91989200  | C                | 3.71584900  | 2.04472800  | -1.23342900 |
| H                | -2.92023500 | 3.87876400  | 2.23889700  | H                | 3.21183900  | 0.22260500  | -2.25993700 |
| C                | -2.52975600 | 0.29234400  | -0.63233900 | C                | 3.60074300  | 2.76742800  | -0.04742700 |
| C                | -2.53776400 | -1.07650800 | -0.35444800 | H                | 2.76641500  | 2.77552800  | 1.94972400  |
| C                | -3.14012700 | 0.77126100  | -1.79457000 | H                | 4.30255900  | 2.43468900  | -2.05892100 |
| C                | -3.12933000 | -1.96663200 | -1.24257400 | H                | 4.10075000  | 3.72494800  | 0.05837800  |
| C                | -3.73898100 | -0.12447000 | -2.67651000 | C                | -0.64087200 | -0.59297400 | -0.95842700 |
| H                | -3.13901300 | 1.83607400  | -2.01021600 | C                | -0.69328300 | 0.76551200  | -0.51139700 |
| C                | -3.73352500 | -1.49177900 | -2.40249600 | H                | -1.28197900 | -0.77896900 | -1.82052800 |
| H                | -3.10217500 | -3.02162000 | -0.98877700 | H                | 0.13350300  | 1.28778800  | -0.06756100 |
|                  |             |             |             | C                | 1.30274700  | 0.57730600  | 2.03761100  |

|   |             |            |             |   |             |             |             |
|---|-------------|------------|-------------|---|-------------|-------------|-------------|
| O | 1.71045900  | 0.70158500 | 3.18418800  | I | -2.35527300 | -0.93101600 | 0.64168900  |
| O | 0.15863500  | 0.15514500 | 1.64088100  | C | -2.84411800 | 3.69066300  | -0.97217100 |
| C | -1.78137700 | 1.62662500 | -1.10184700 | H | -3.83117700 | 3.23081200  | -0.89536200 |
| O | -2.45339100 | 1.30067100 | -2.05024000 | H | -2.77834600 | 4.57733100  | -0.34656700 |
| O | -1.84716700 | 2.79164900 | -0.47435000 | H | -2.64156200 | 3.93292700  | -2.01690400 |

## 4. References:

- (1) M. T. Knowe, M. W. Danneman, S. Sun, M. Pink and J. N. Johnston, *J. Am. Chem. Soc.*, 2018, **140**, 1998.
- (2) (a) Y. Zhao and D. G. Truhlar, *Theor. Chem. Acc.*, 2008, **120**, 215; (b) M. Walker, A. J. Harvey, A. Sen and C. E. Dessent, *J. Phys. Chem. A.*, 2013, **117**, 12590.
- (3) P. J. Hay and W. R. Wadt, *J. Chem. Phys.*, 1985, **82**, 299.
- (4) D. Andrae, U. Häußermann, M. Dolg, H. Stoll and H. Preuß, *Theor. Chim. Acta.*, 1990, **77**, 123.
- (5) A. V. Marenich, C. J. Cramer, and D. G. Truhlar. *J. Phys. Chem. B.*, 2009, **113**, 6378.
- (6) M. J. Frisch, G. W. Trucks, H. B. Schlegel, G. E. Scuseria, M. A. Robb, J. R. Cheeseman, G. Scalmani, V. Barone, G. A. Petersson and H. Nakatsuji, *Gaussian 09*, revision D.01; *Gaussian*, Inc.: Wallingford, CT, 2013.
- (7) C. Y. Legault, *CYLview*, 1.0b; Université de Sherbrooke: Quebec, Canada, 2009; <http://www.cylview.org>

## 5. NMR Spectra

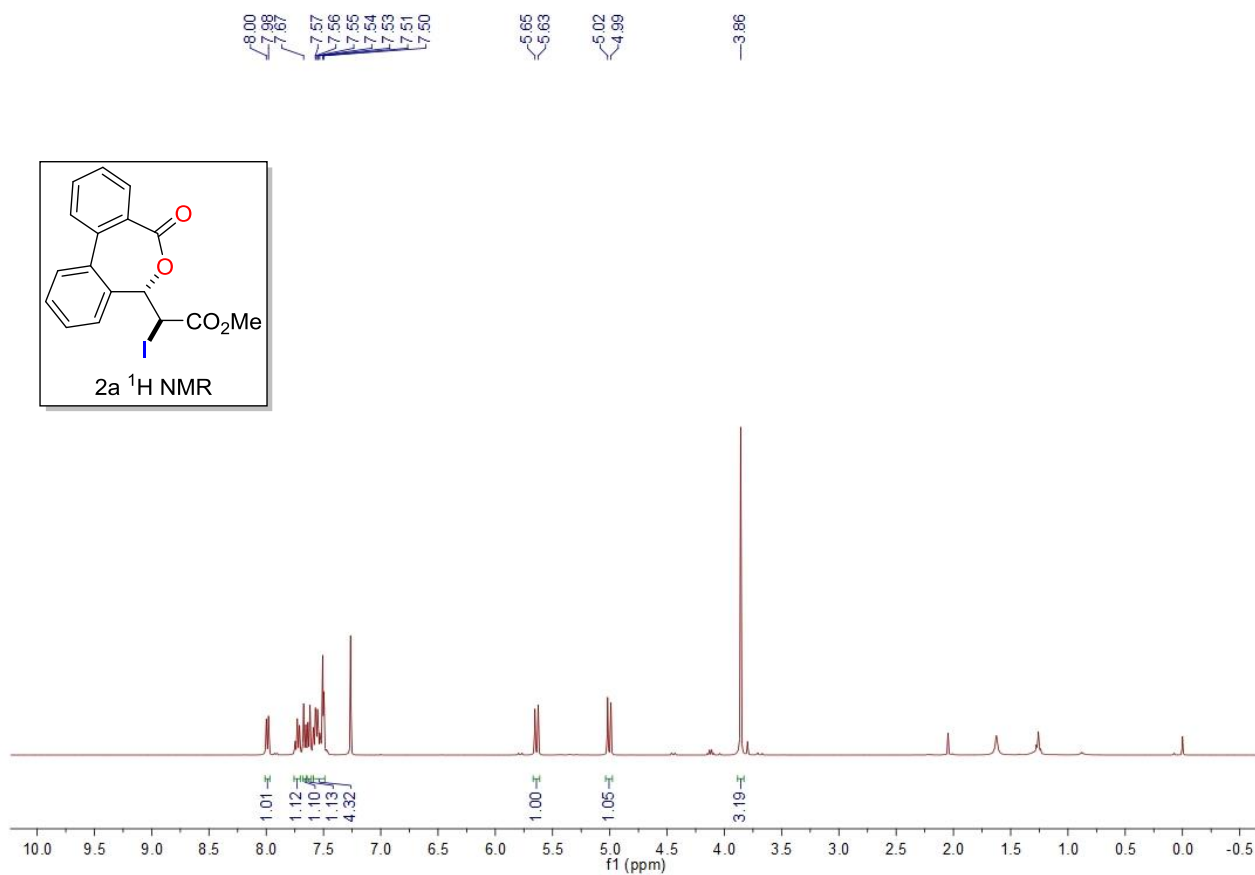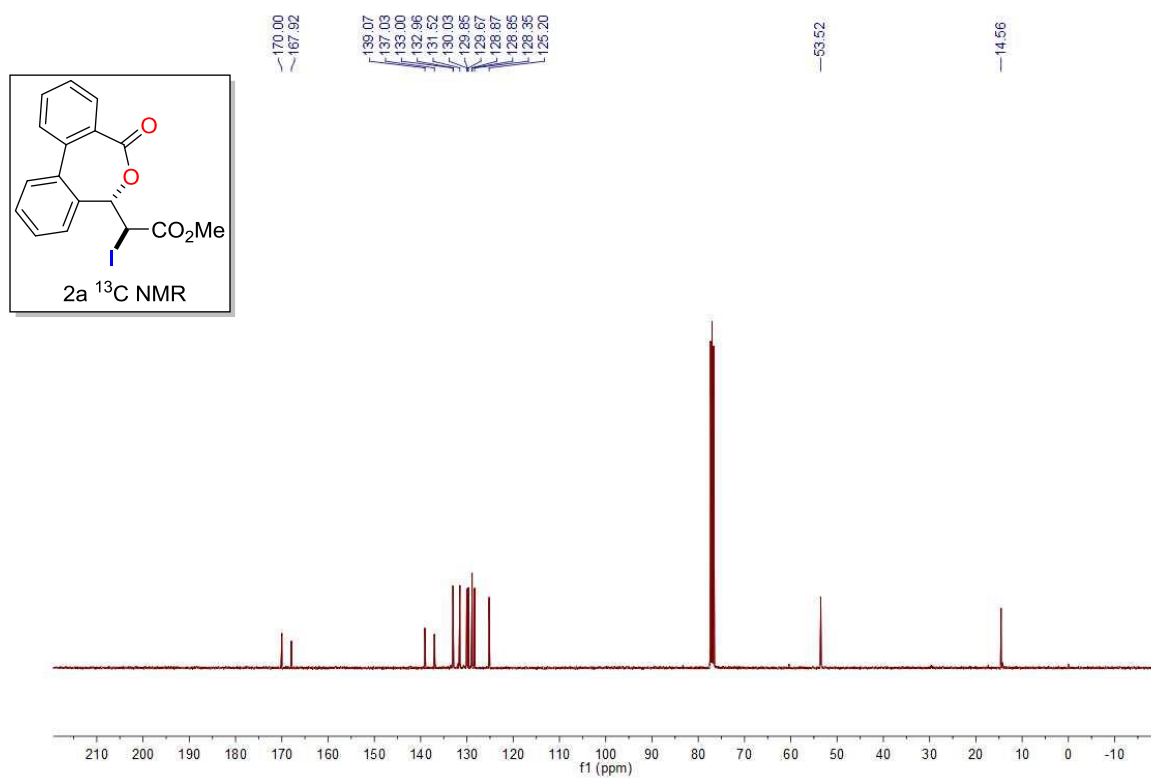

7.99  
7.97  
7.67  
7.56  
7.56  
7.55  
7.54  
7.53  
7.50  
7.49  
5.65  
5.62  
5.00  
4.97  
4.37  
4.36  
4.35  
4.34  
4.33  
4.30  
4.29  
4.28  
4.27  
4.26  
4.25  
4.24  
4.22  
1.34  
1.32  
1.30

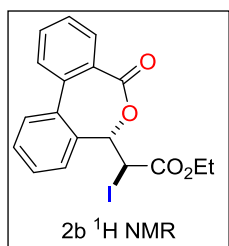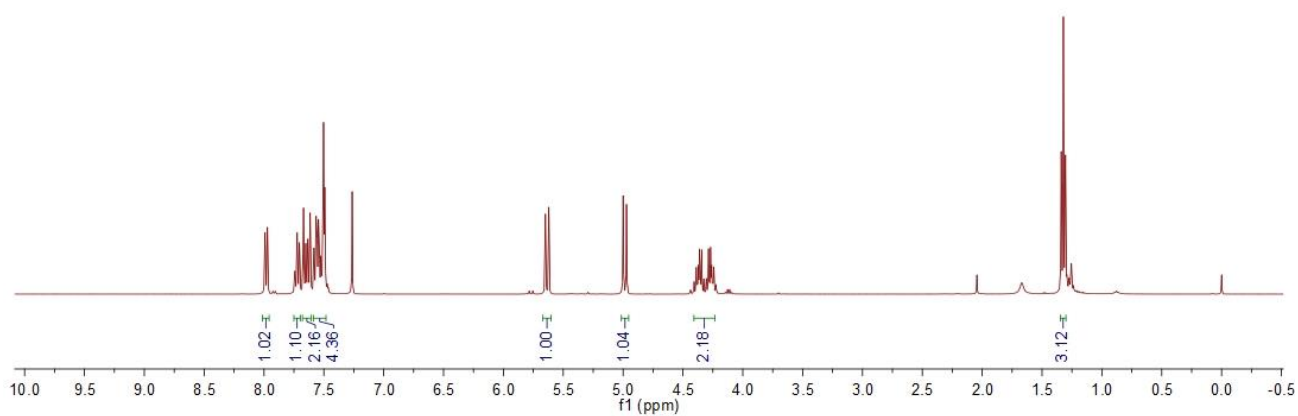

169.44  
168.08  
139.17  
137.19  
133.17  
133.12  
131.56  
130.13  
130.02  
129.77  
129.03  
129.00  
128.49  
125.31  
62.64  
15.33  
13.90

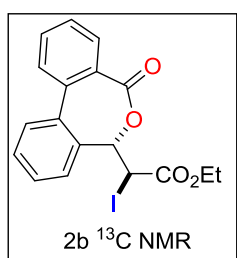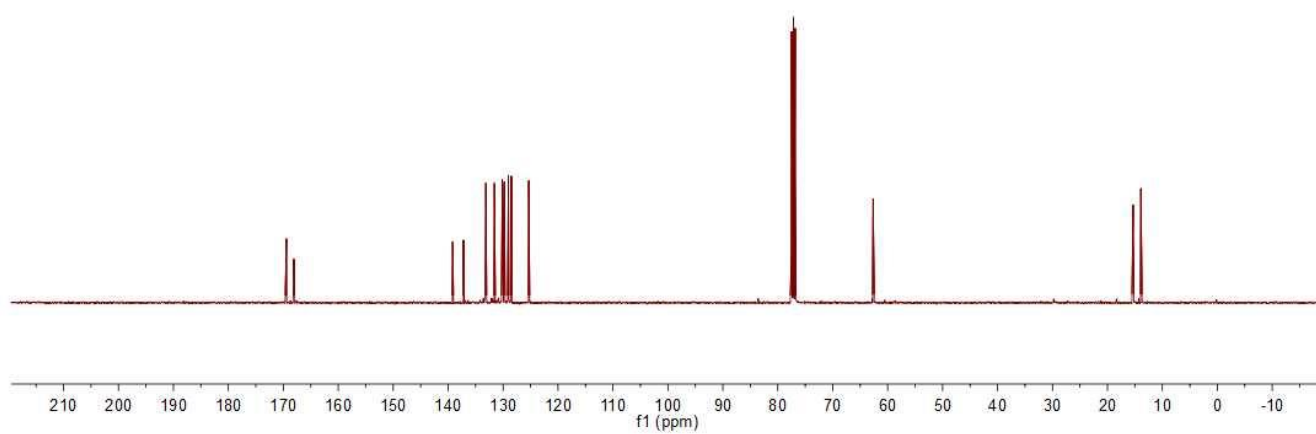

7.98  
7.96  
7.73  
7.72  
7.70  
7.66  
7.65  
7.63  
7.61  
7.57  
7.56  
7.54  
7.53  
7.52  
7.50

5.64  
5.61

5.00  
4.98  
4.34  
4.33  
4.32  
4.32  
4.31  
4.29  
4.22  
4.20  
4.19  
4.18  
4.17

1.69  
1.68  
1.66  
1.45  
1.43  
1.42  
1.40  
0.97  
0.96  
0.94

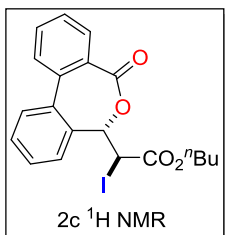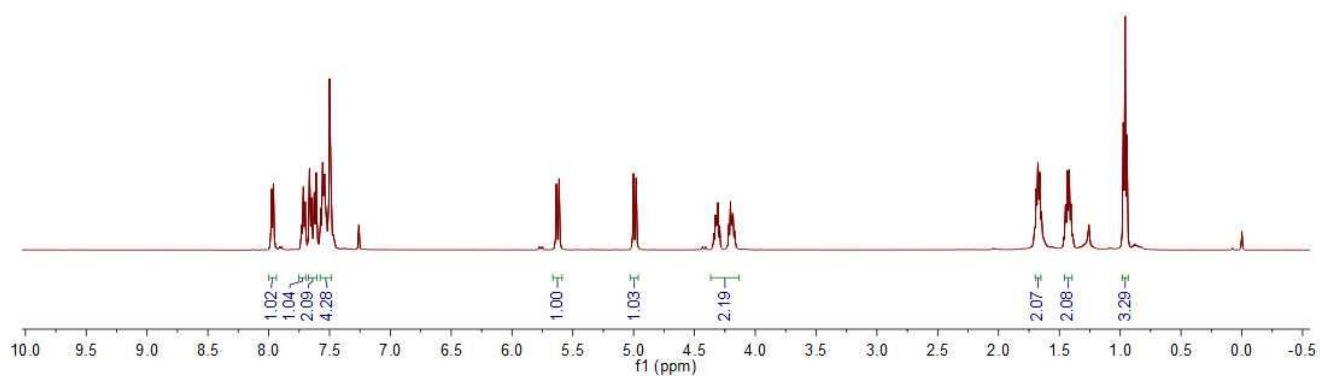

169.51  
168.06

139.18  
137.20  
133.18  
133.12  
131.57  
130.14  
130.05  
129.78  
129.01  
128.96  
128.49  
125.33

66.47

30.41

19.16  
15.38  
13.81

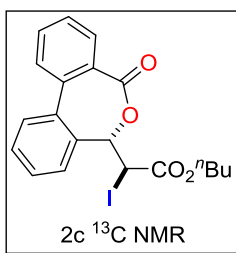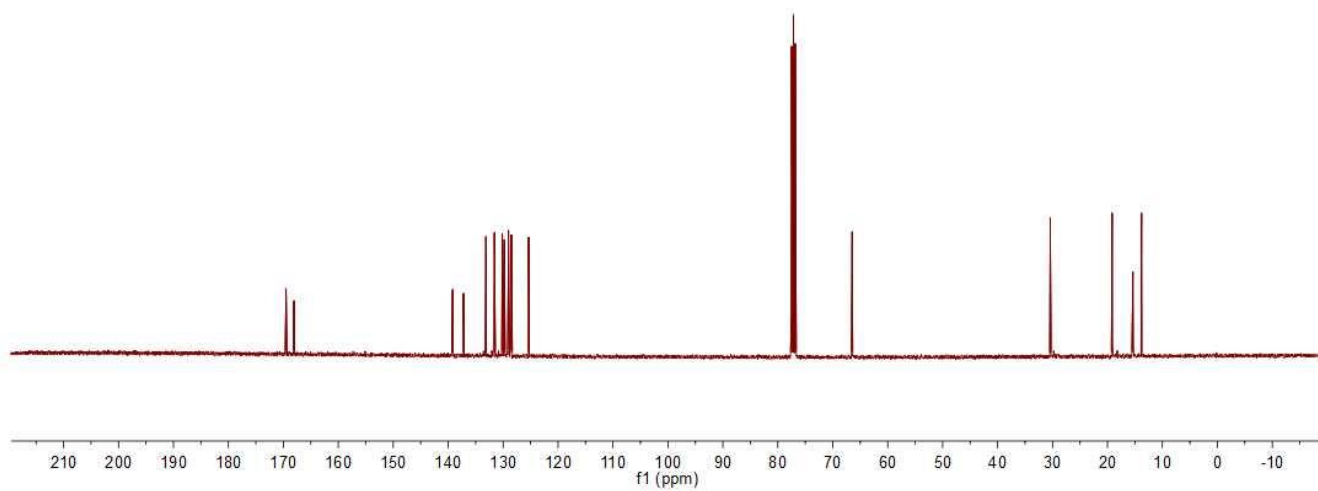

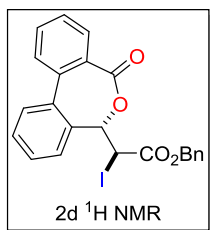

7.90  
 7.89  
 7.63  
 7.57  
 7.54  
 7.53  
 7.50  
 7.48  
 7.40  
 5.65  
 5.62  
 5.37  
 5.19  
 5.16  
 5.06

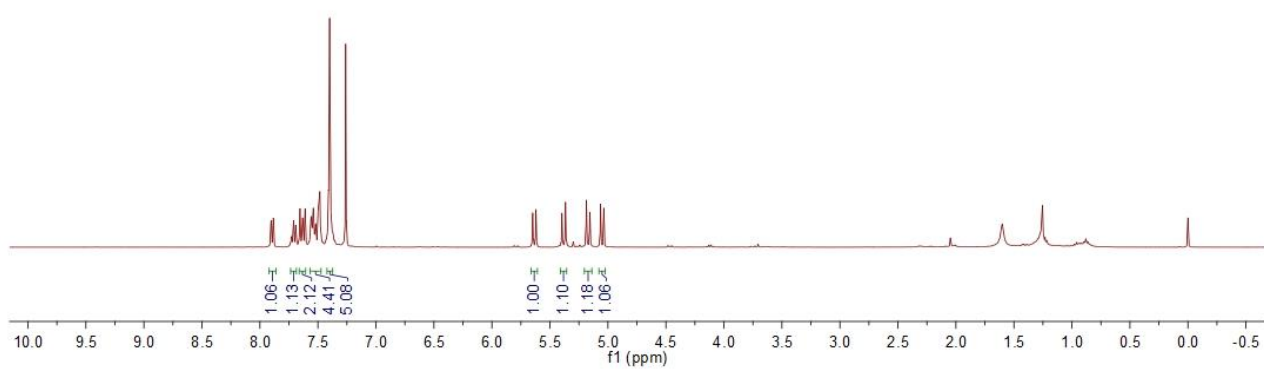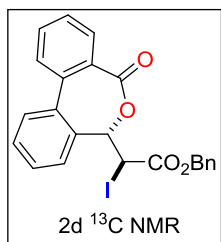

169.25  
 168.03  
 139.21  
 137.16  
 134.83  
 133.12  
 131.62  
 130.18  
 130.02  
 129.81  
 128.99  
 128.96  
 128.81  
 128.75  
 128.64  
 128.53  
 125.31  
 68.34  
 15.22

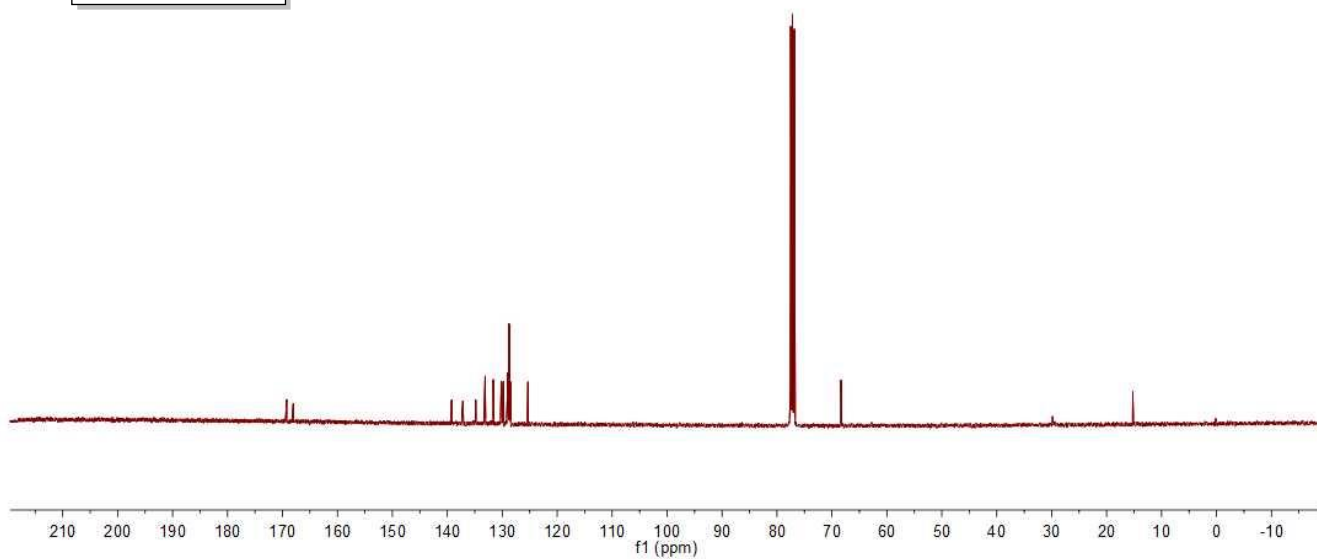

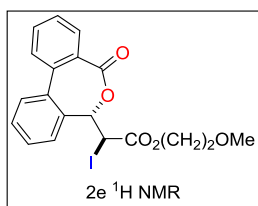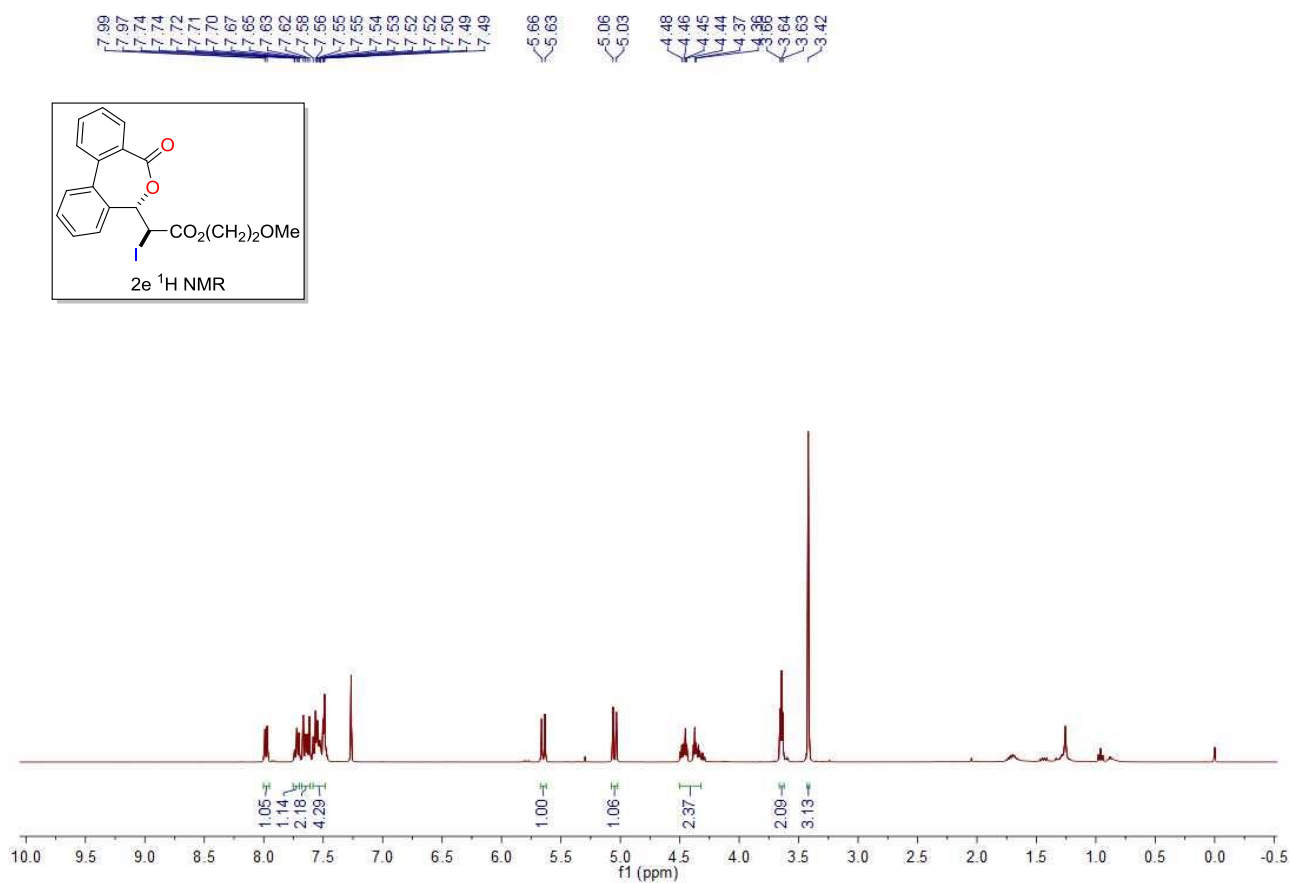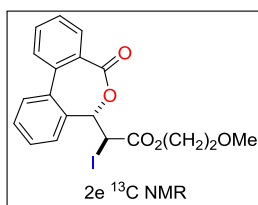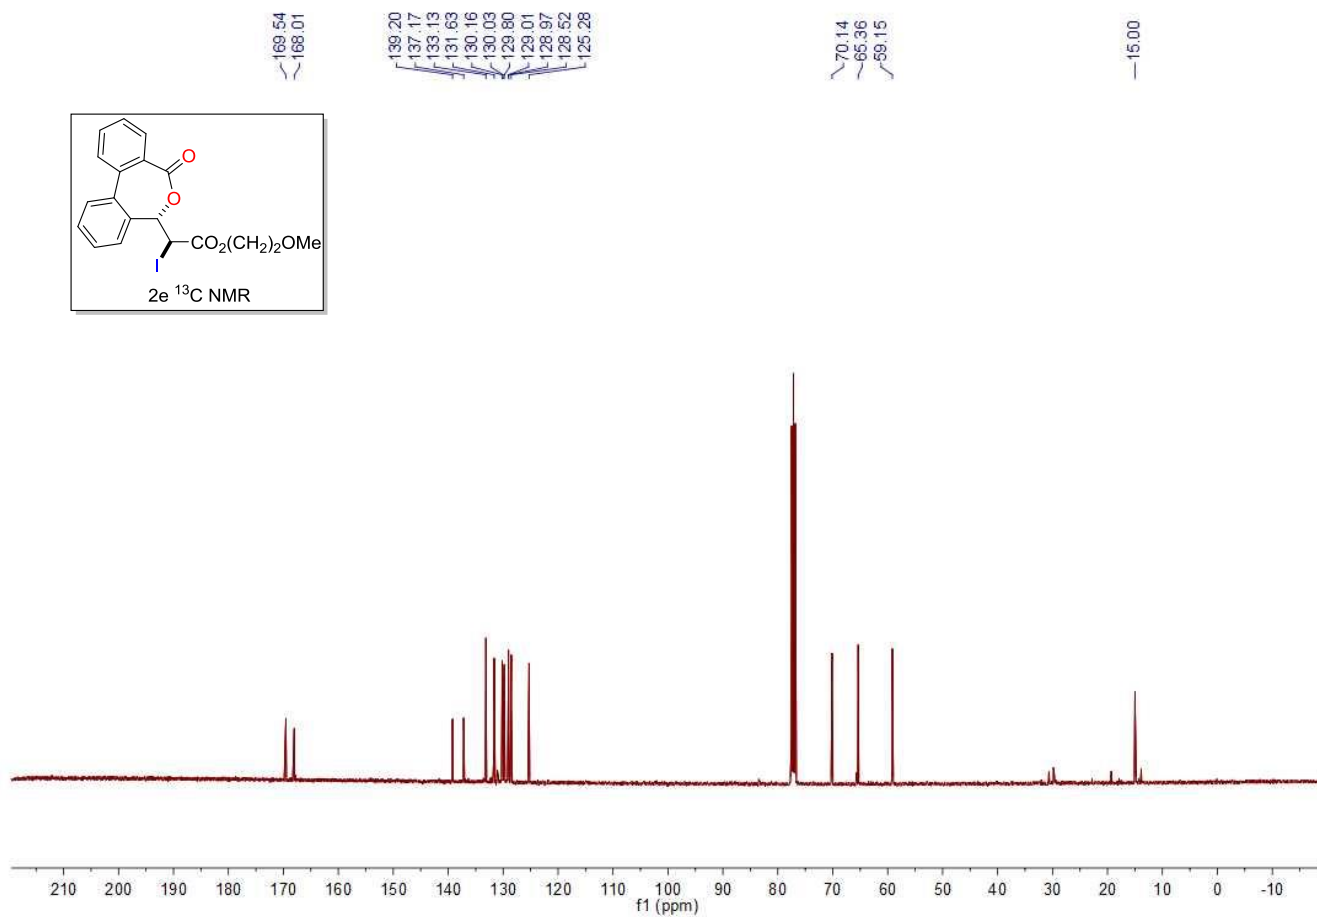

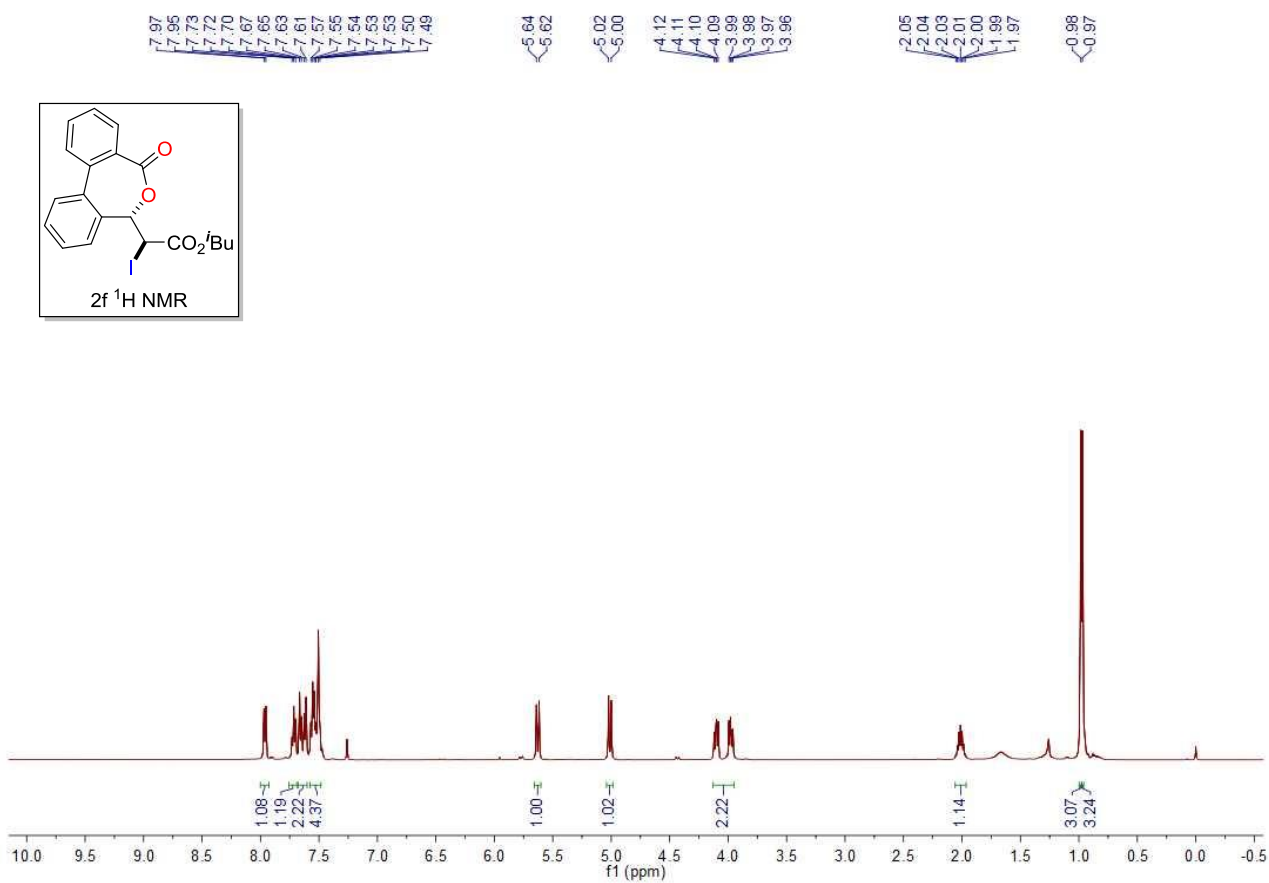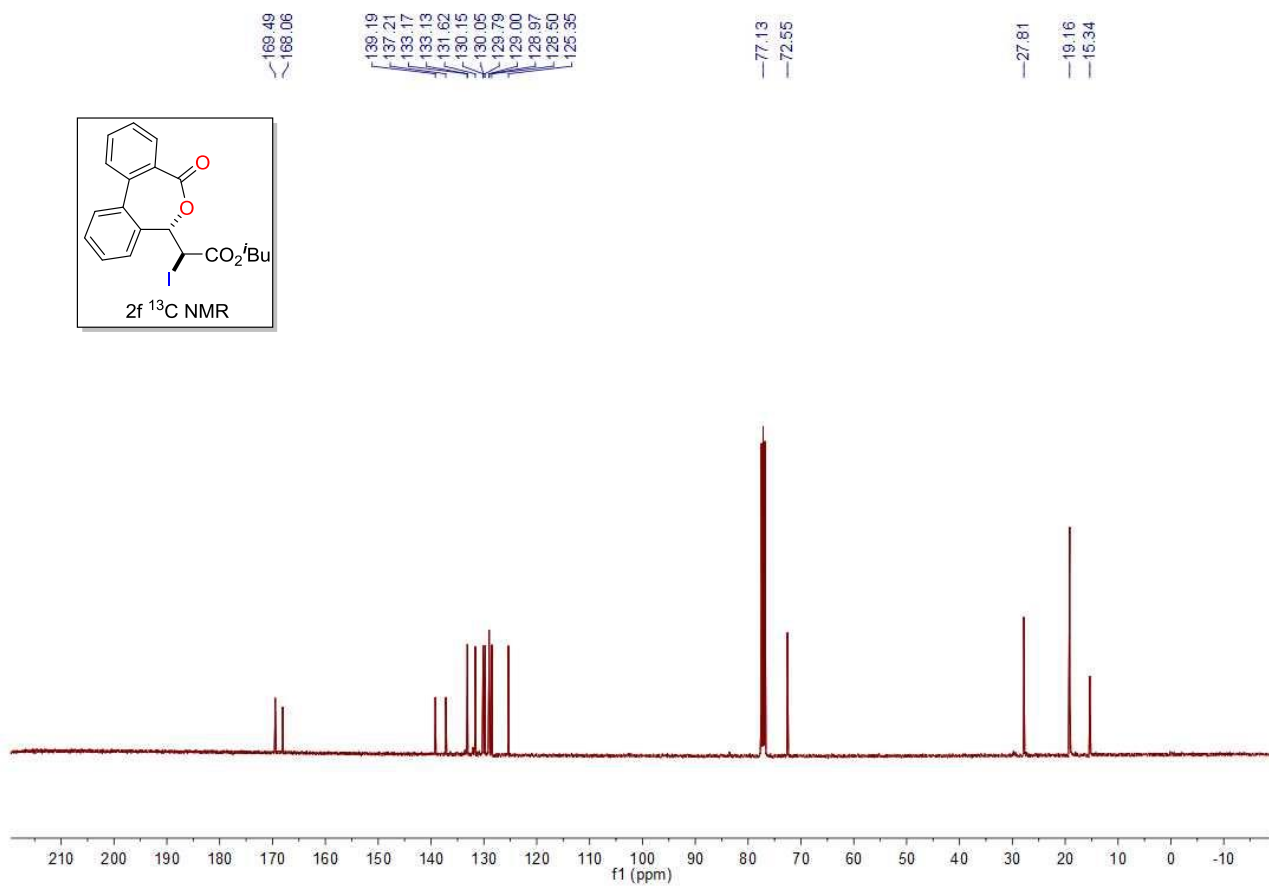



7.98  
7.97  
7.71  
7.71  
7.69  
7.67  
7.67  
7.65  
7.63  
7.57  
7.57  
7.56  
7.55  
7.54  
7.54  
7.52  
7.52  
7.44  
7.42  
7.40  
7.29  
7.27  
7.20  
7.19  
5.75  
5.72  
5.24  
5.21

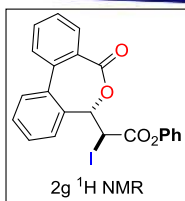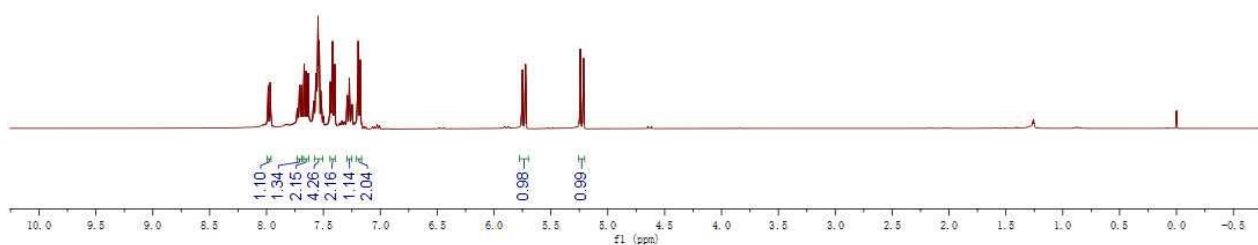

168.08  
167.87

150.40  
139.18  
137.12  
133.14  
132.94  
131.64  
130.21  
128.85  
129.81  
129.65  
129.04  
128.98  
128.53  
126.52  
125.13  
121.07

14.87

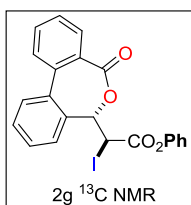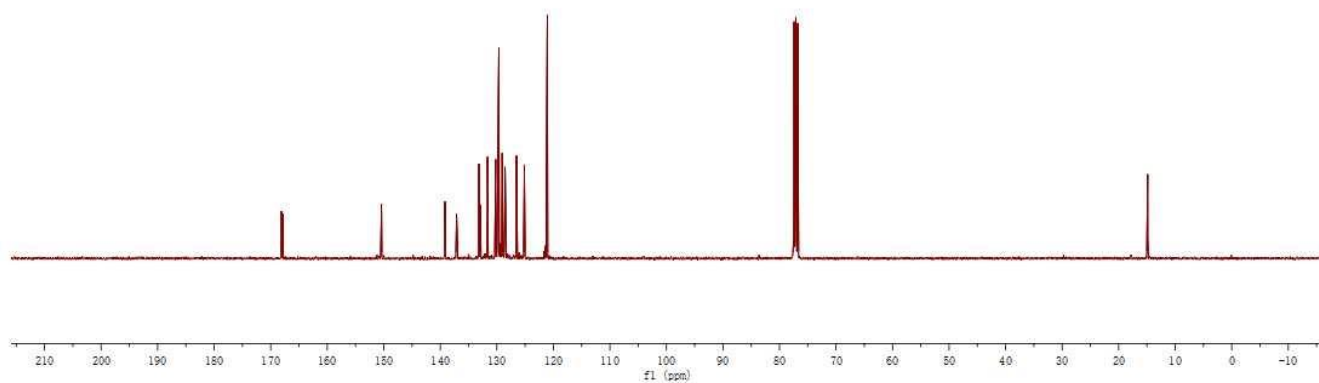

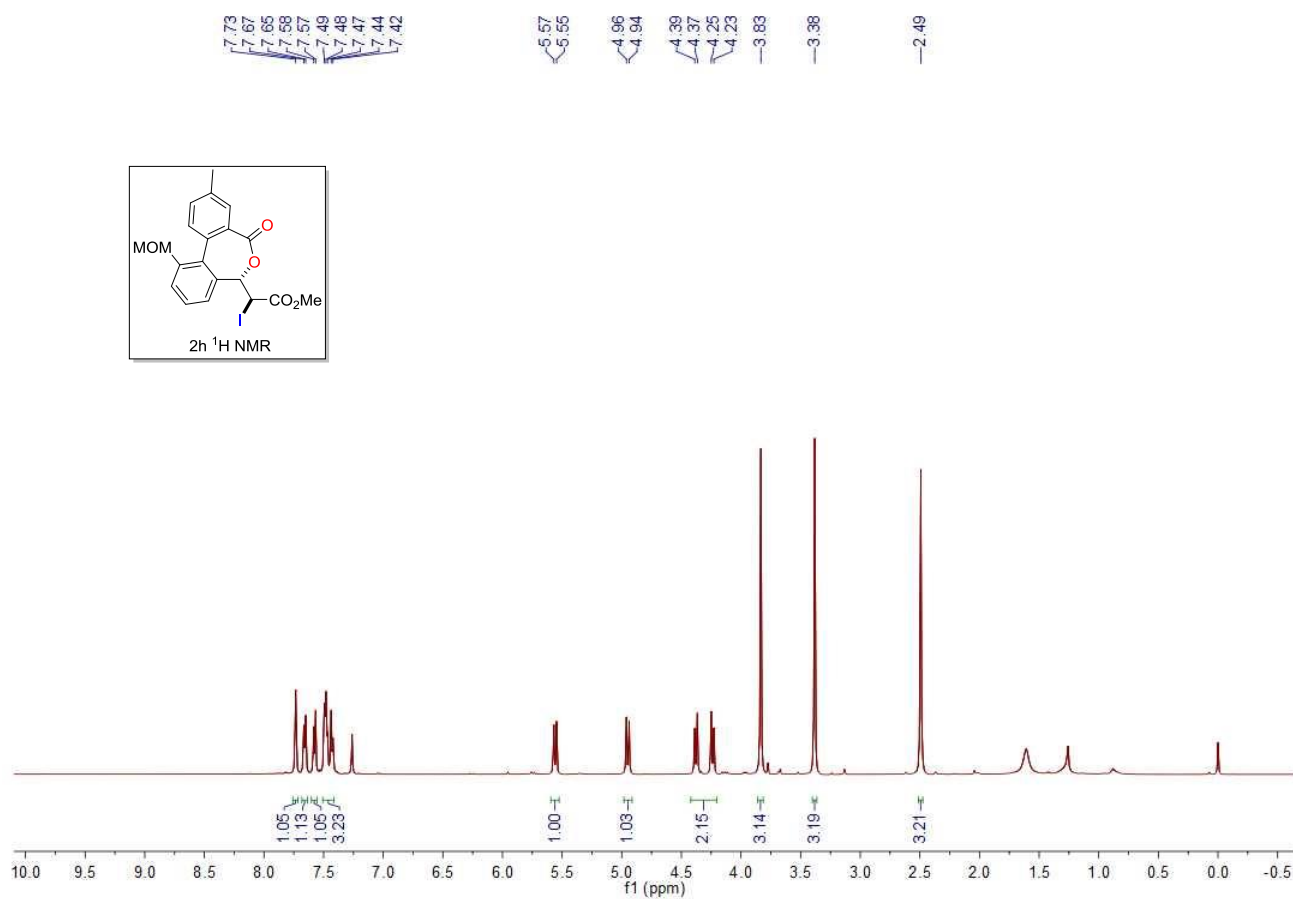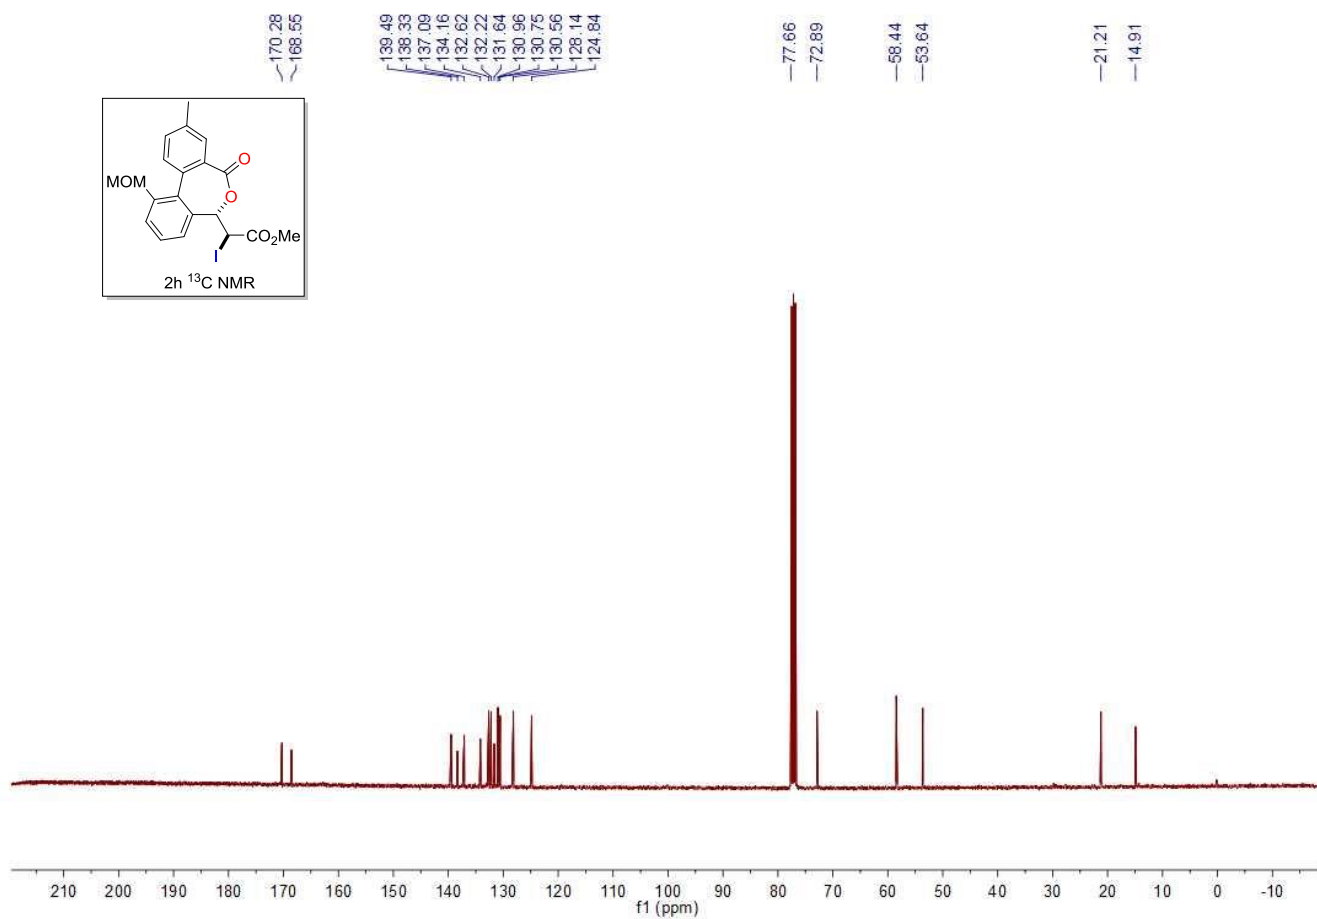

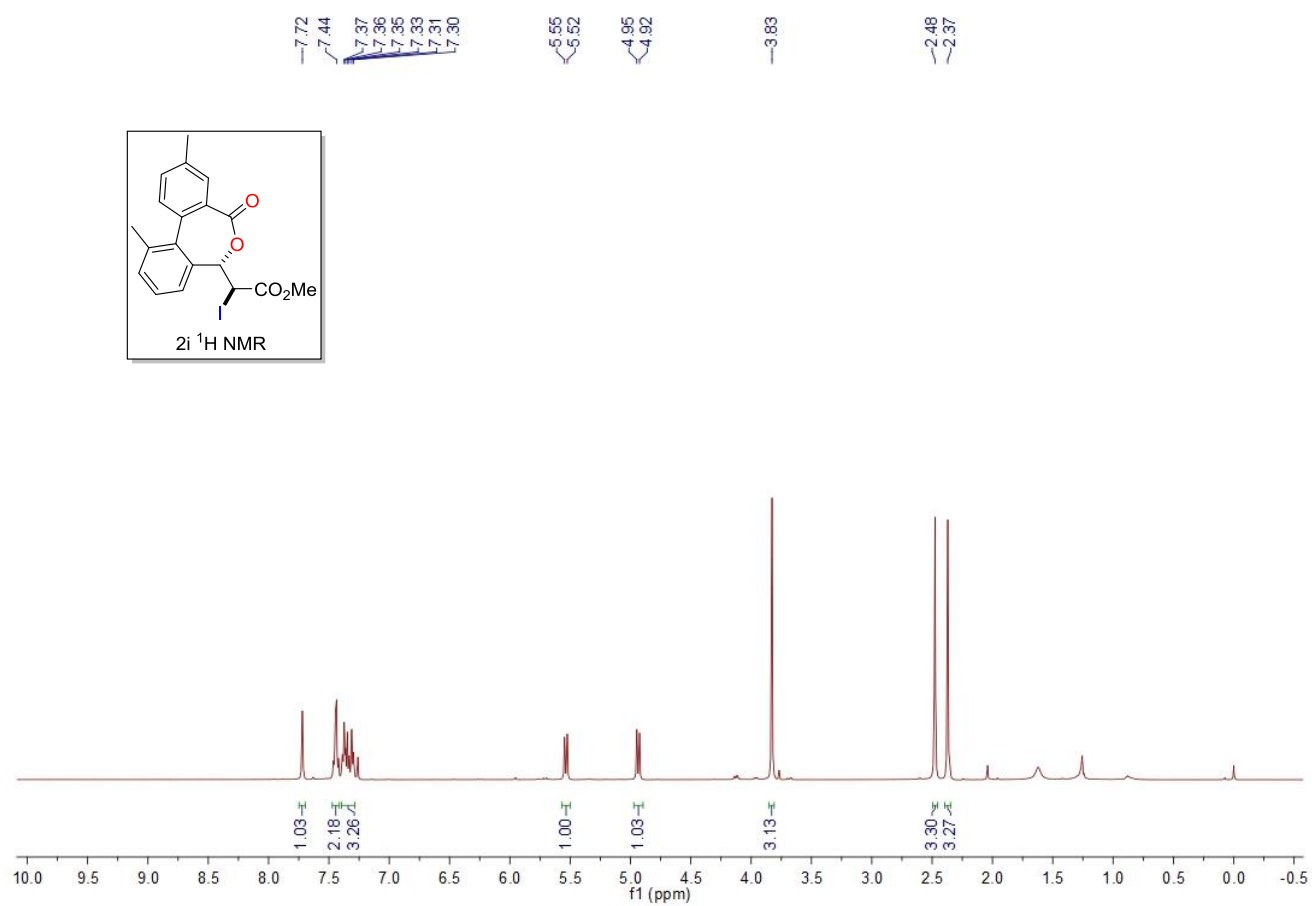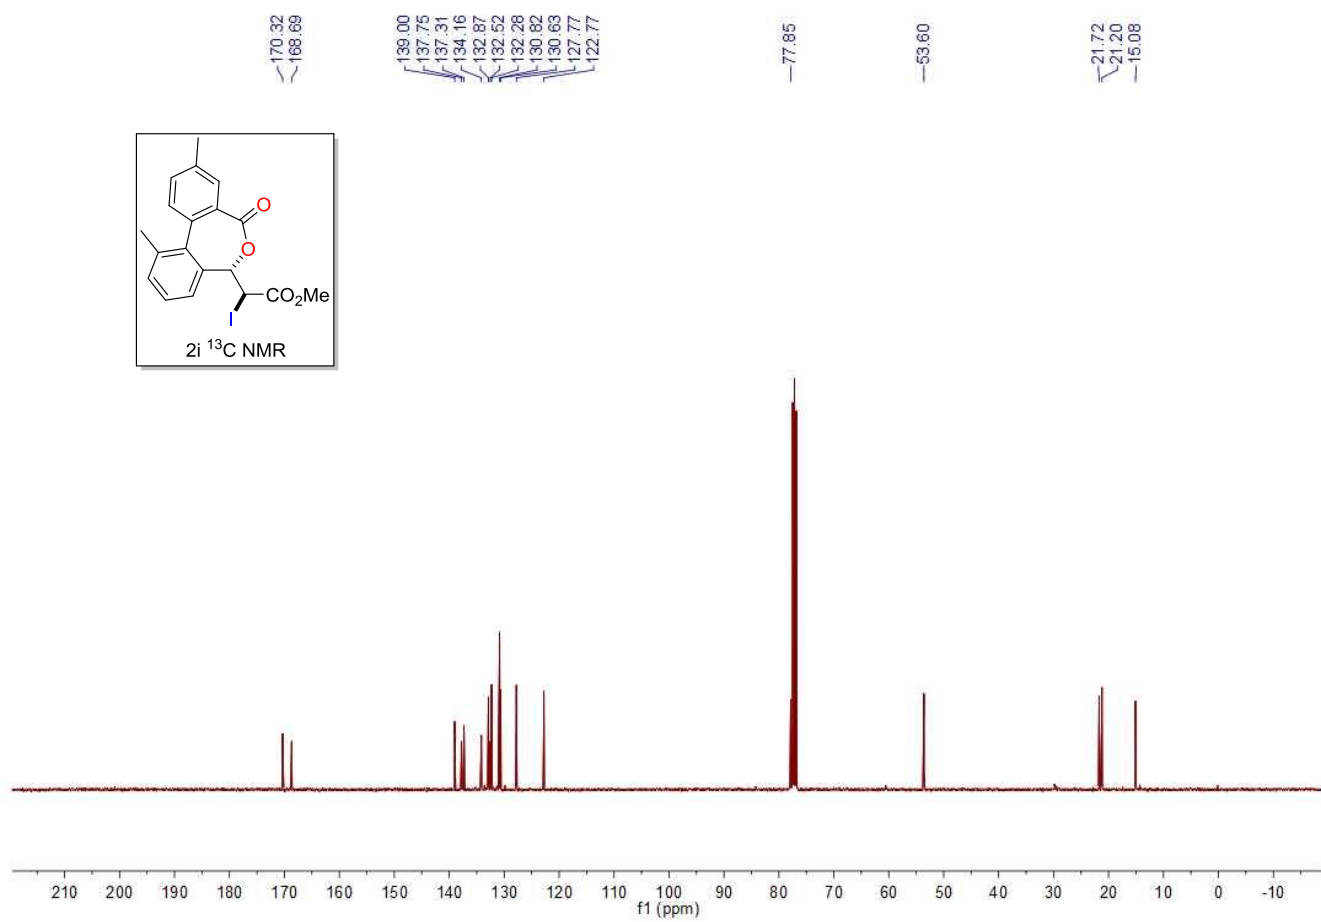

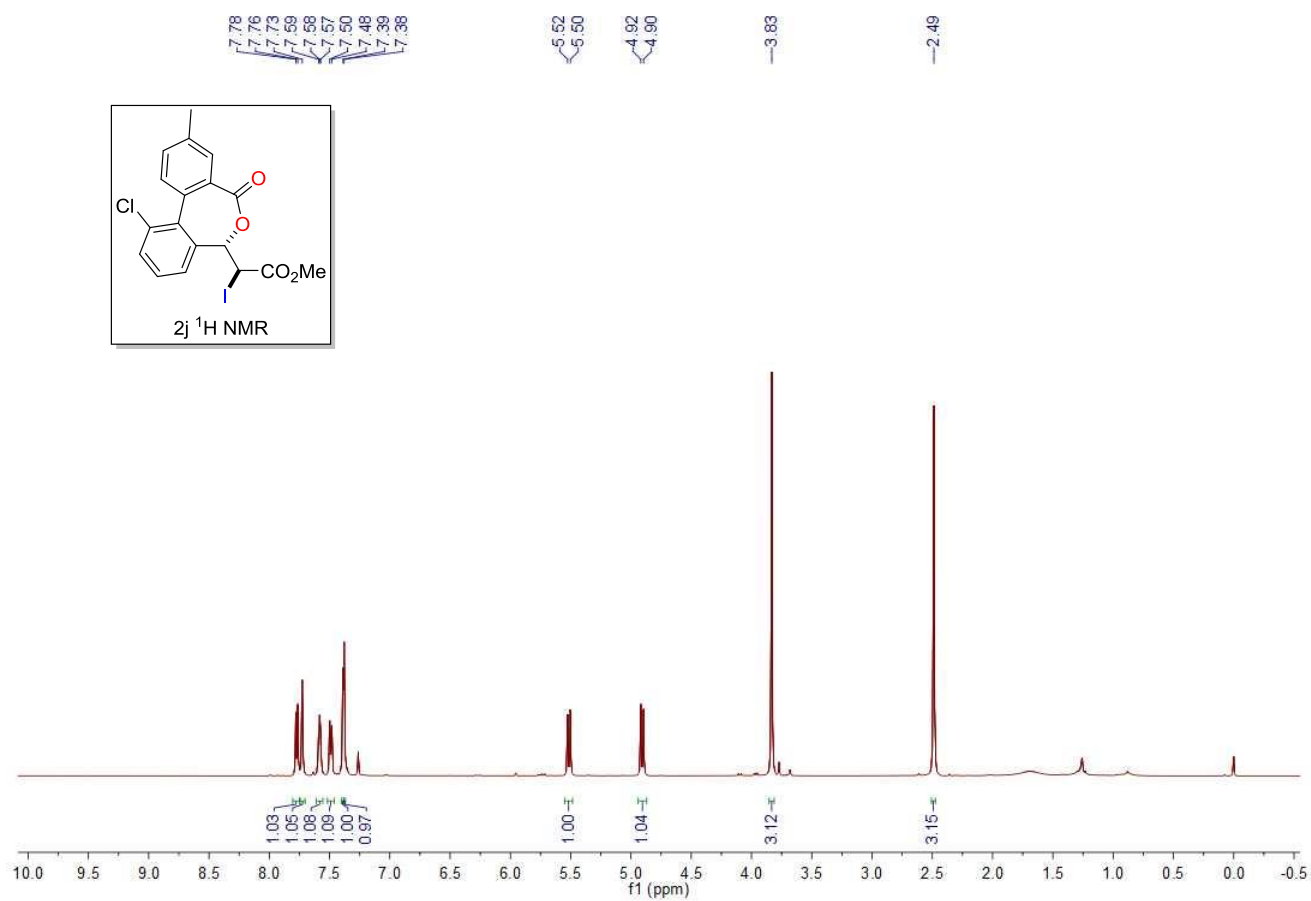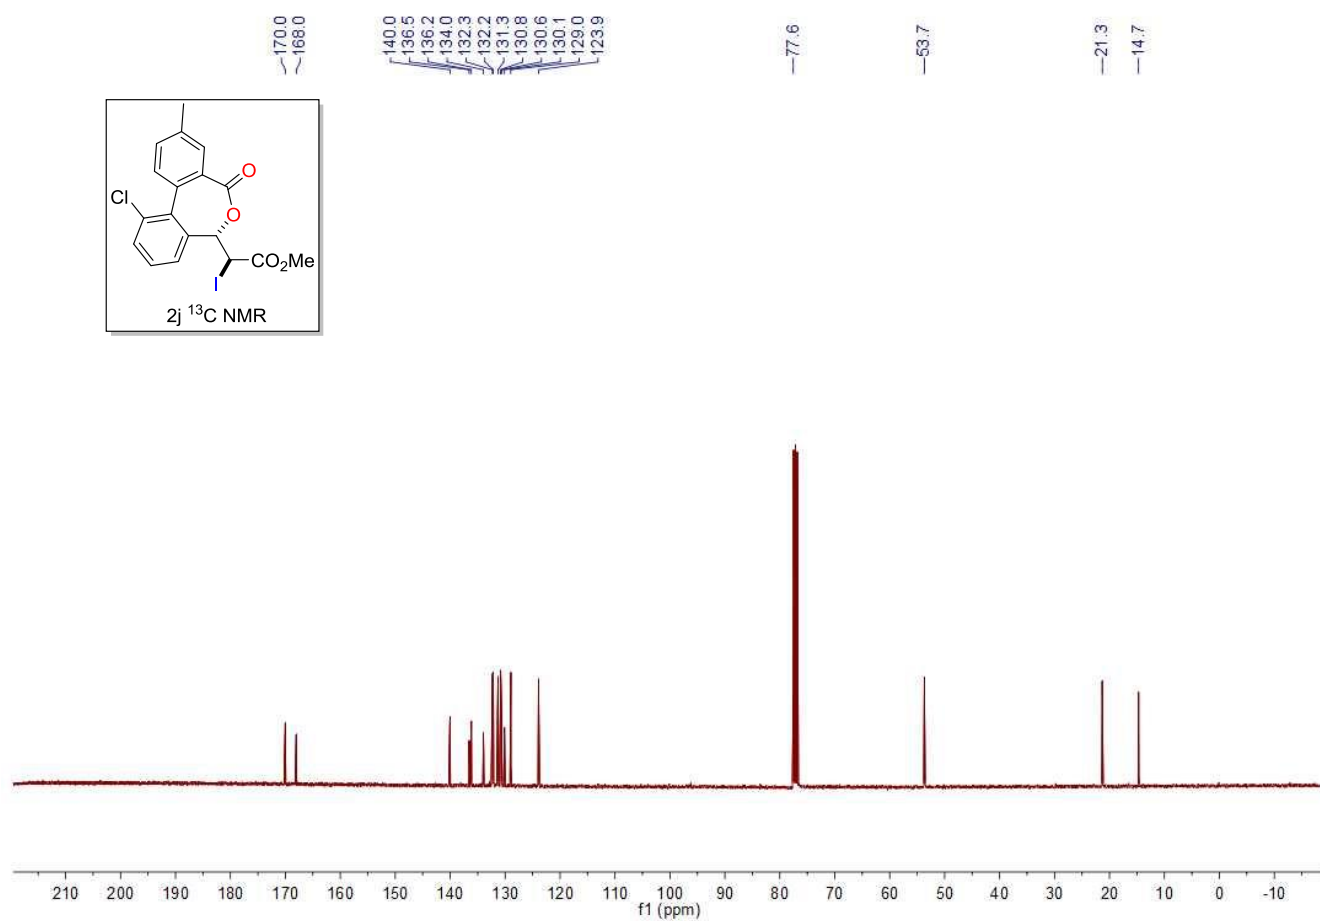

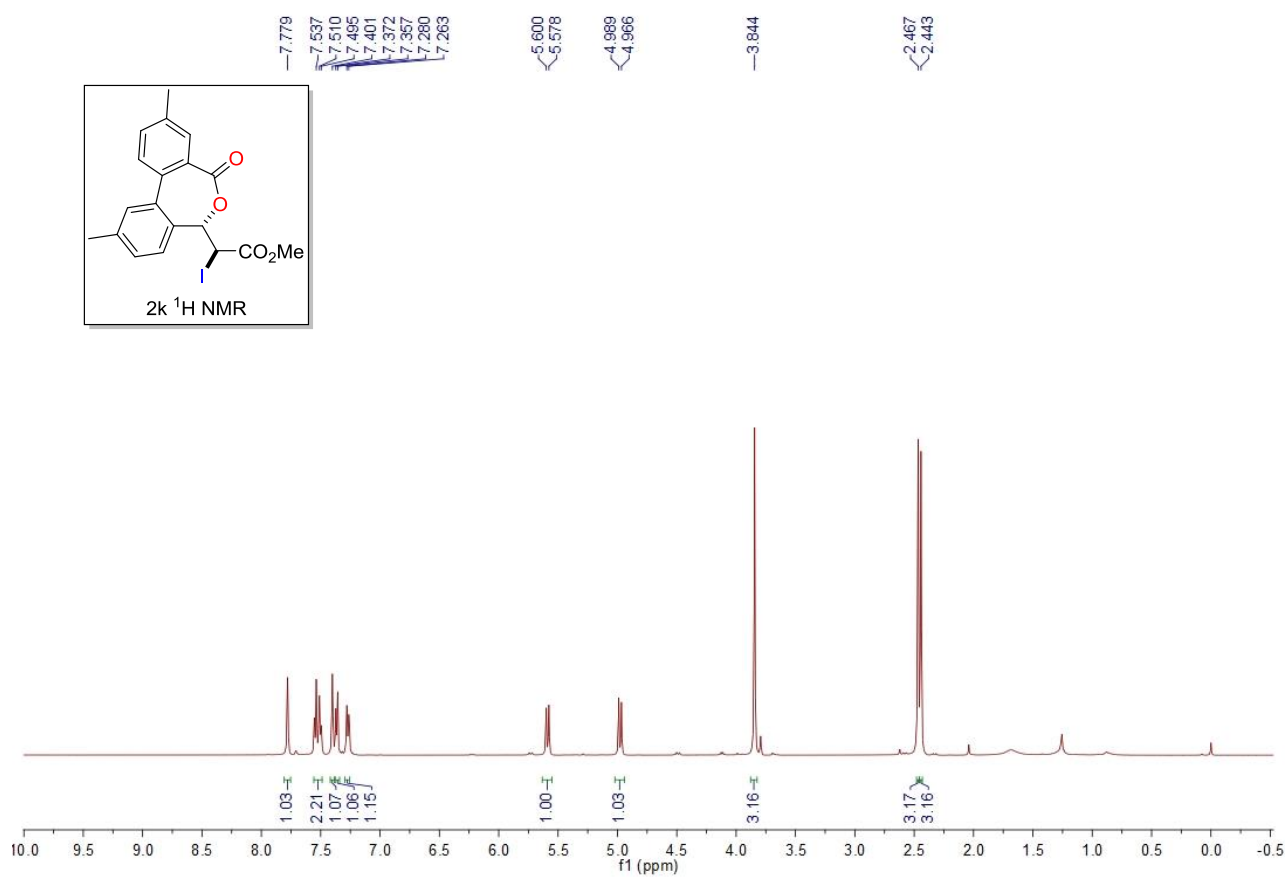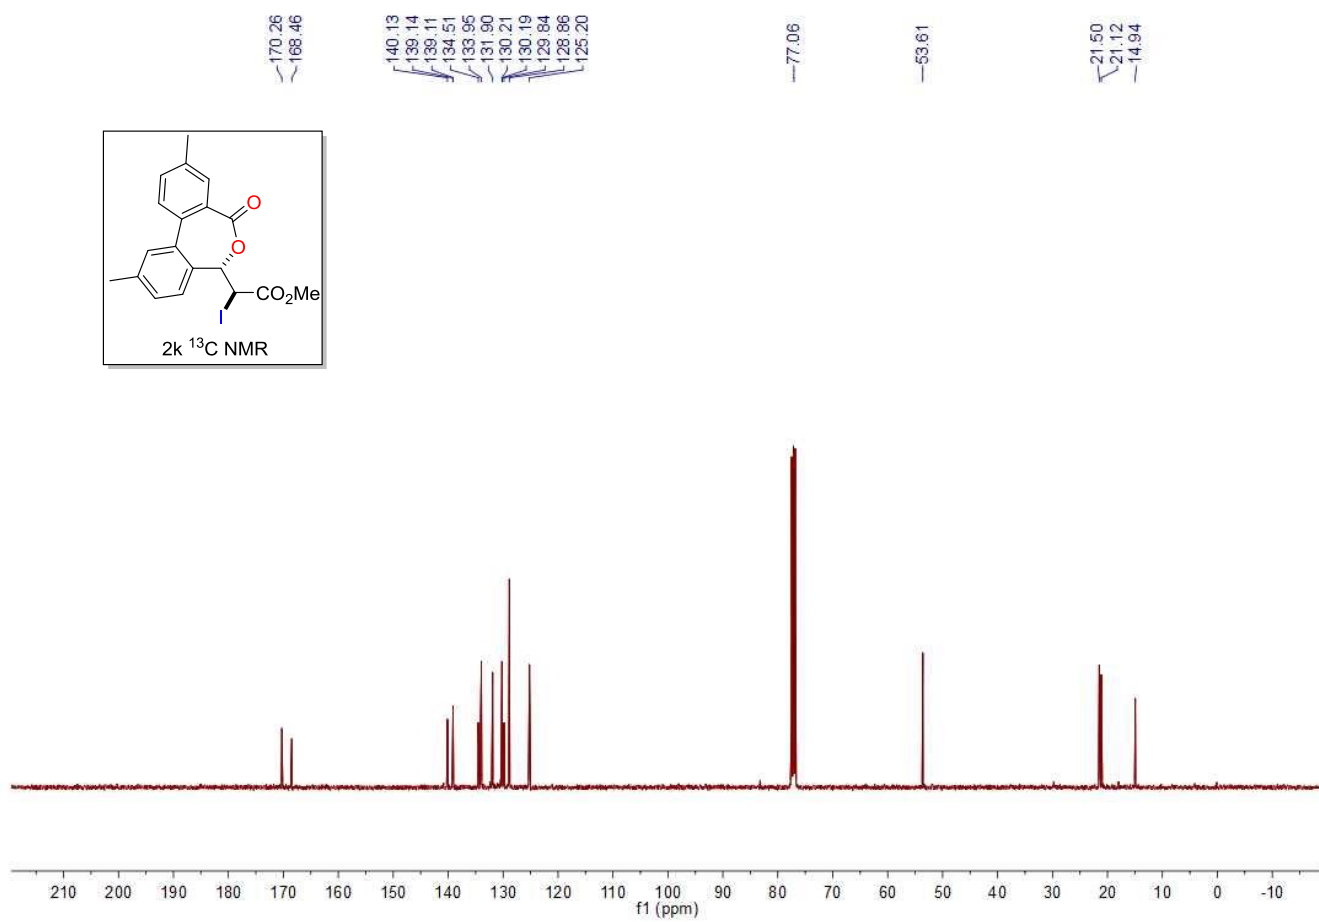

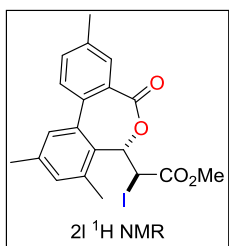

7.68  
7.53  
7.52  
7.50  
7.48  
7.17  
7.11

6.19  
6.16

4.50  
4.48

3.78

2.57  
2.46  
2.40

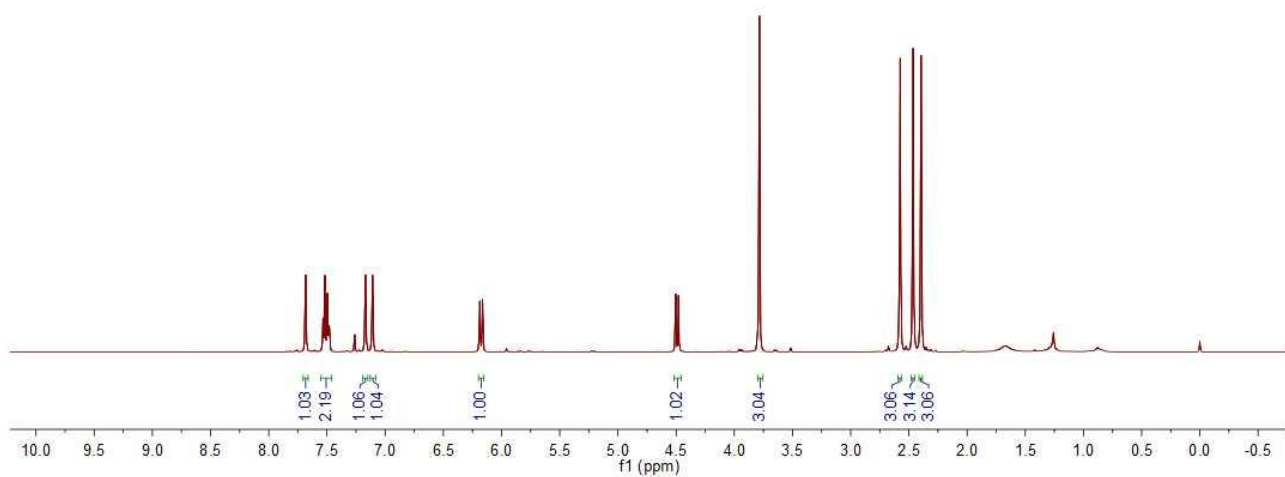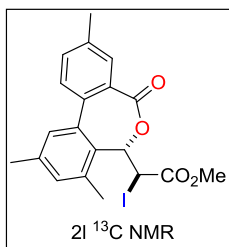

169.63  
168.17

140.16  
139.09  
137.65  
137.46  
134.58  
134.34  
131.90  
131.67  
131.05  
129.95  
129.10  
129.03

76.94

53.62

21.33  
21.13  
20.75  
17.54

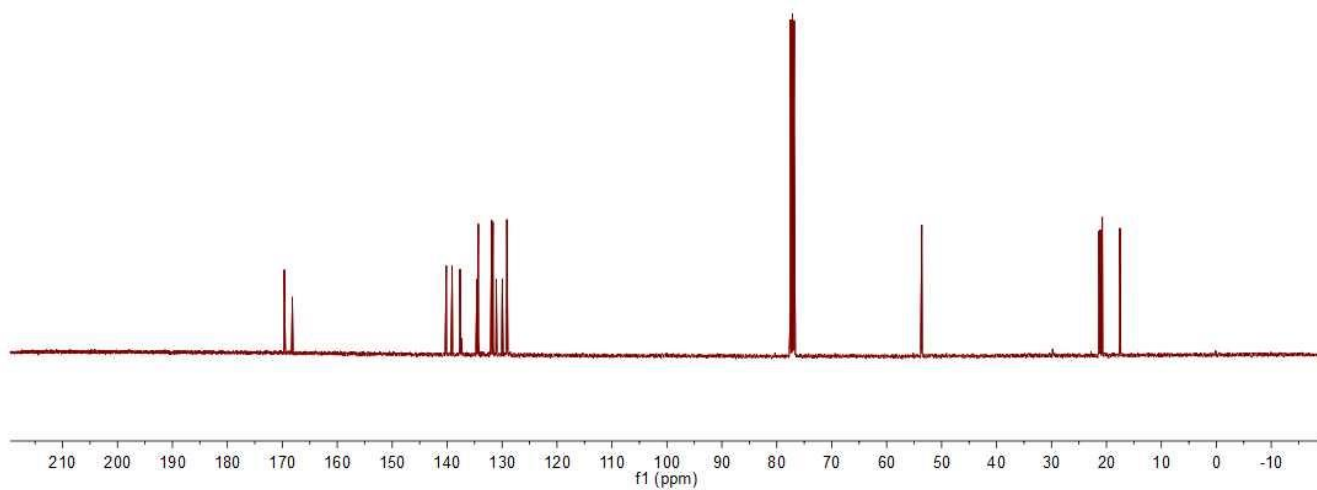

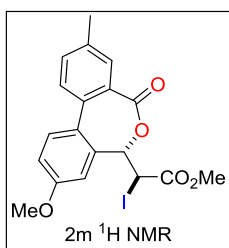

Chemical shift values (ppm) for <sup>1</sup>H NMR:

- 7.77, 7.49, 7.06, 7.04, 7.00
- 5.61, 5.58
- 4.96, 4.94
- 3.90, 3.85
- 2.46

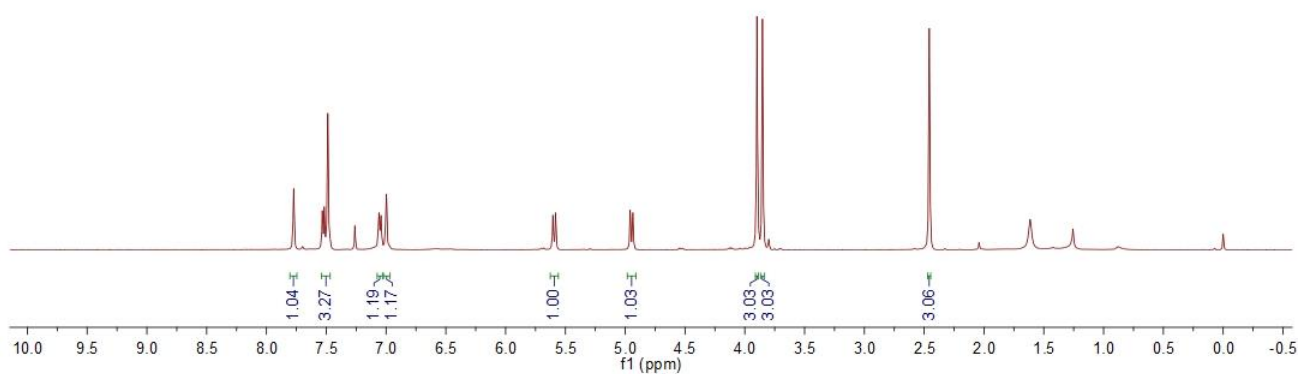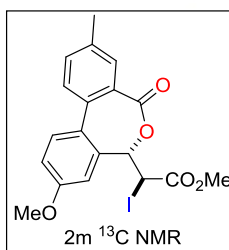

Chemical shift values (ppm) for <sup>13</sup>C NMR:

- 170.17, 168.43, 159.45
- 138.55, 134.39, 134.20, 134.05, 132.01, 131.61, 130.86, 129.31, 128.68, 115.20, 111.49
- 77.06
- 55.73, 55.67
- 21.08, 14.70

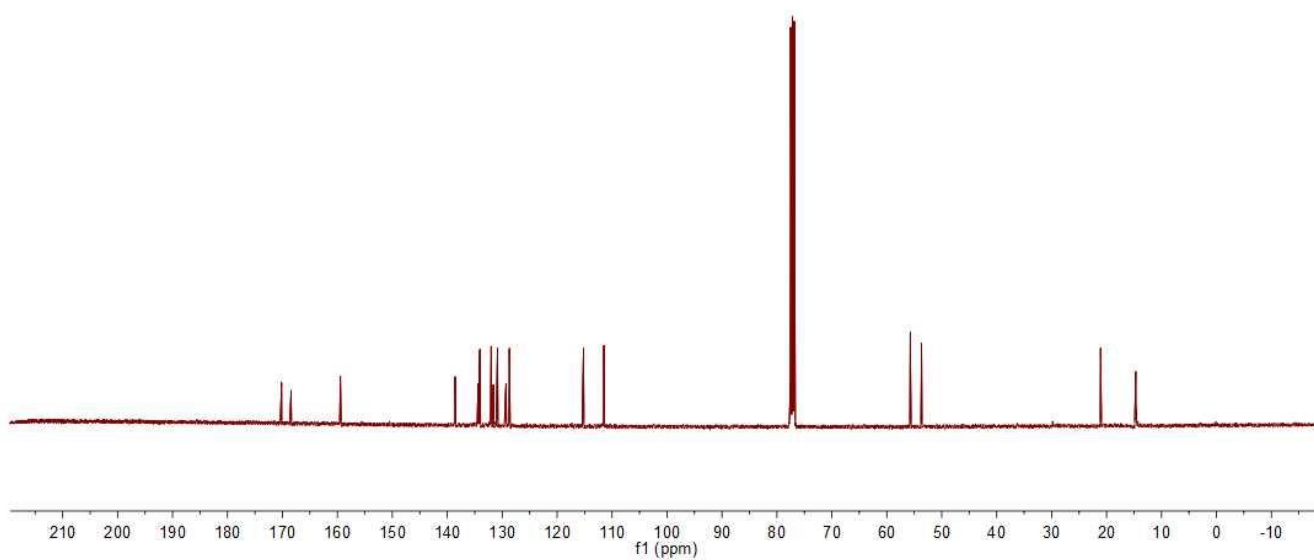

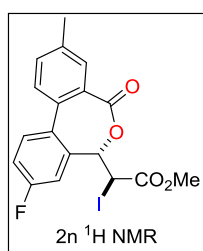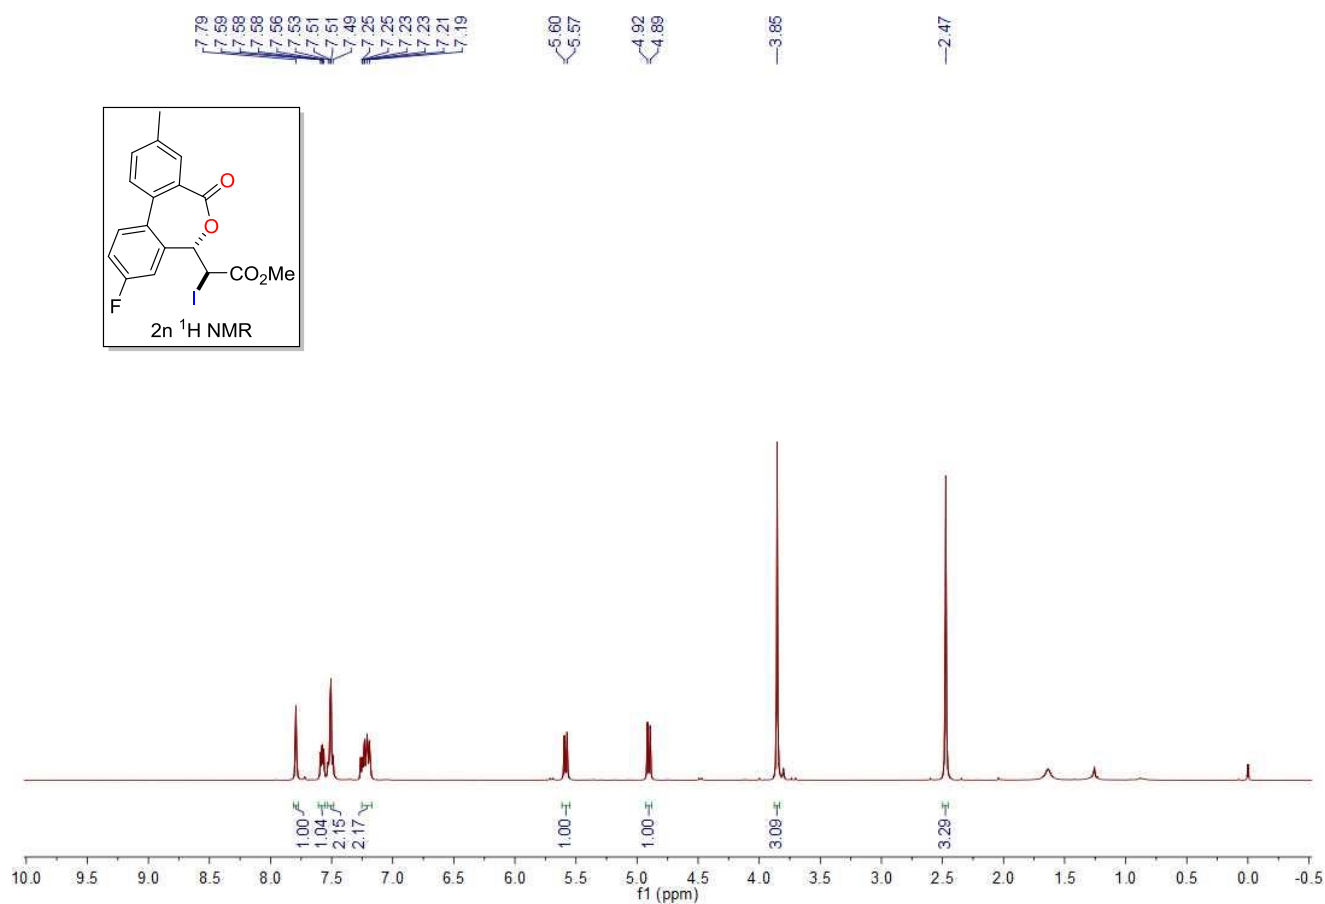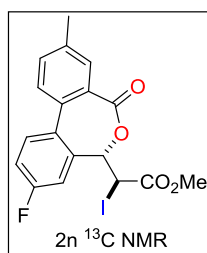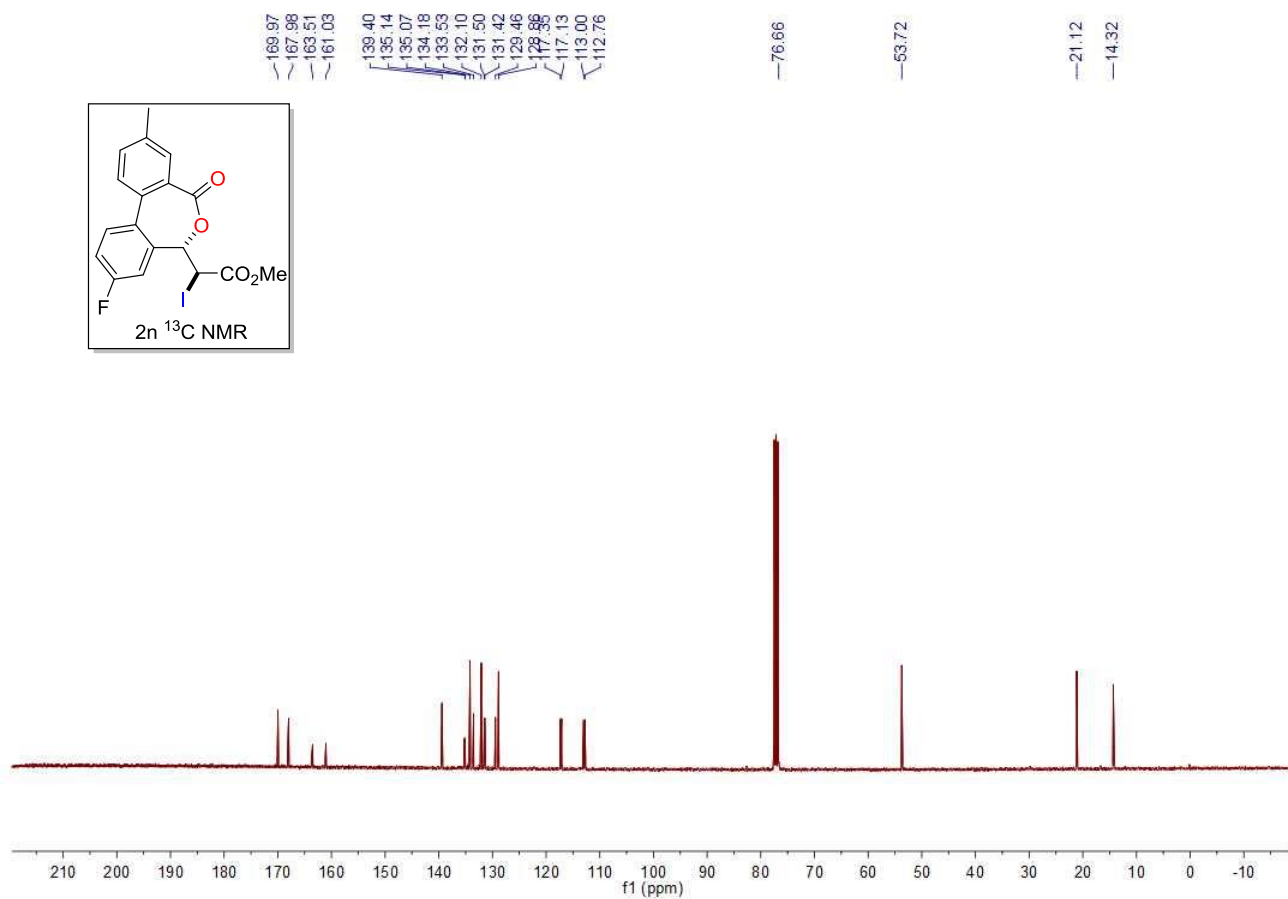



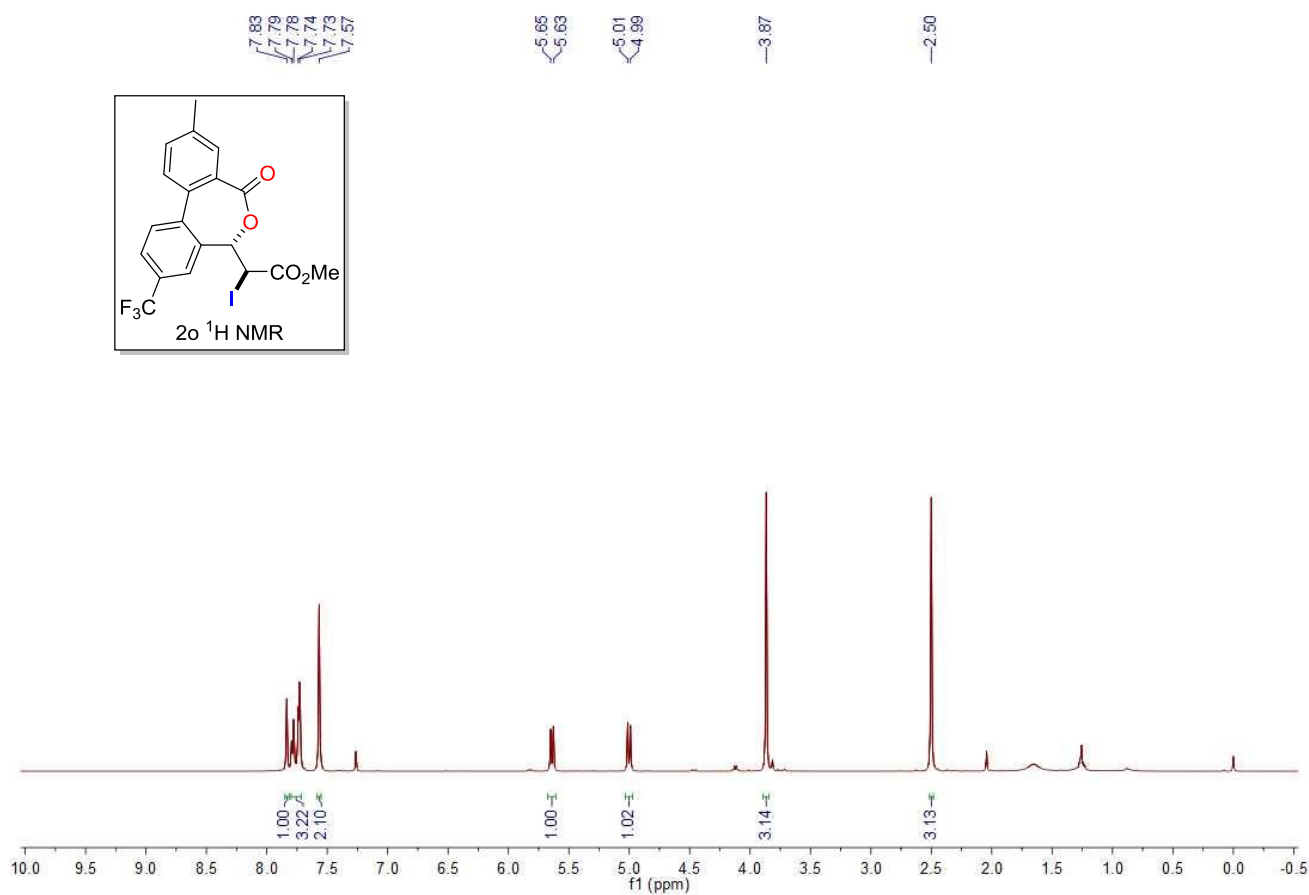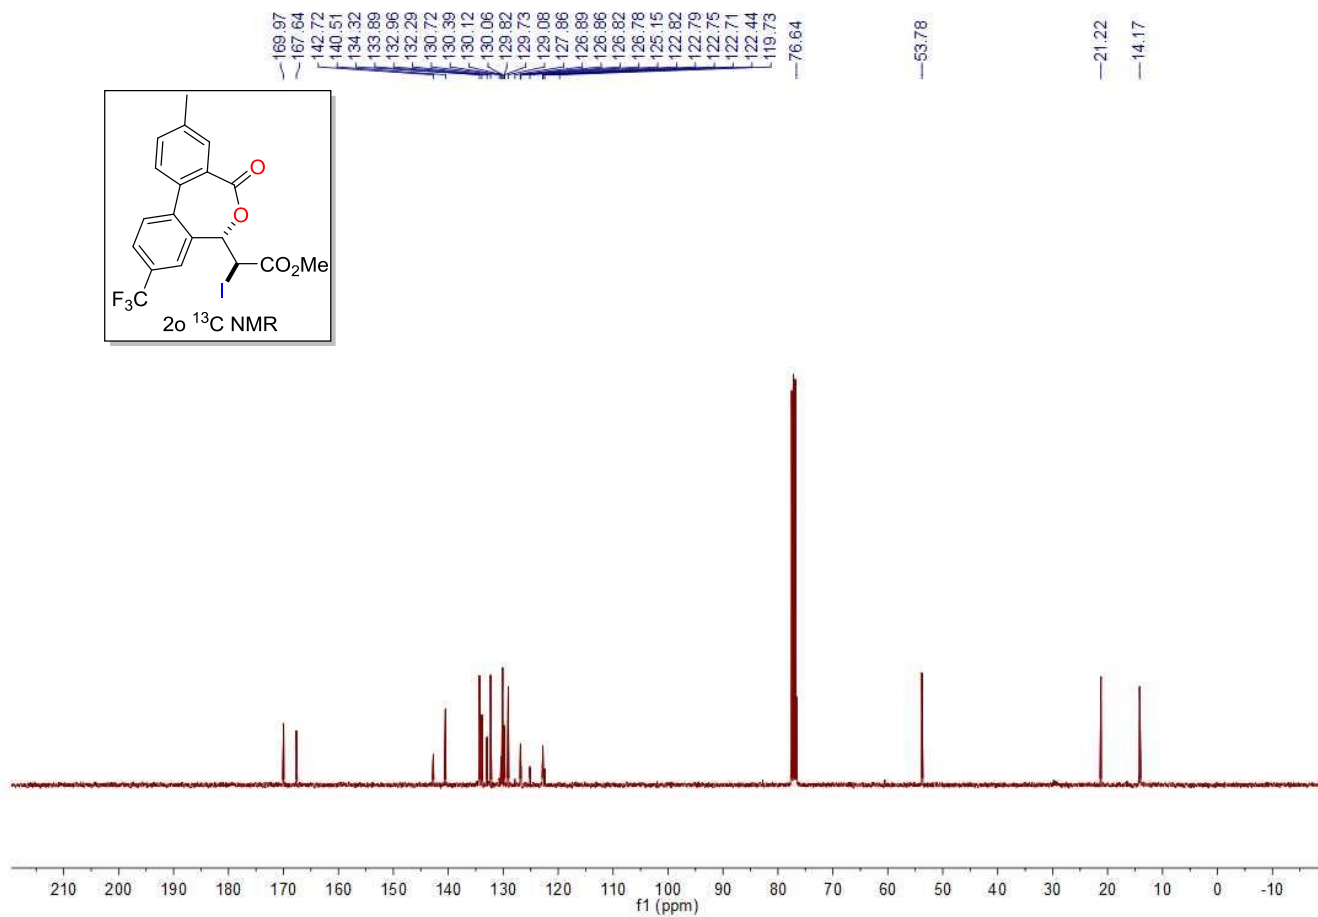

8.02  
8.01  
7.99  
7.97  
7.94  
7.92  
7.80  
7.79  
7.76  
7.75  
7.73  
7.65  
7.64  
7.62  
7.60  
7.59  
7.57  
7.56  
7.54  
7.51  
7.50  
7.48  
5.72  
5.70  
5.07  
5.04  
3.85

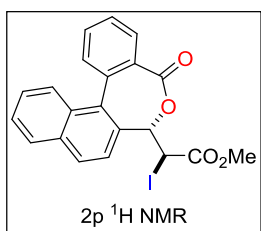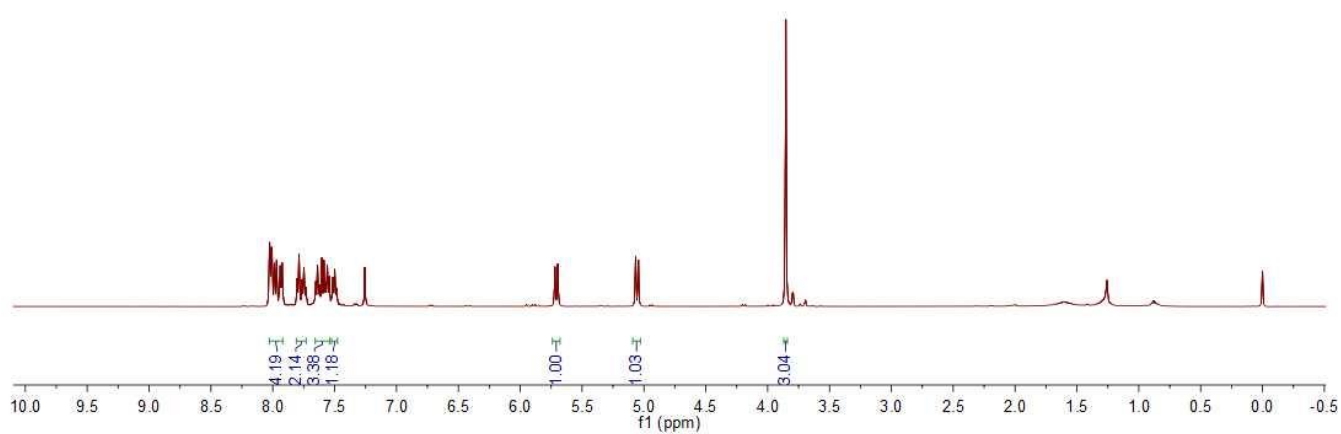

170.18  
168.28  
136.14  
134.54  
134.51  
131.82  
131.74  
131.66  
131.46  
131.30  
130.78  
129.22  
129.18  
128.75  
127.44  
127.10  
126.34  
121.89  
78.03  
53.69  
15.42

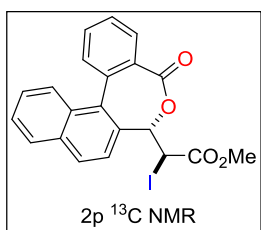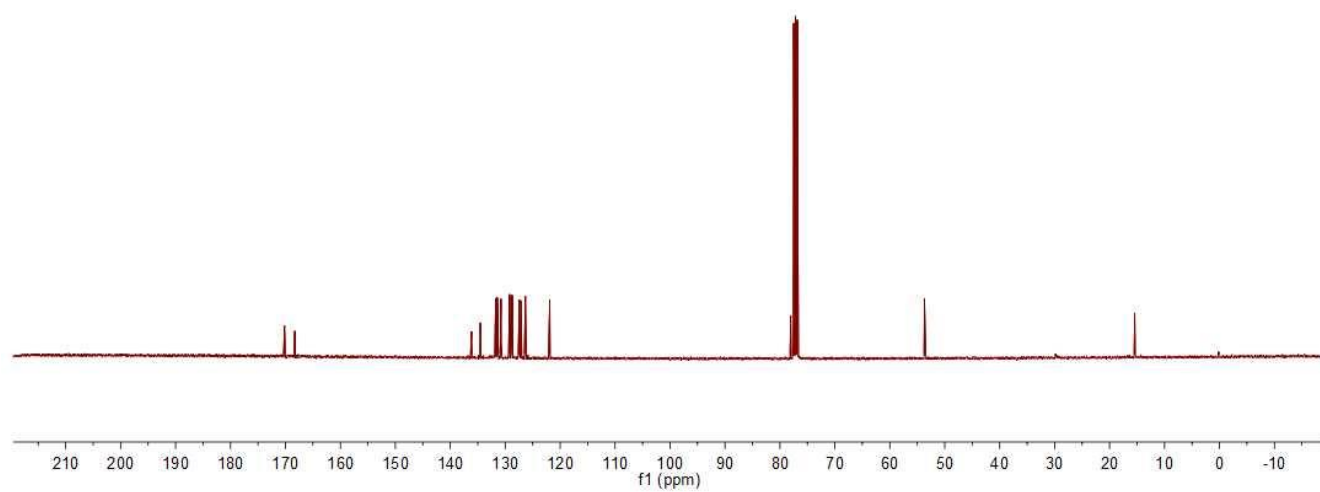

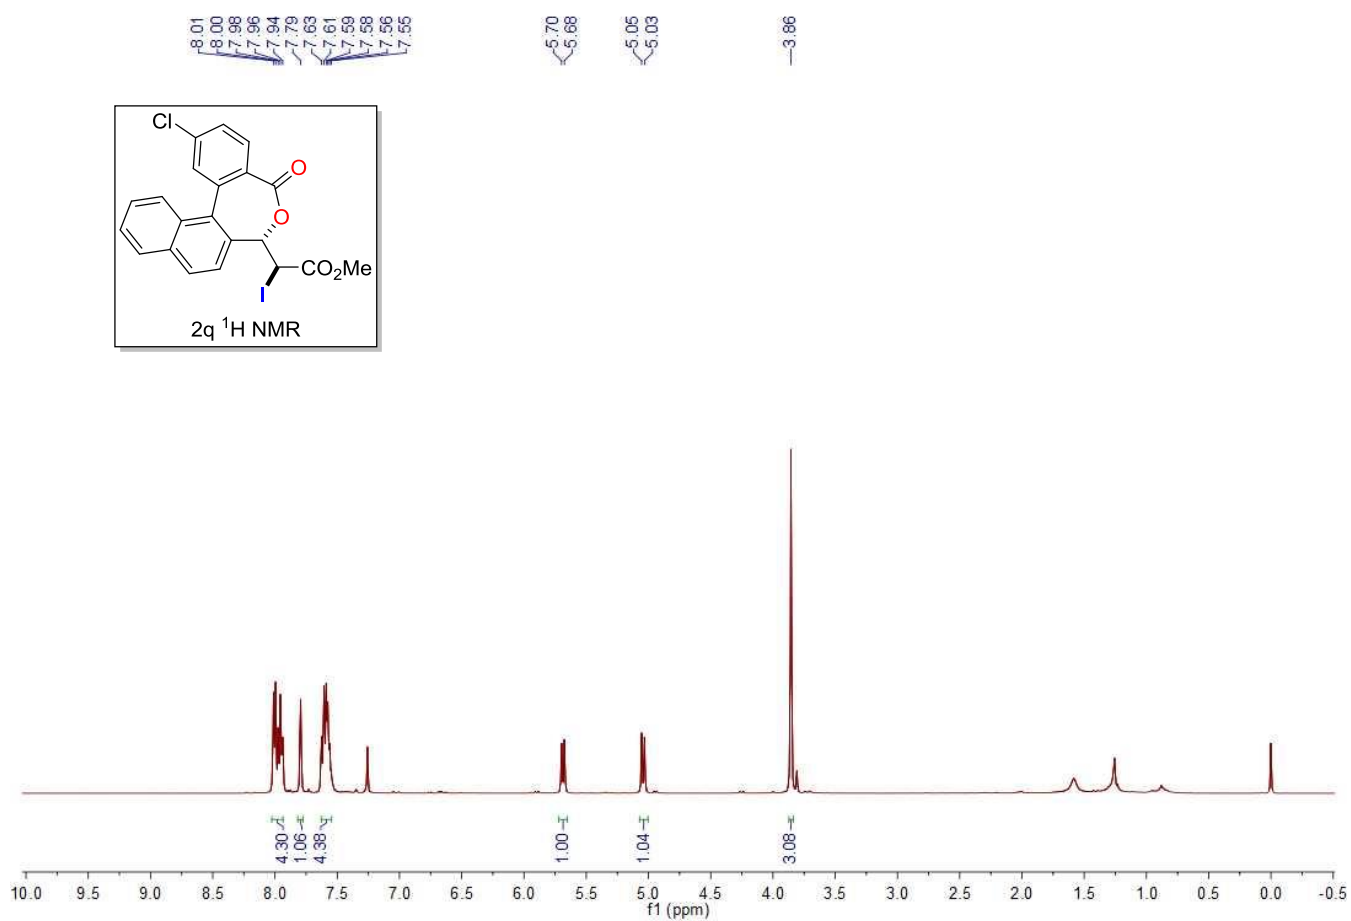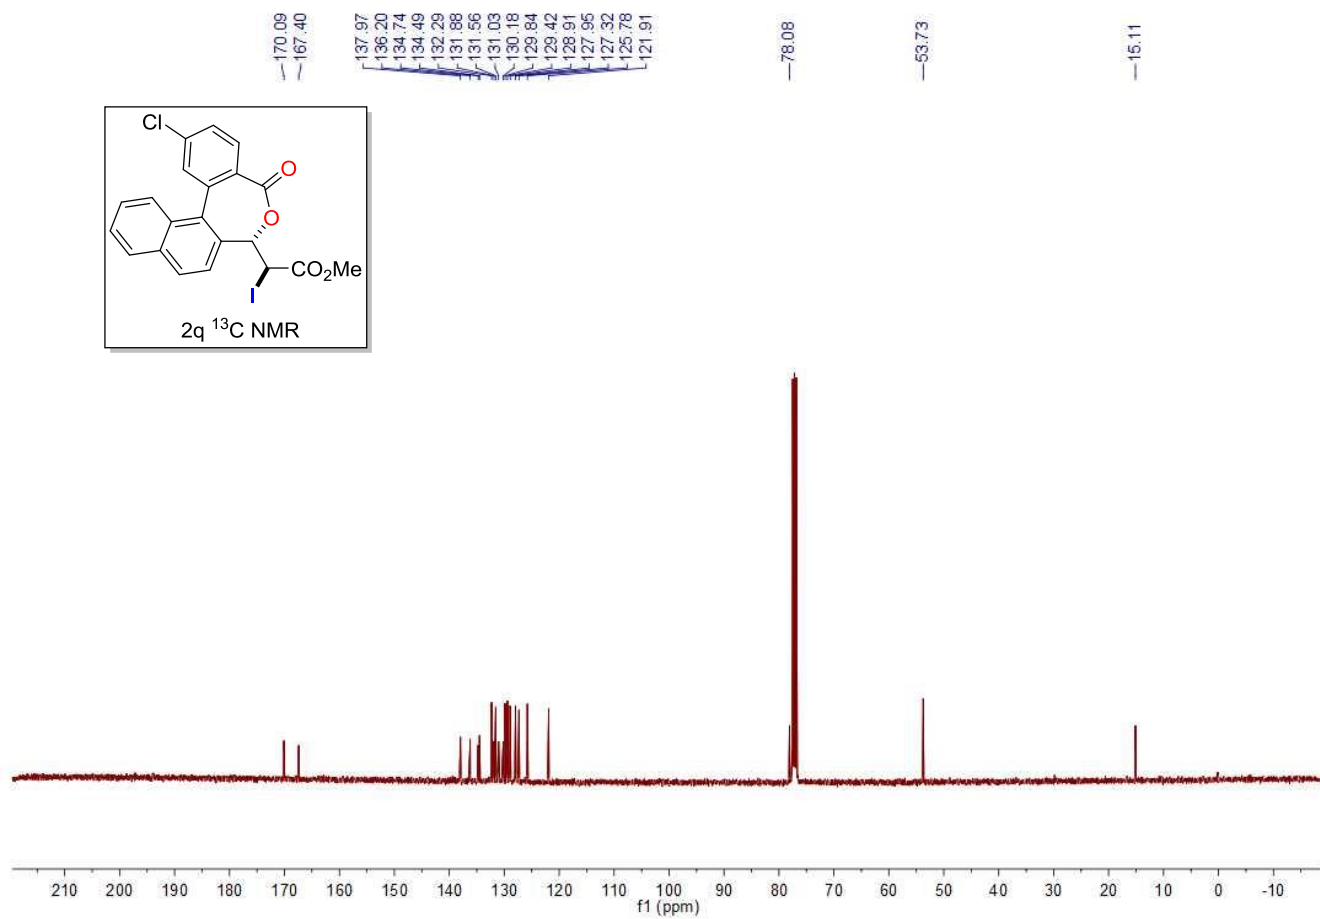

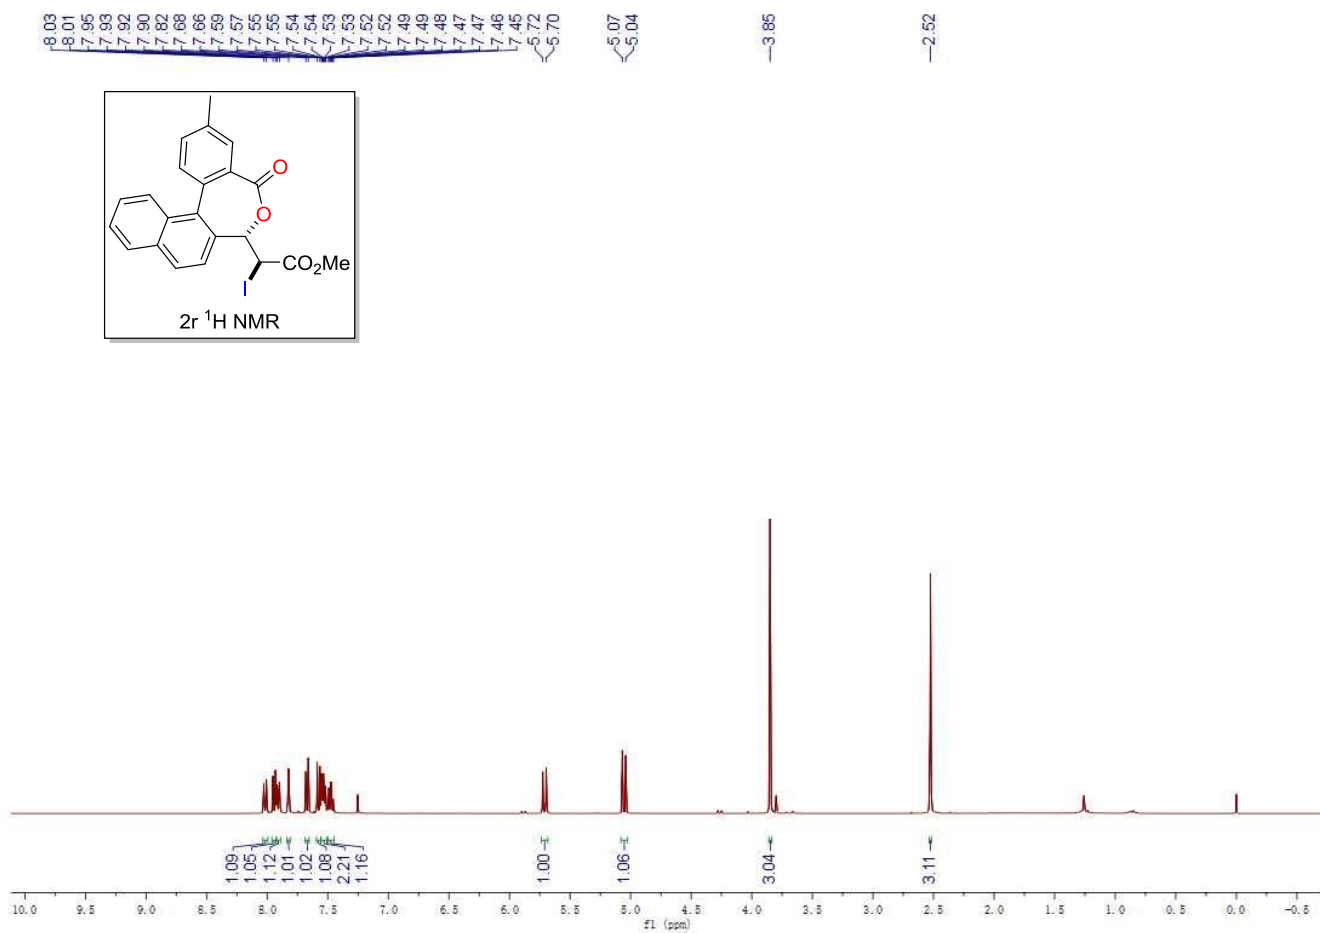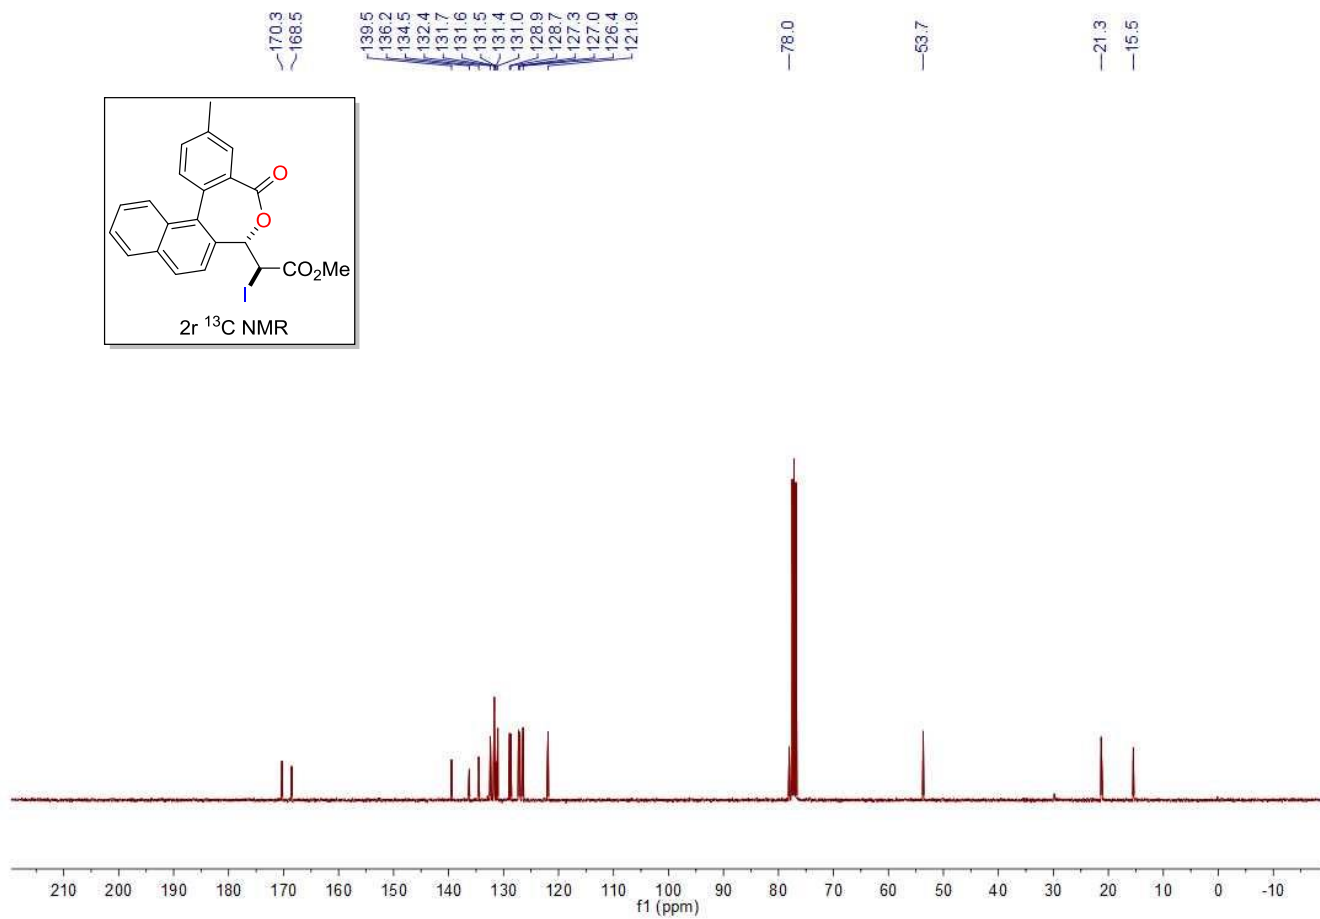

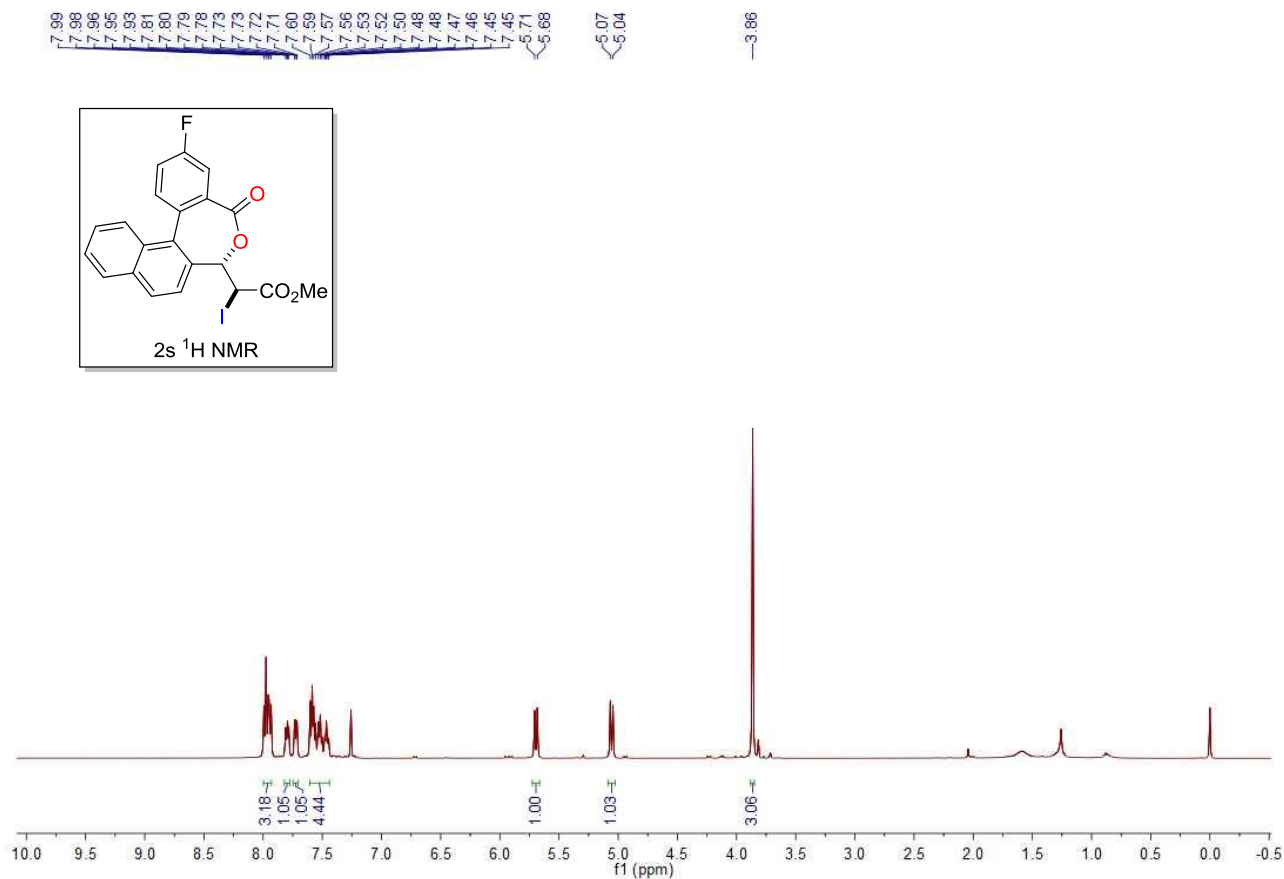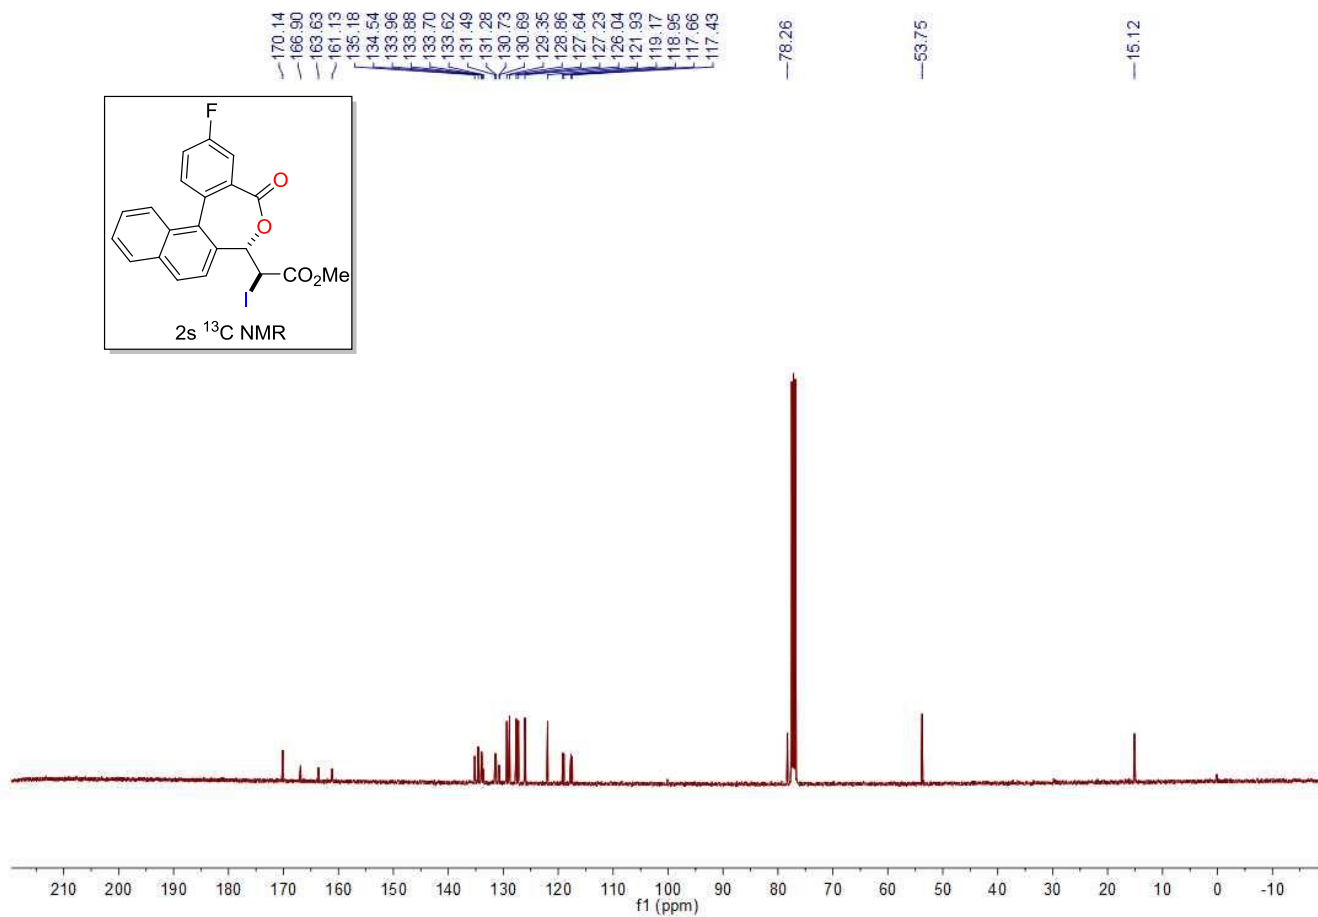

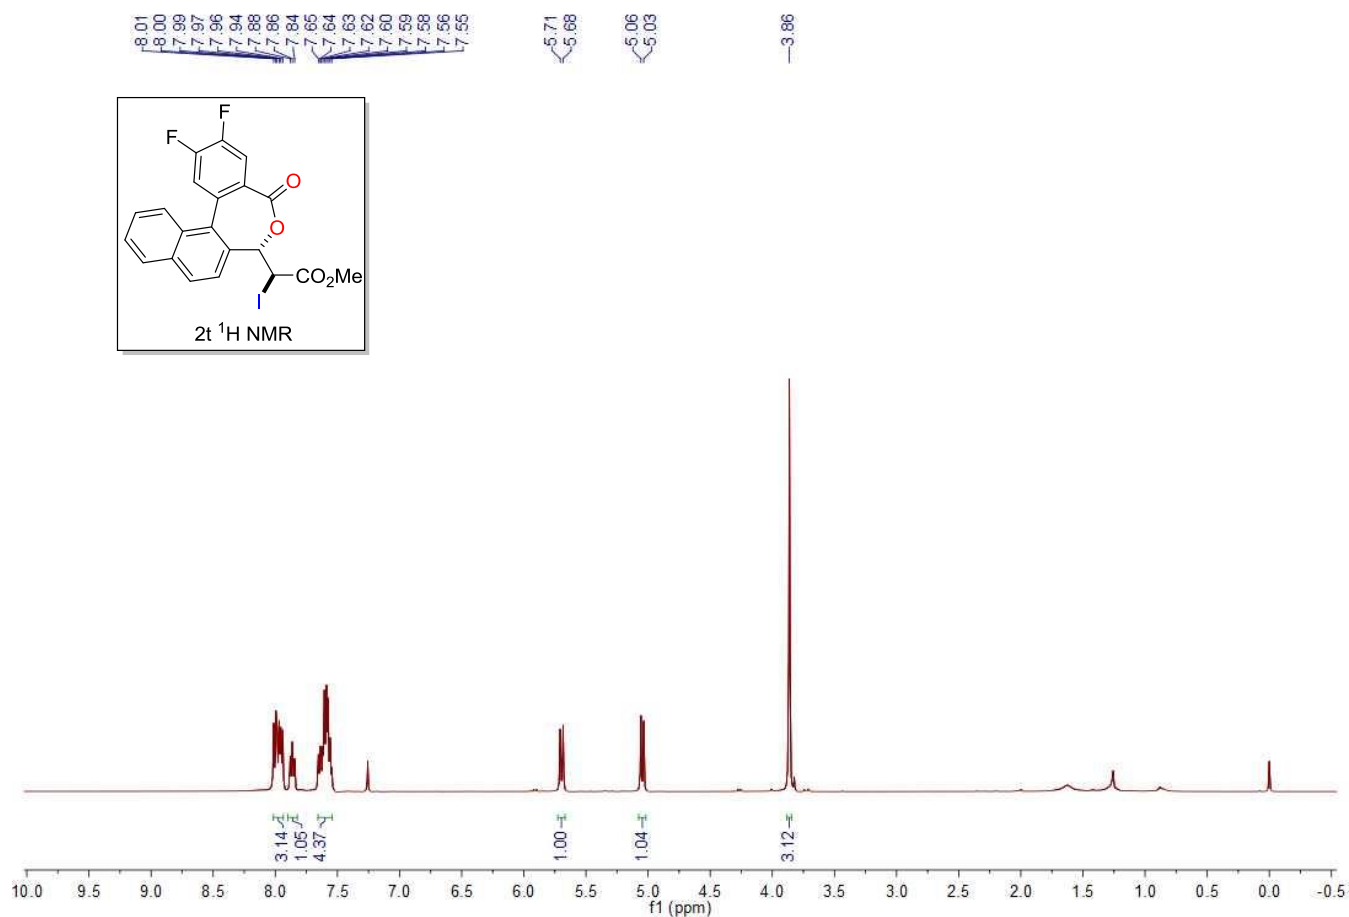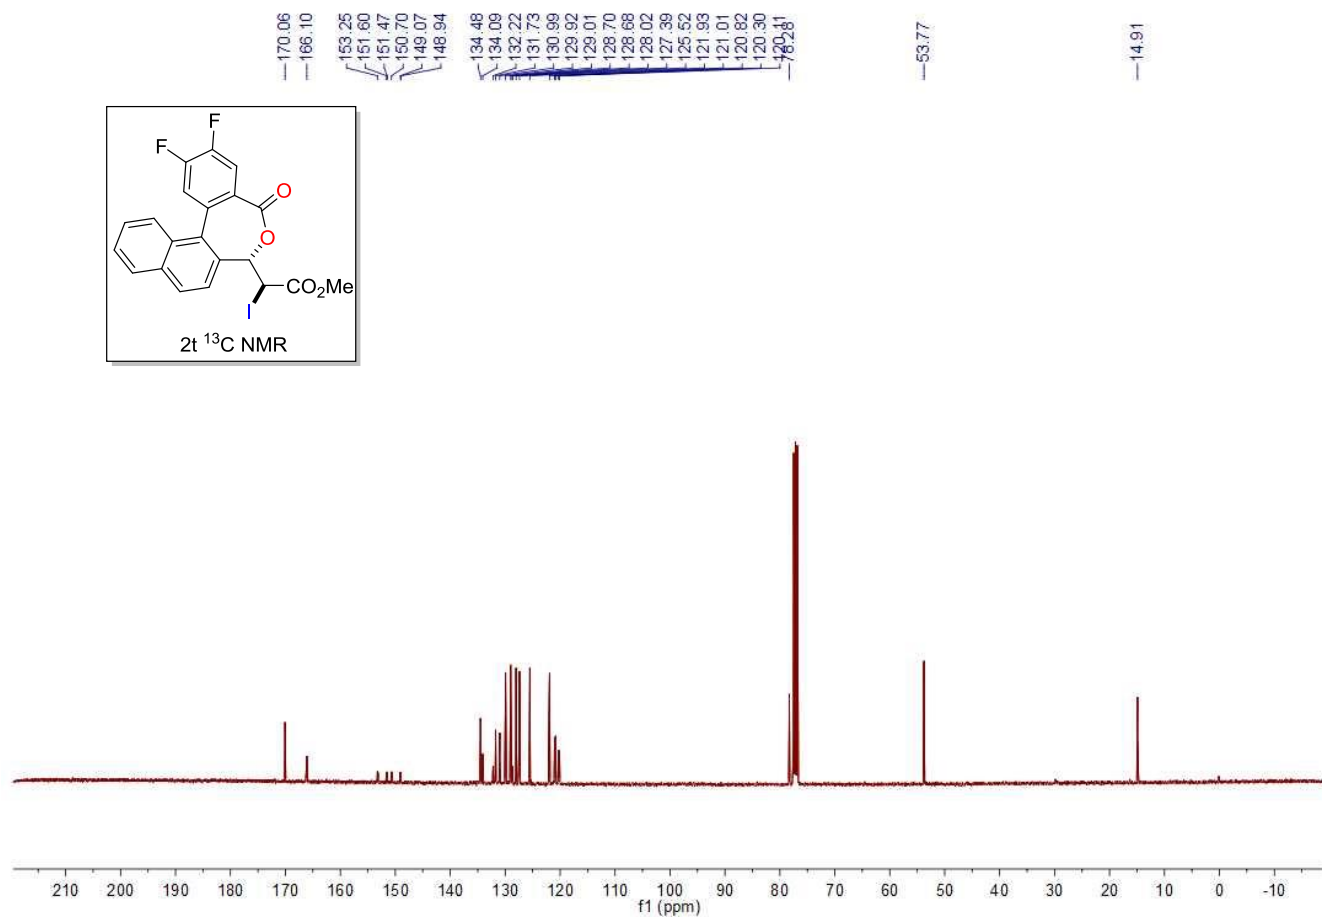

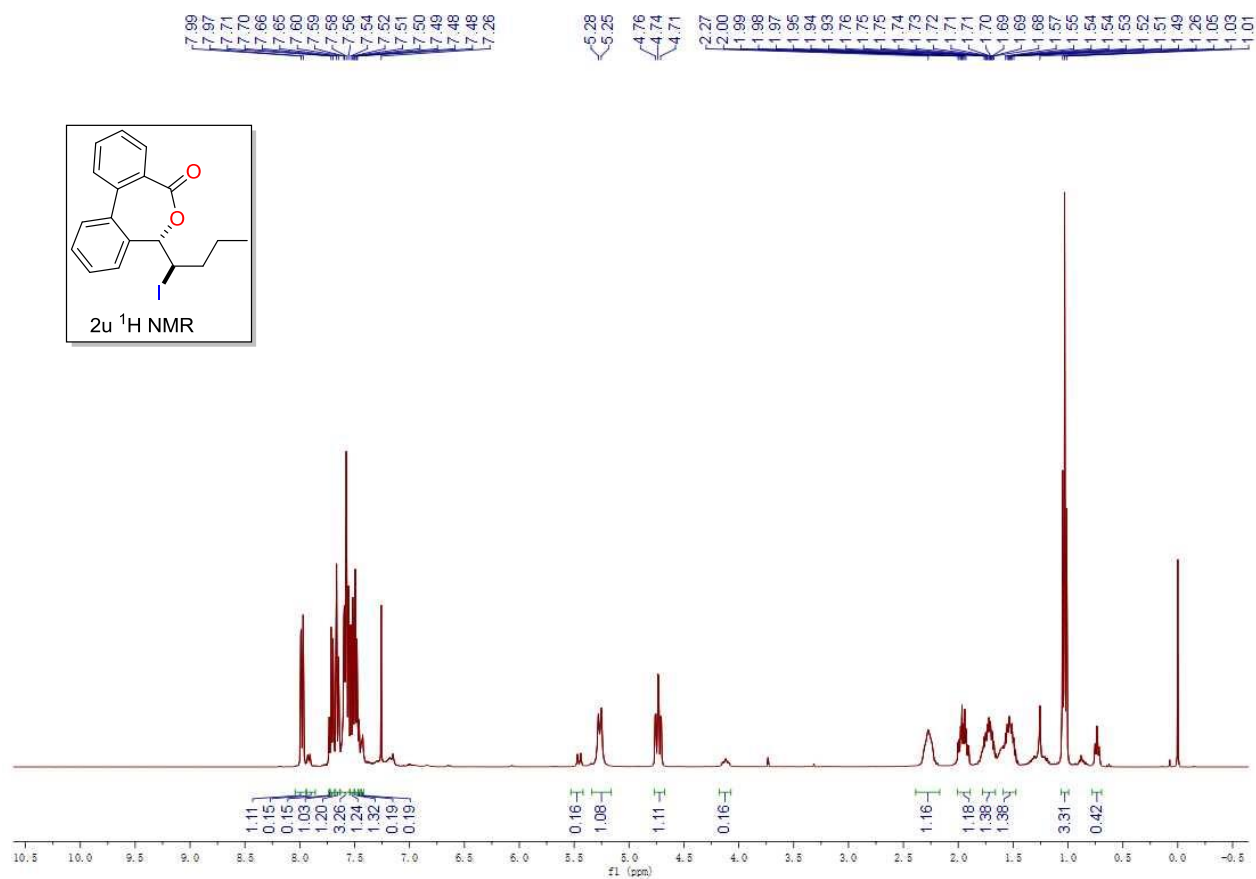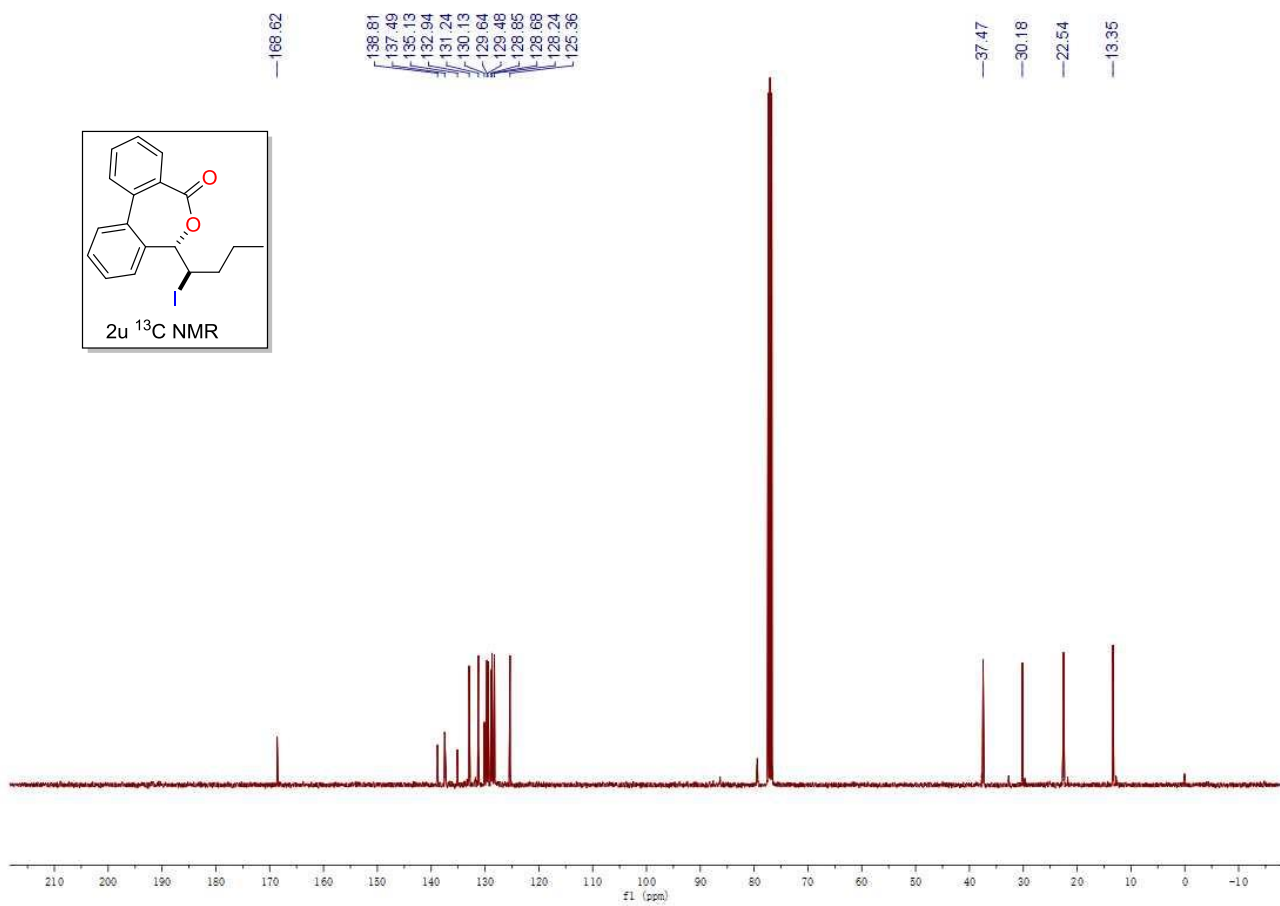

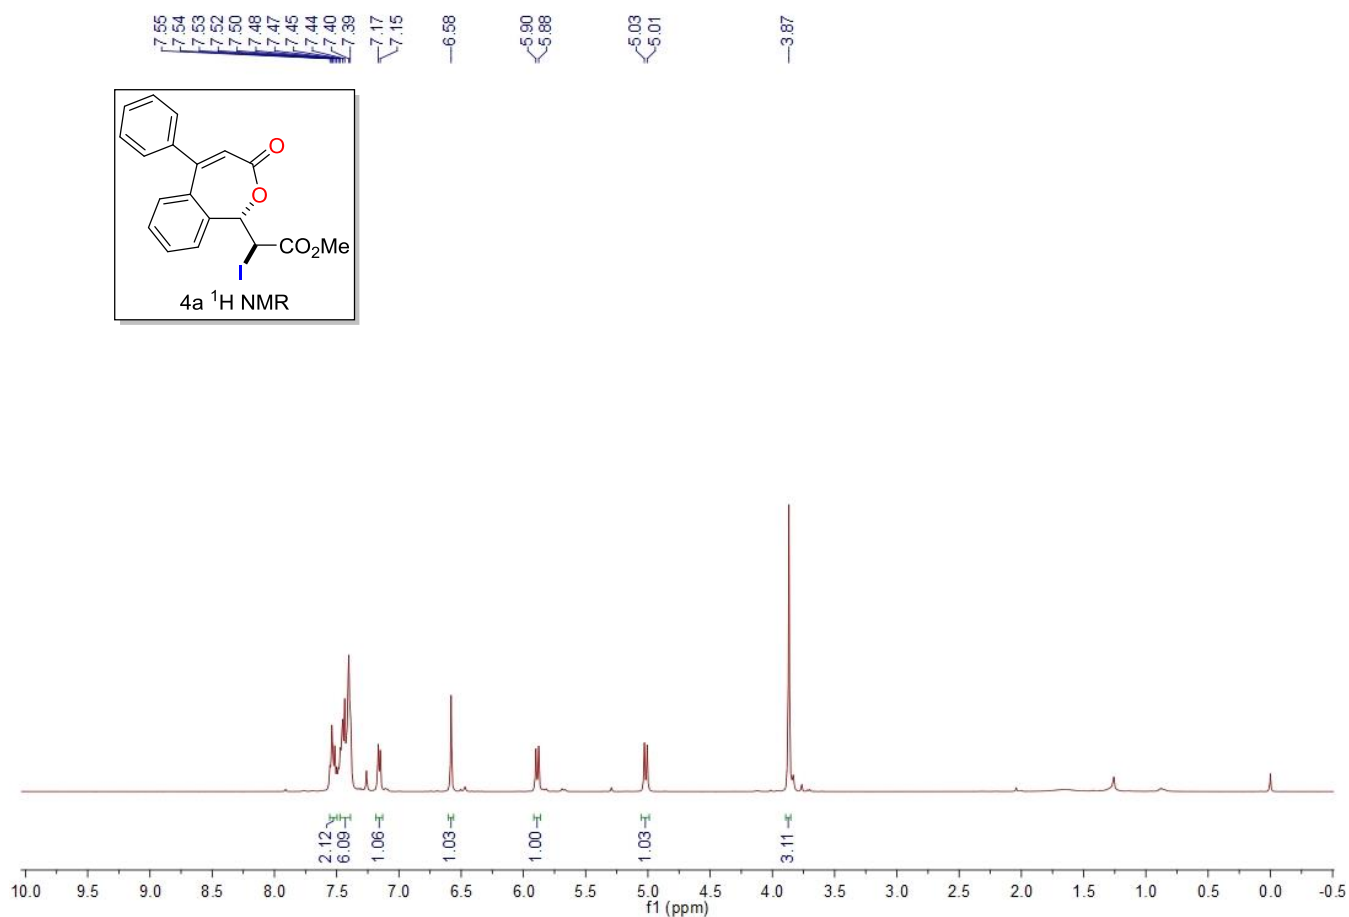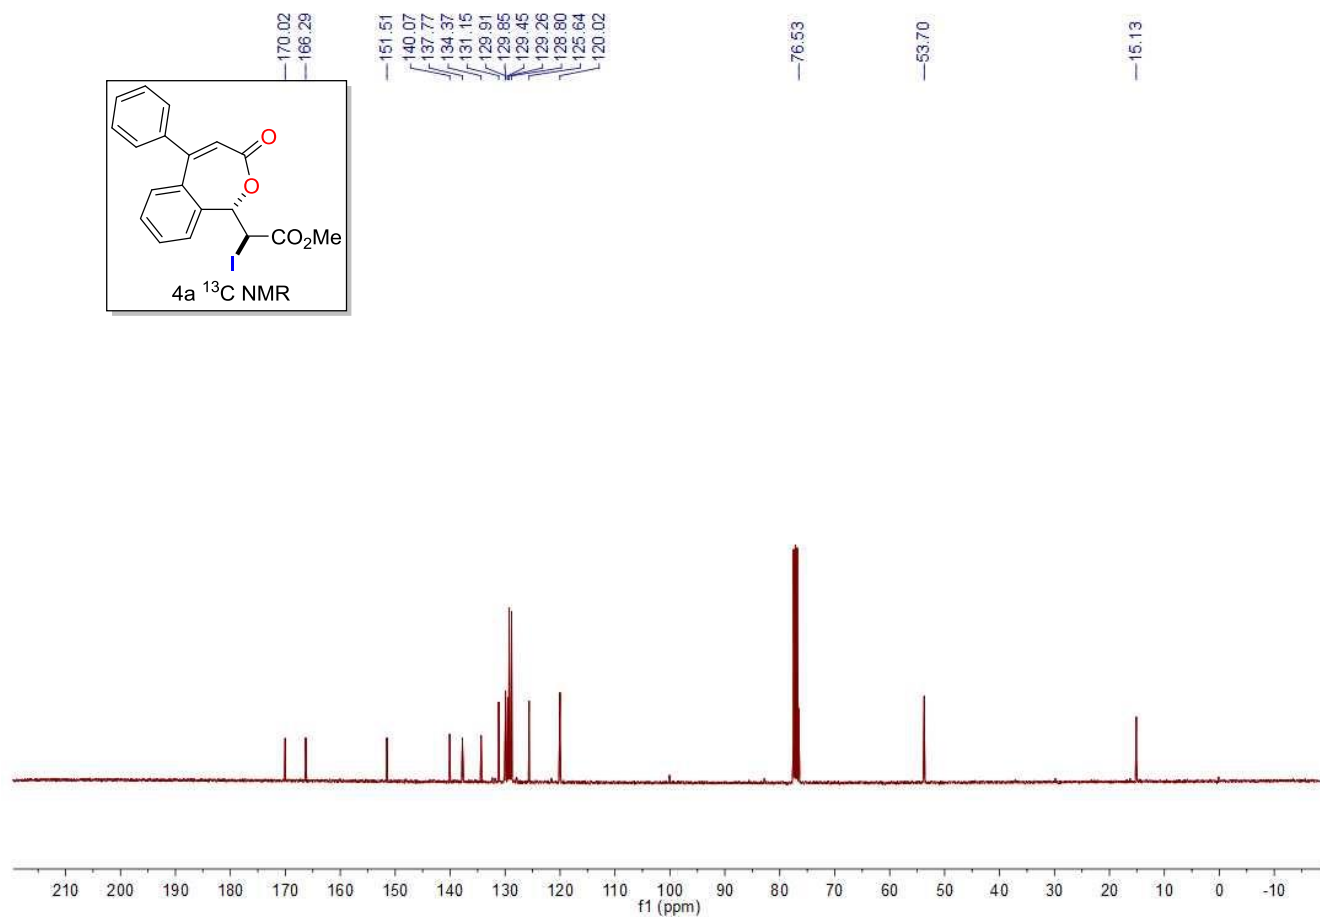



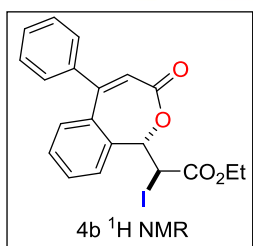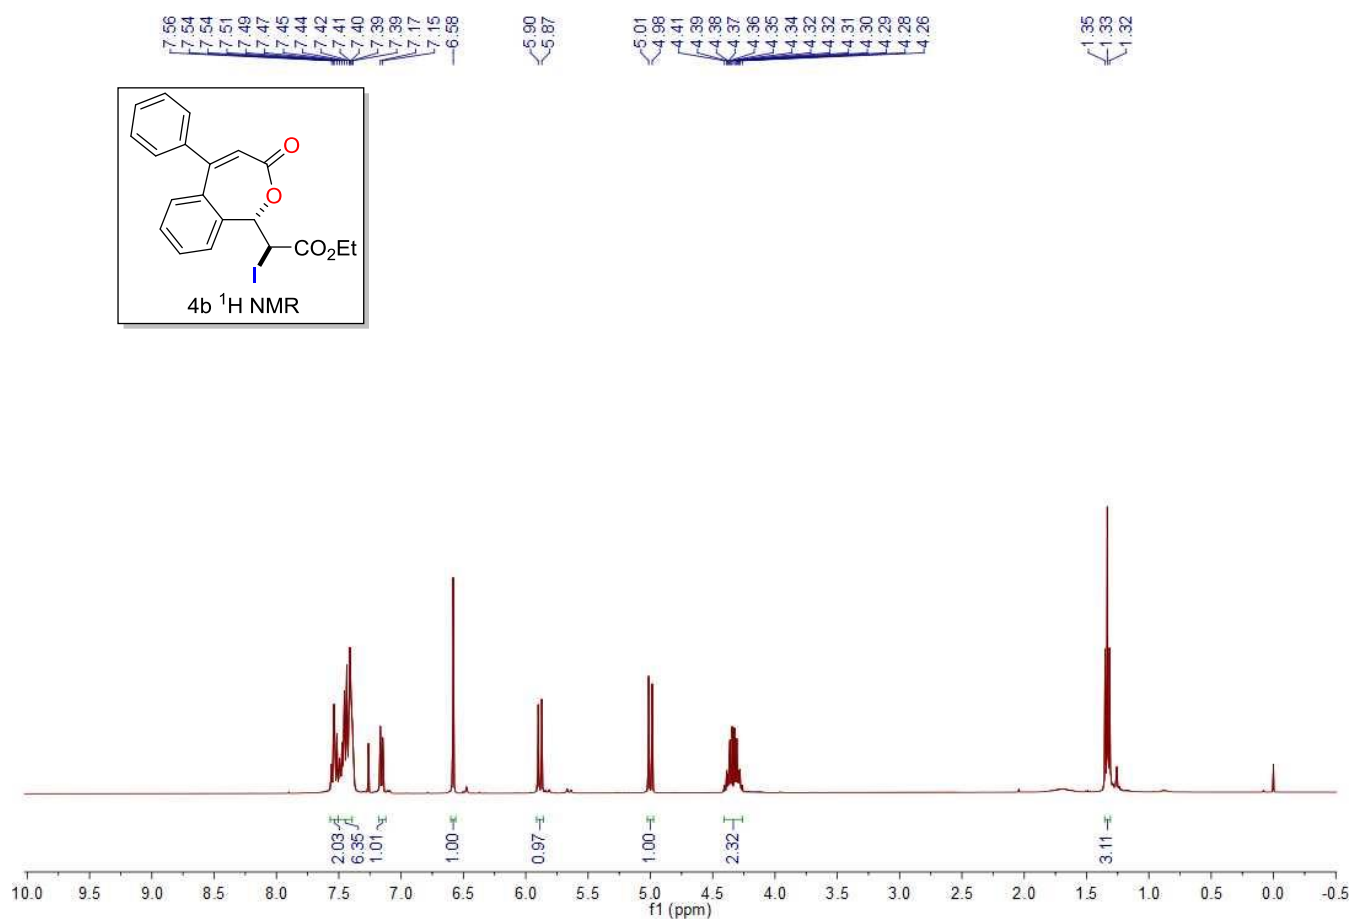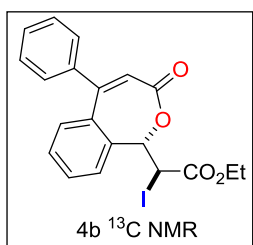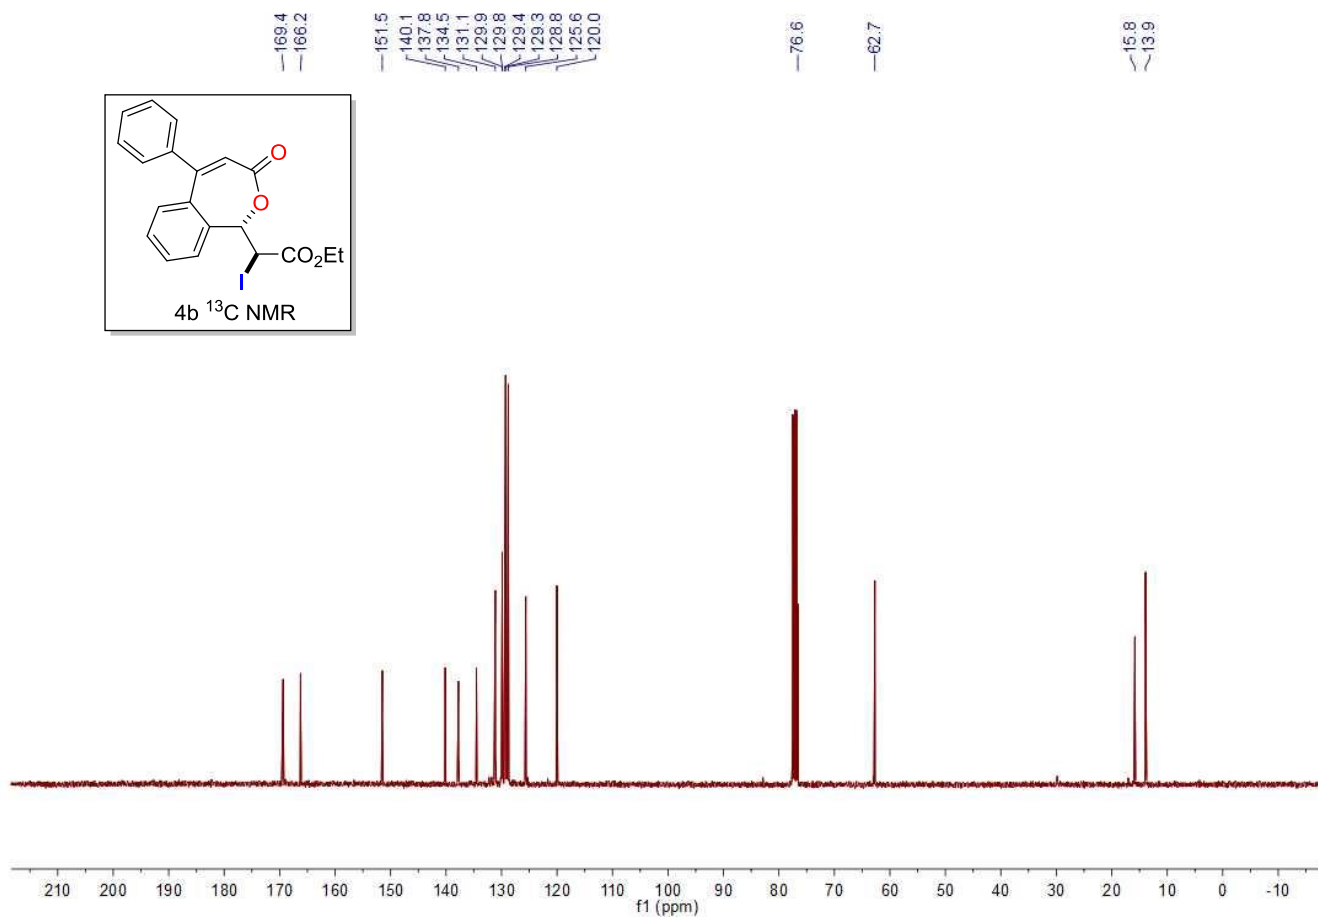

7.52  
7.46  
7.46  
7.45  
7.45  
7.44  
7.42  
7.41  
7.40  
7.39  
7.38  
7.37  
7.37  
7.36  
7.35  
7.34  
7.16  
7.14  
—6.54  
—5.91  
—5.88  
—5.35  
—5.32  
—5.26  
—5.23  
—5.07  
—5.04

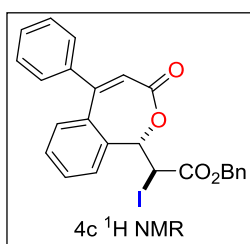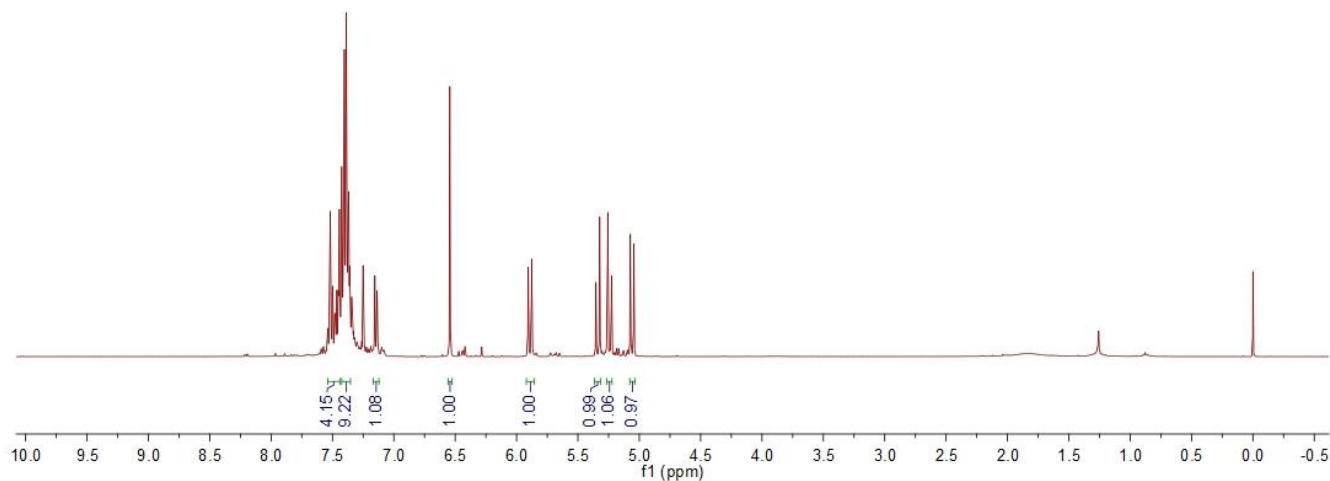

—169.22  
—166.19  
—151.45  
—140.11  
—137.80  
—134.87  
—134.45  
—131.16  
—129.89  
—129.84  
—129.43  
—129.28  
—128.79  
—128.72  
—128.61  
—125.63  
—120.02  
—76.52  
—68.38  
—15.70

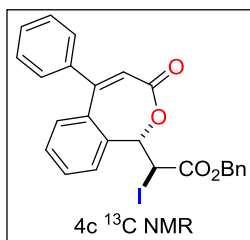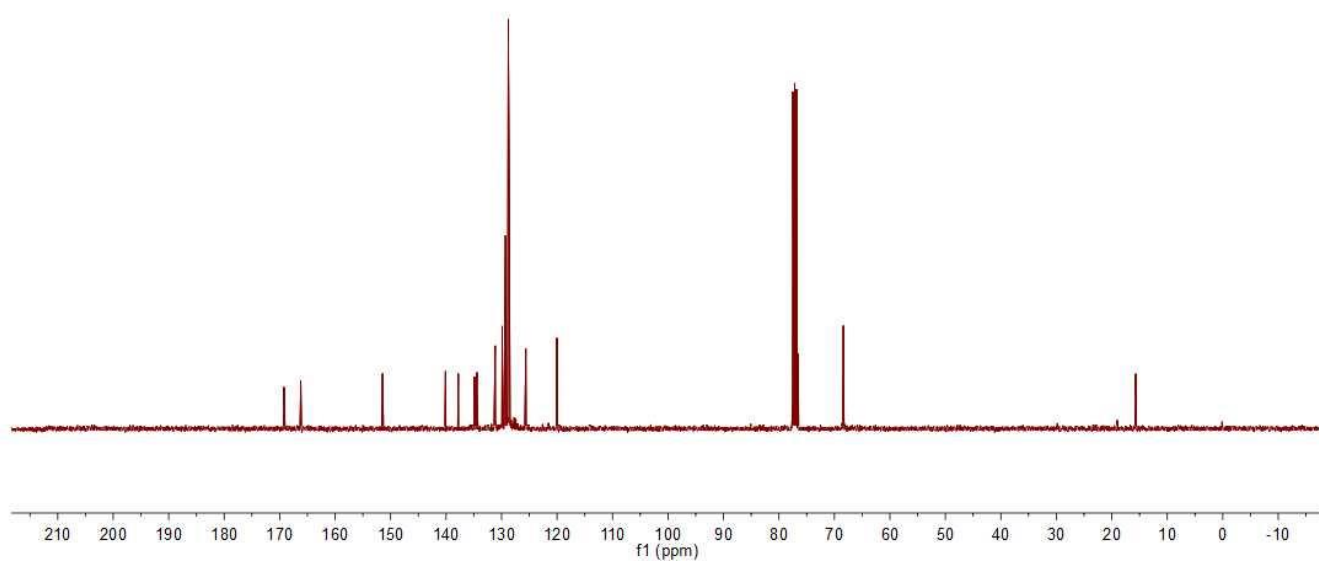



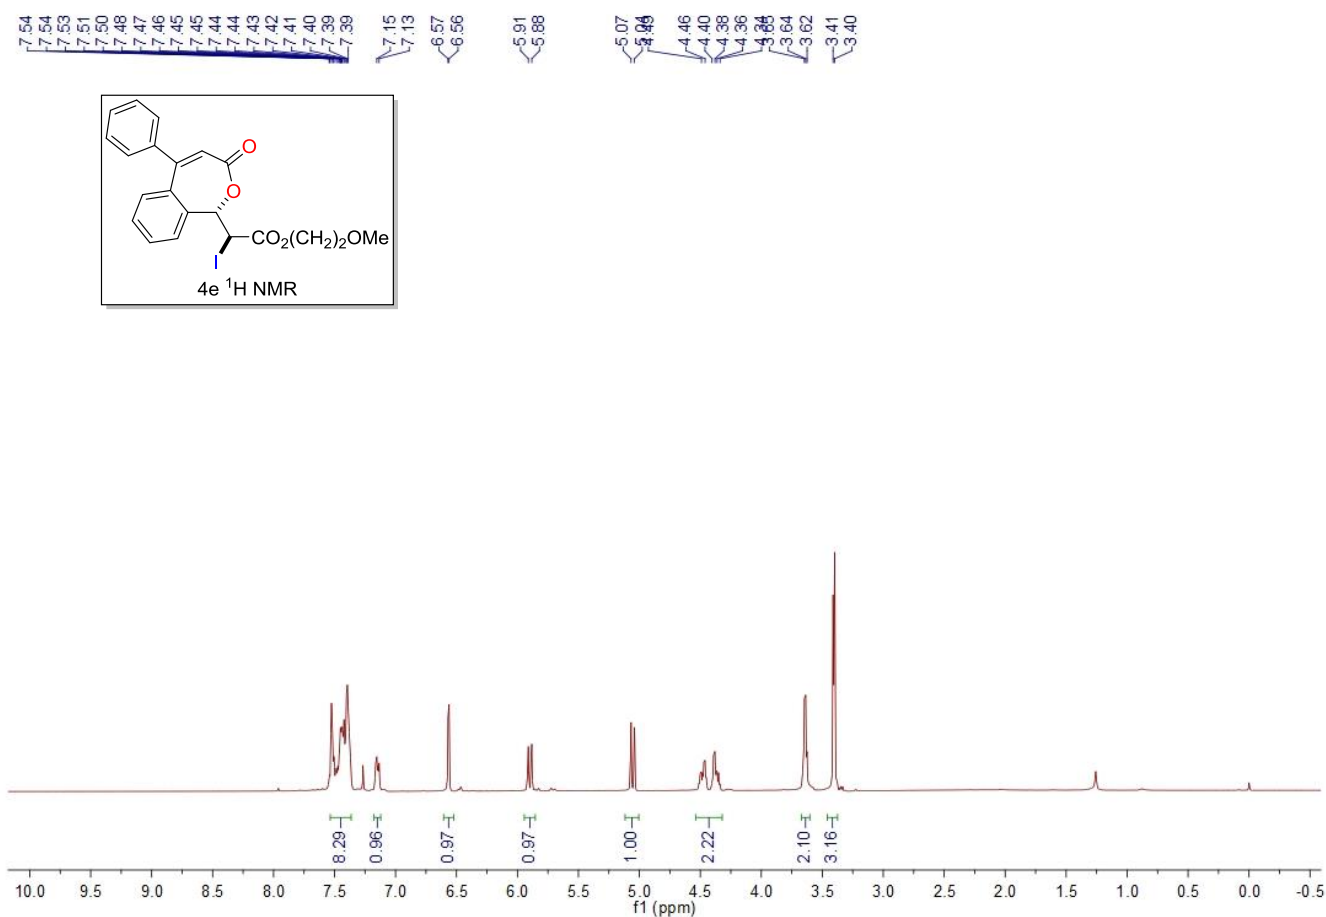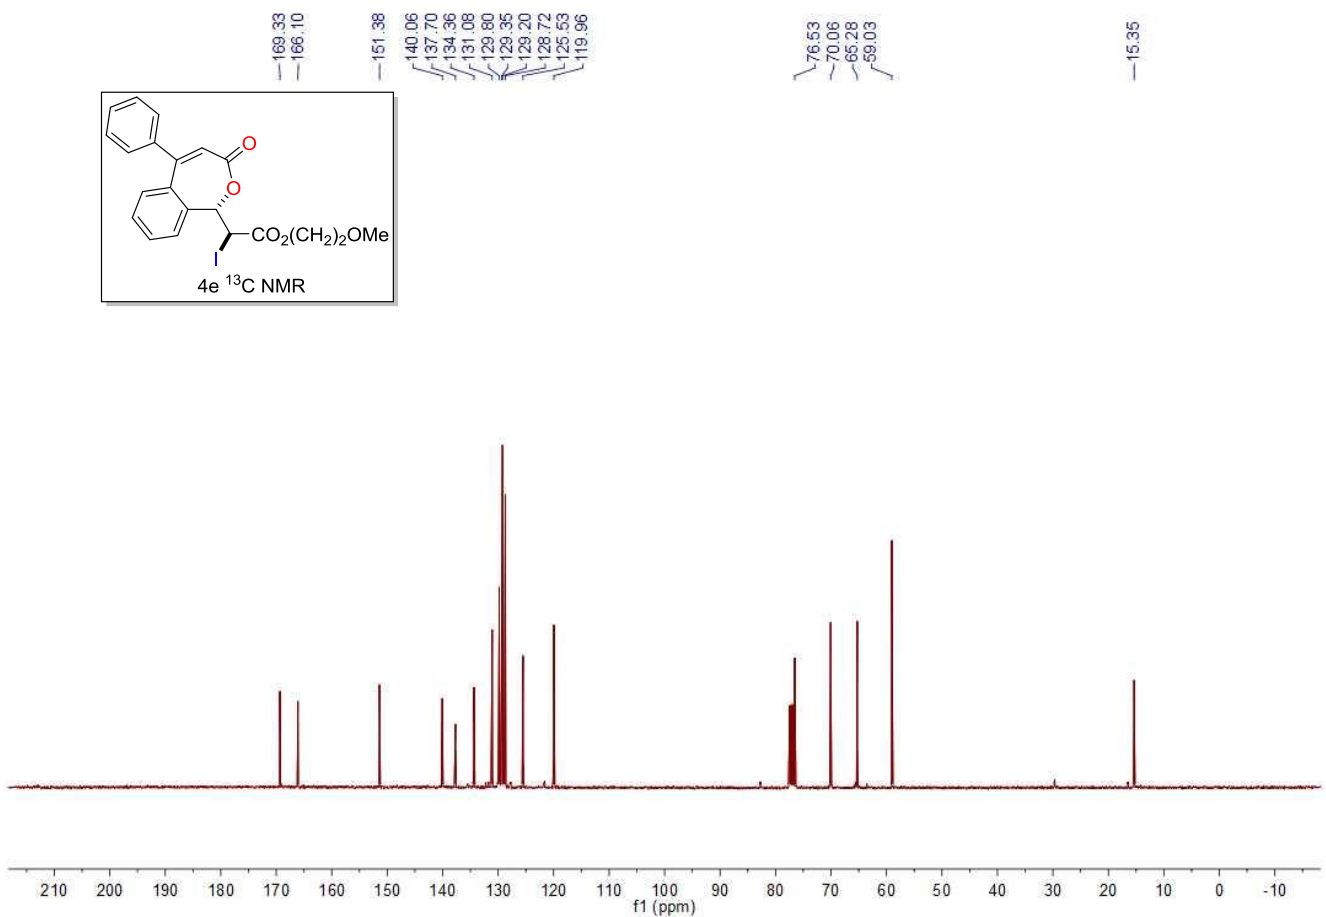

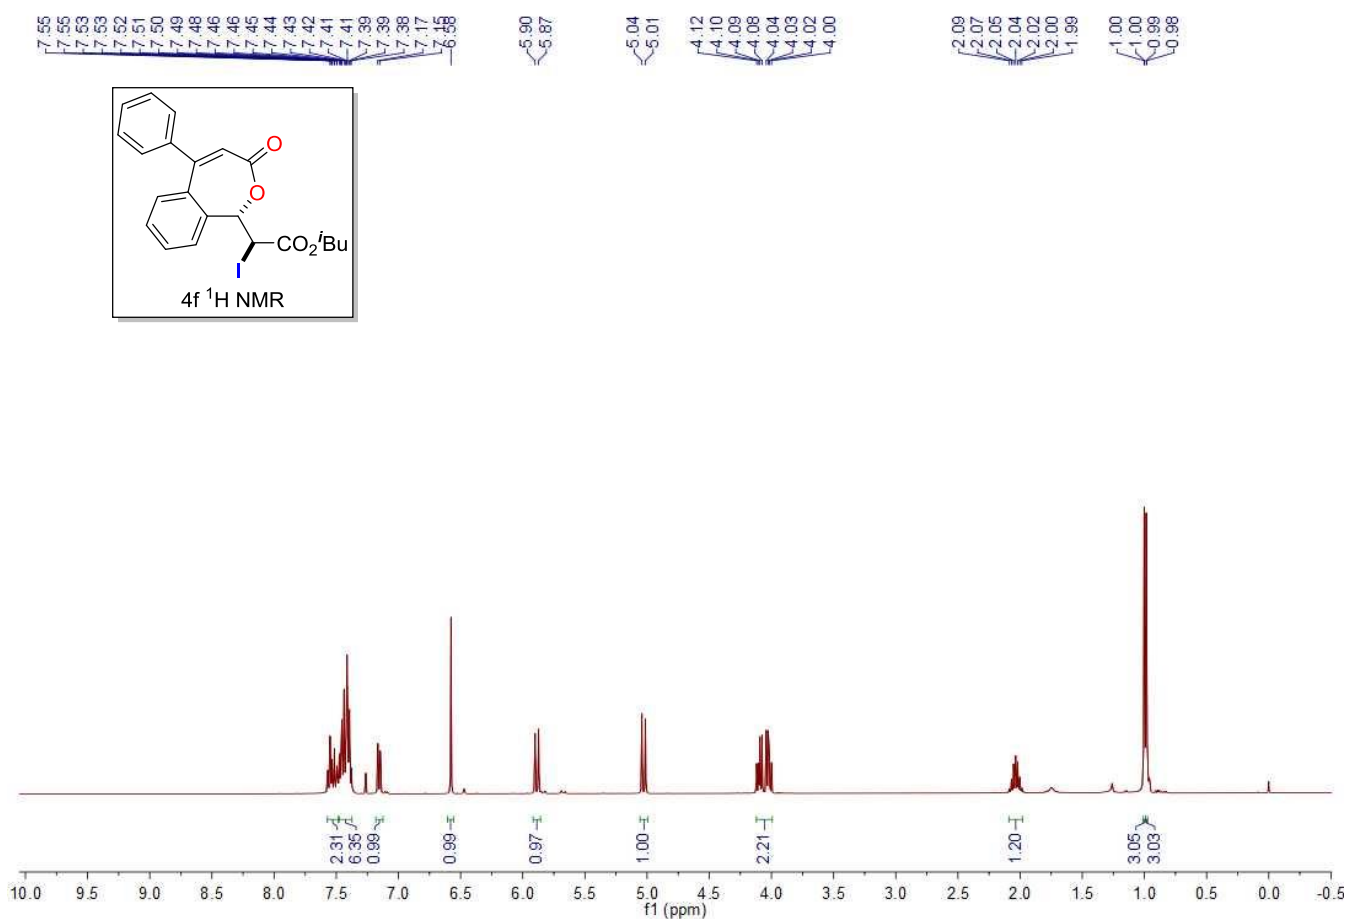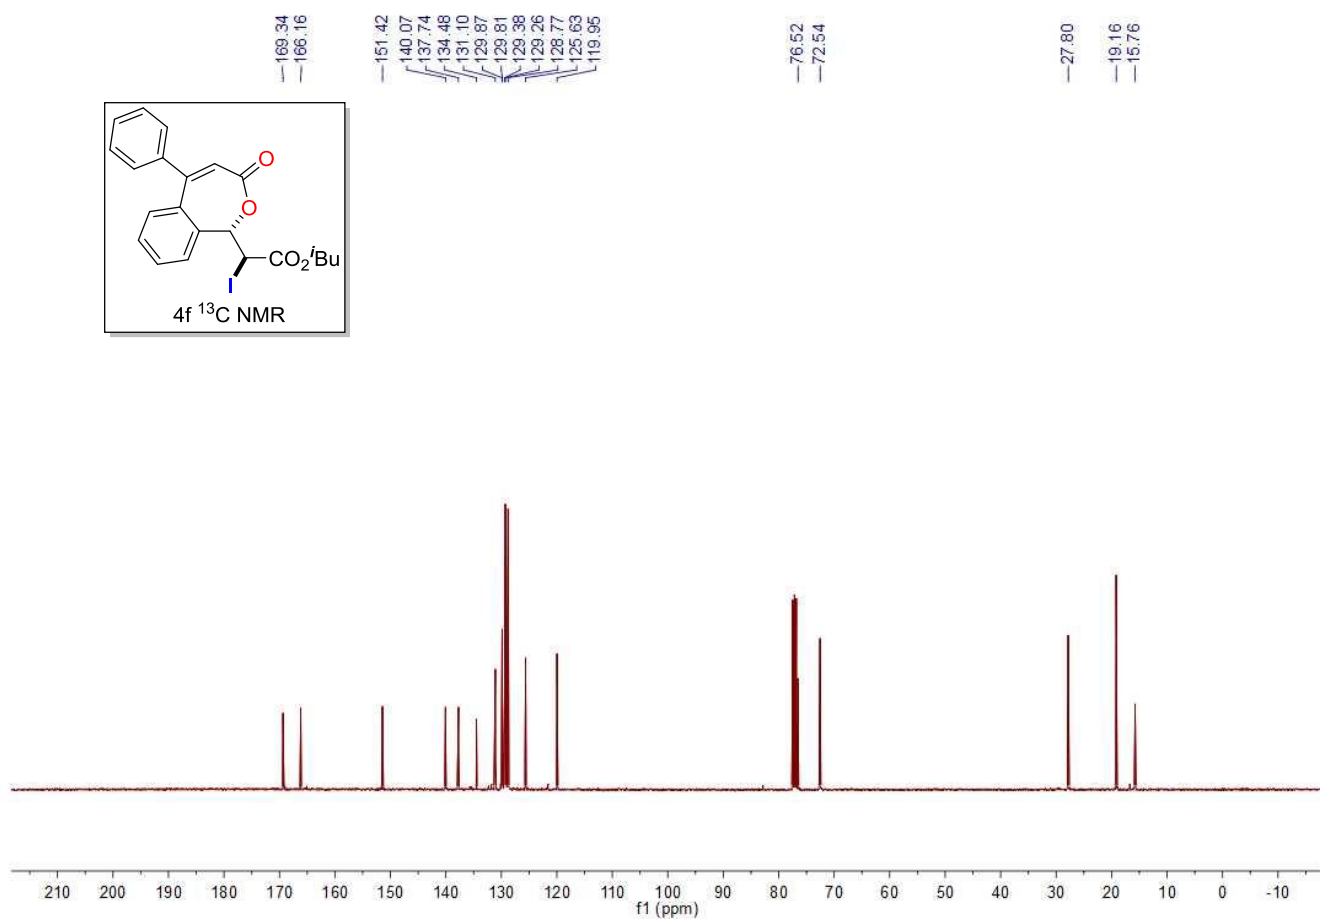

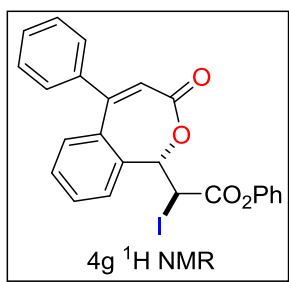

7.62, 7.60, 7.59, 7.57, 7.55, 7.48, 7.46, 7.44, 7.43, 7.41, 7.30, 7.28, 7.21, 7.19, 6.80, 6.01, 5.99, 5.25, 5.23

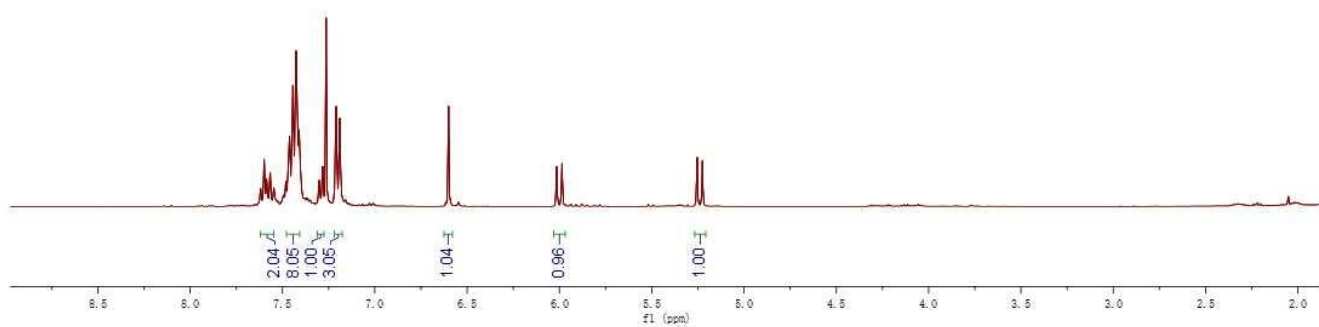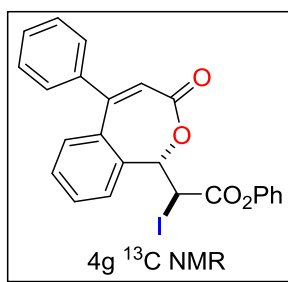

168.08, 166.16, 151.73, 150.50, 140.16, 137.85, 134.32, 131.36, 130.01, 129.97, 129.74, 129.59, 129.33, 128.84, 126.63, 125.52, 121.23, 120.05, 76.71, 15.43

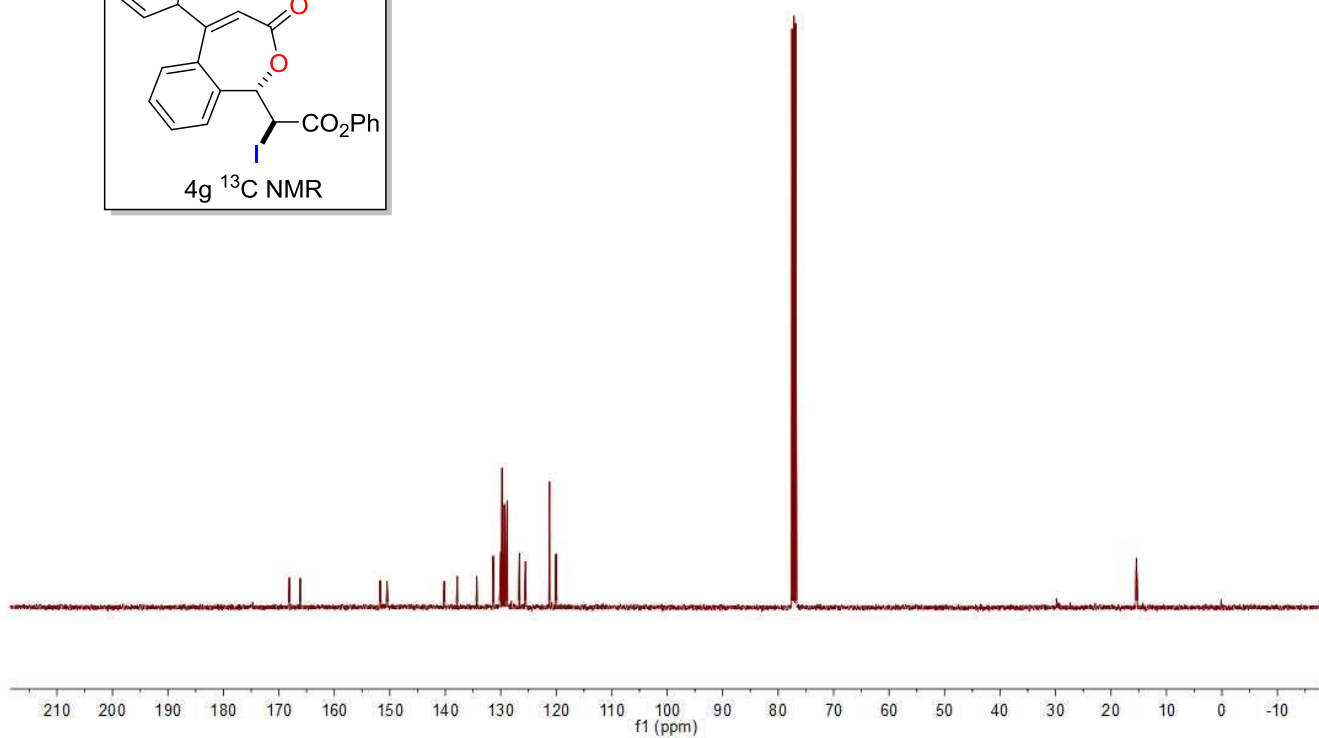

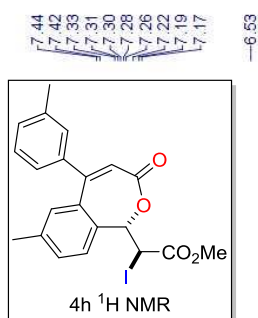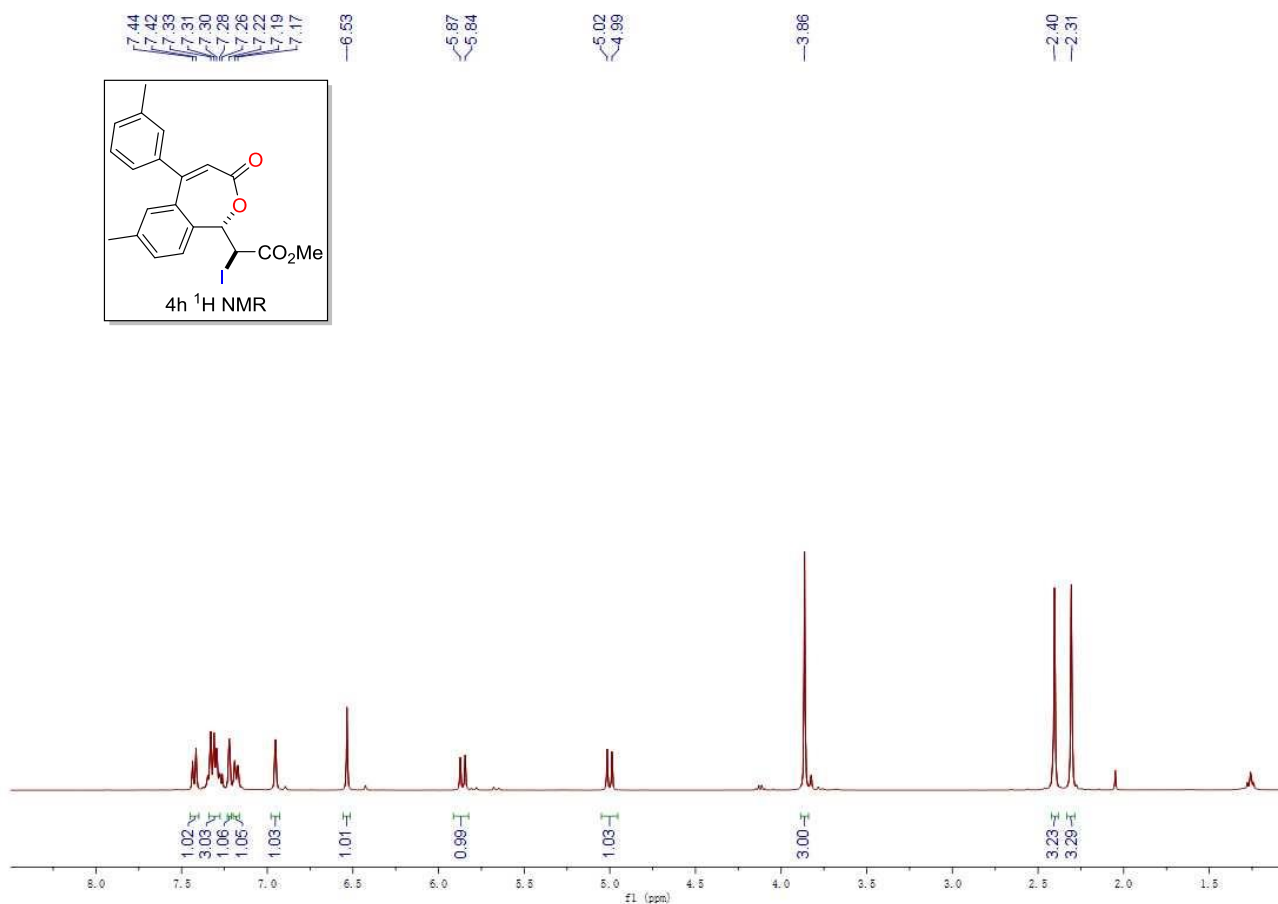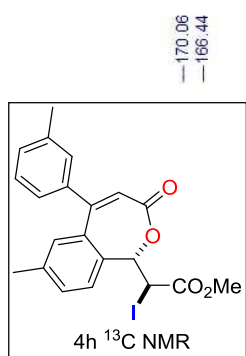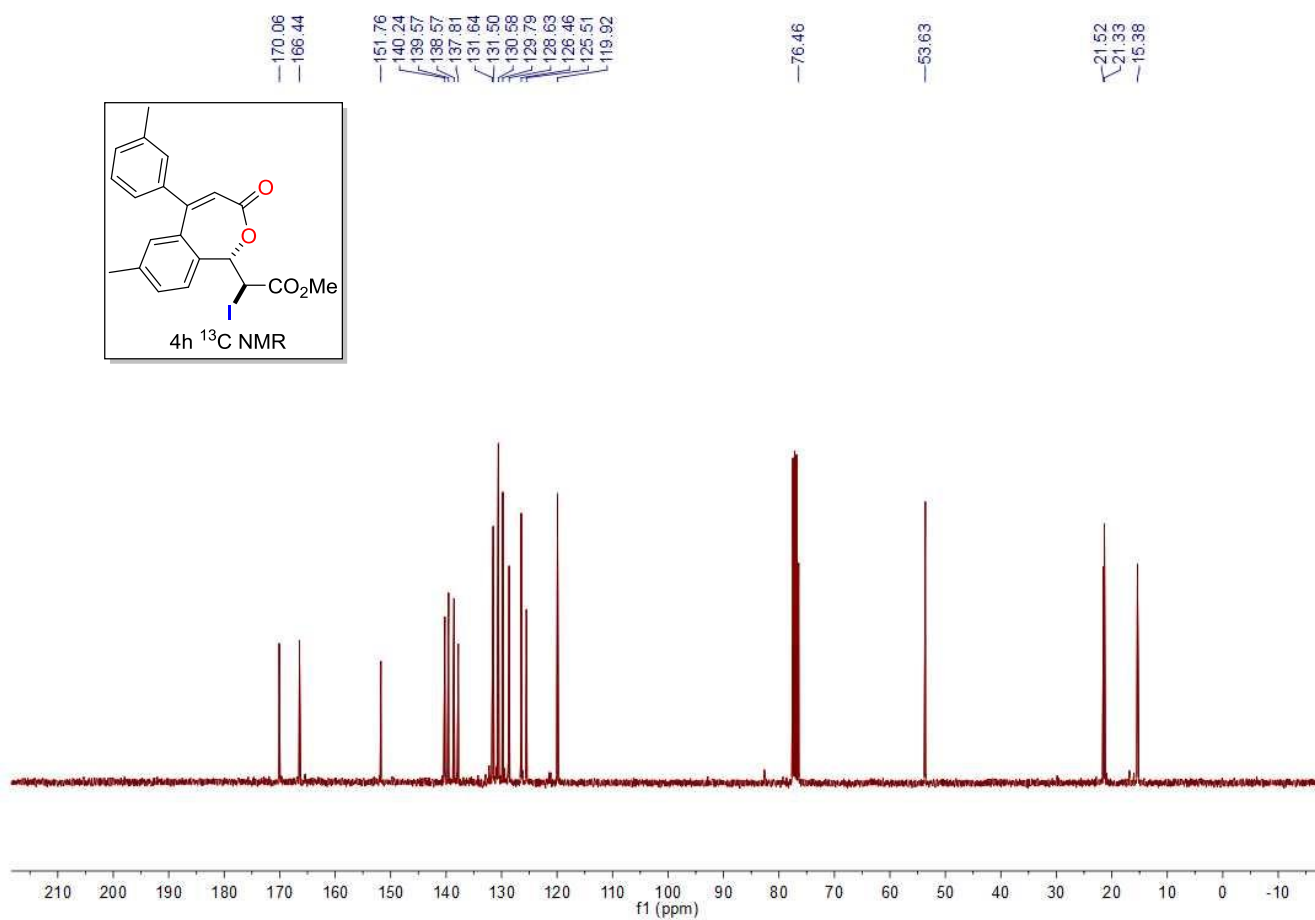

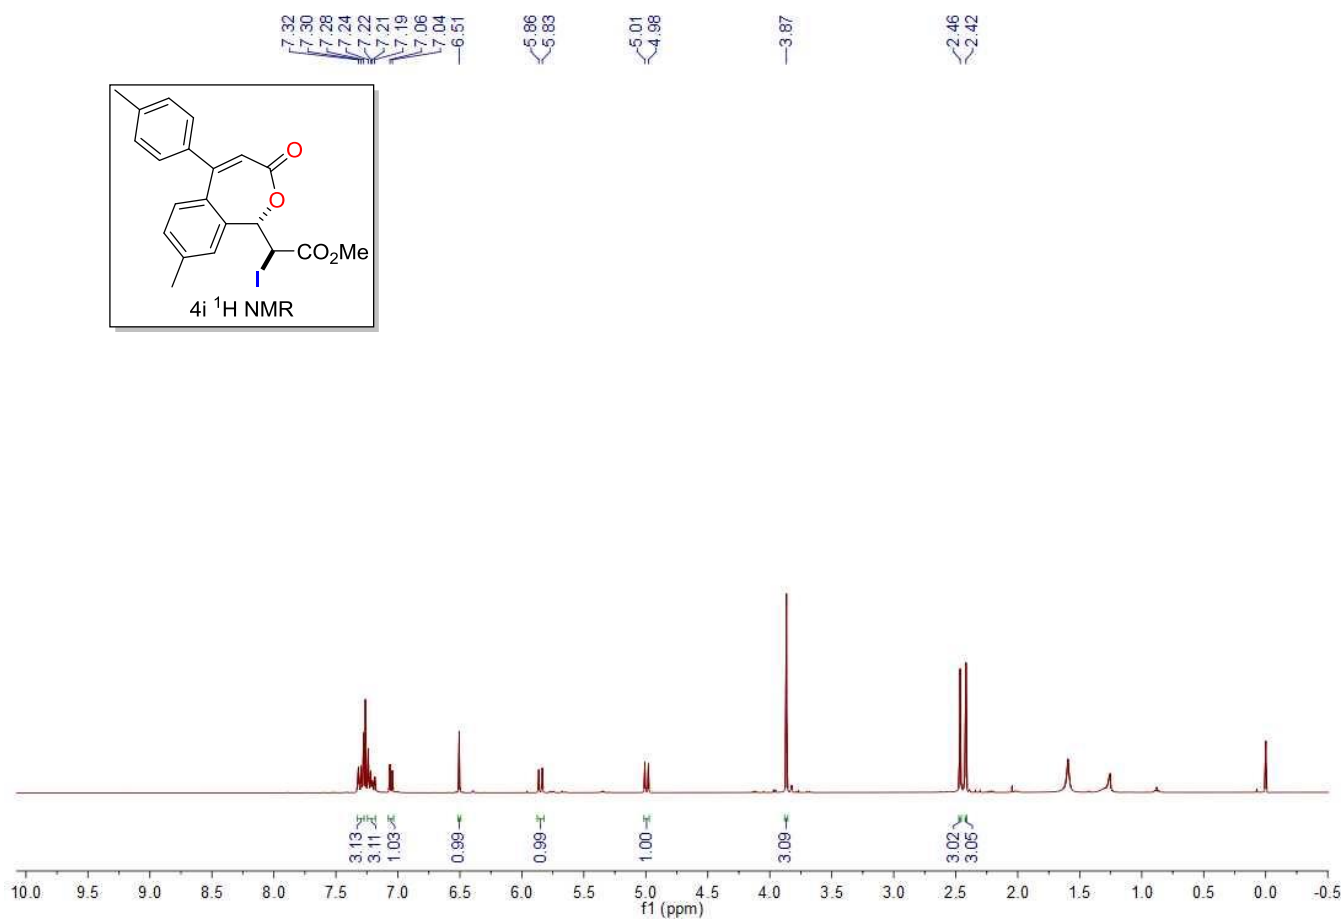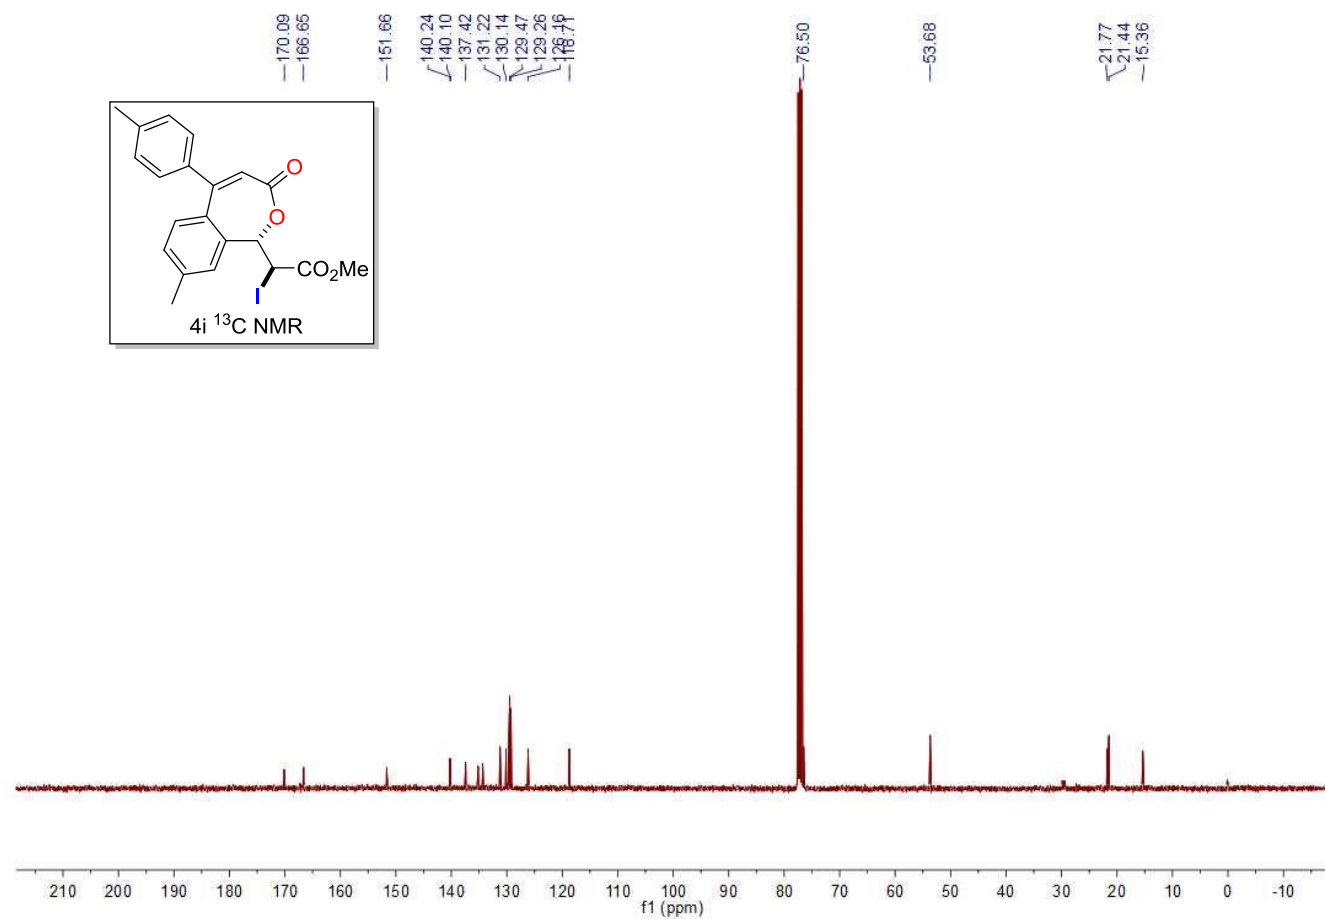



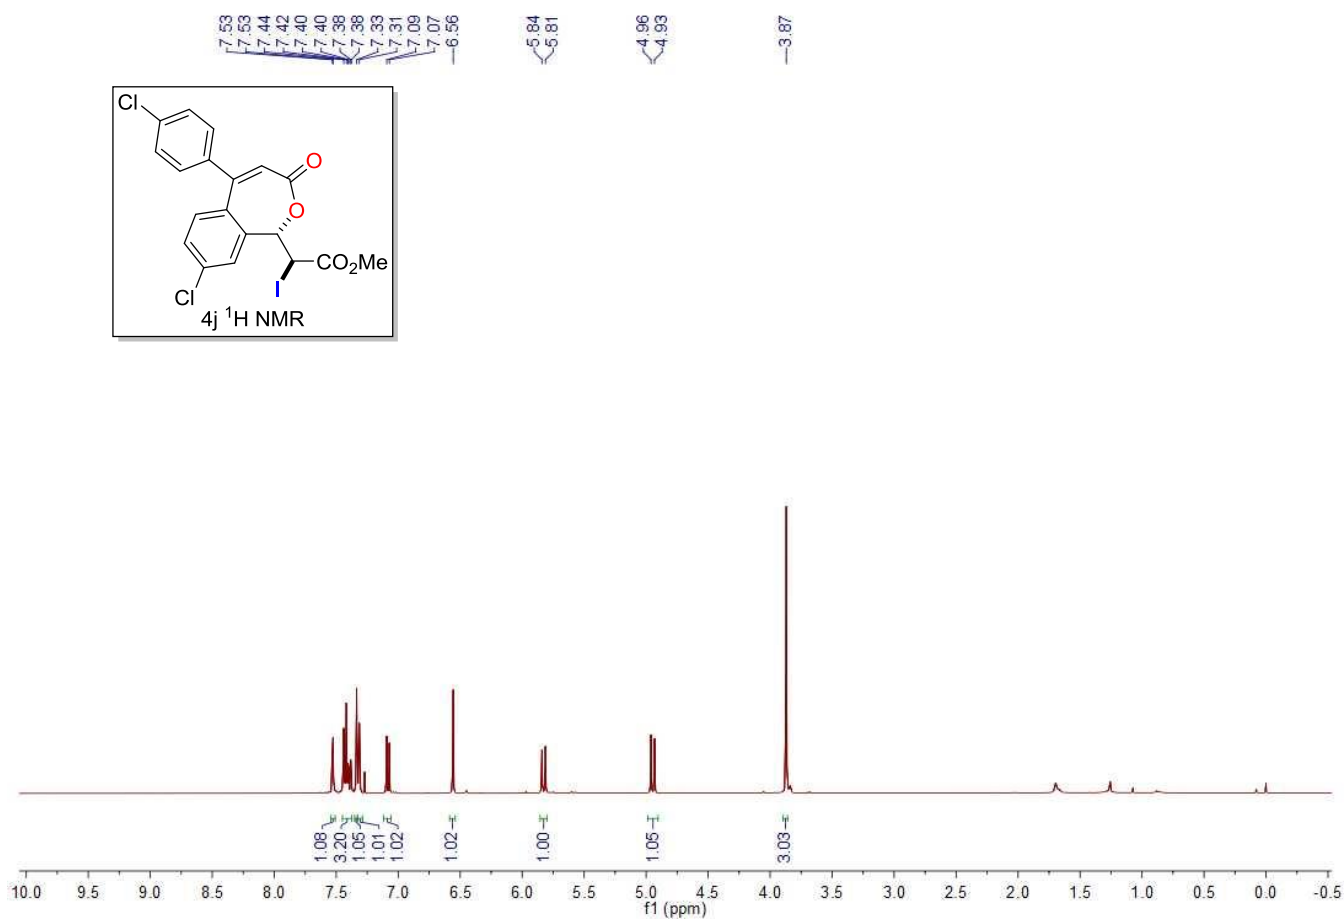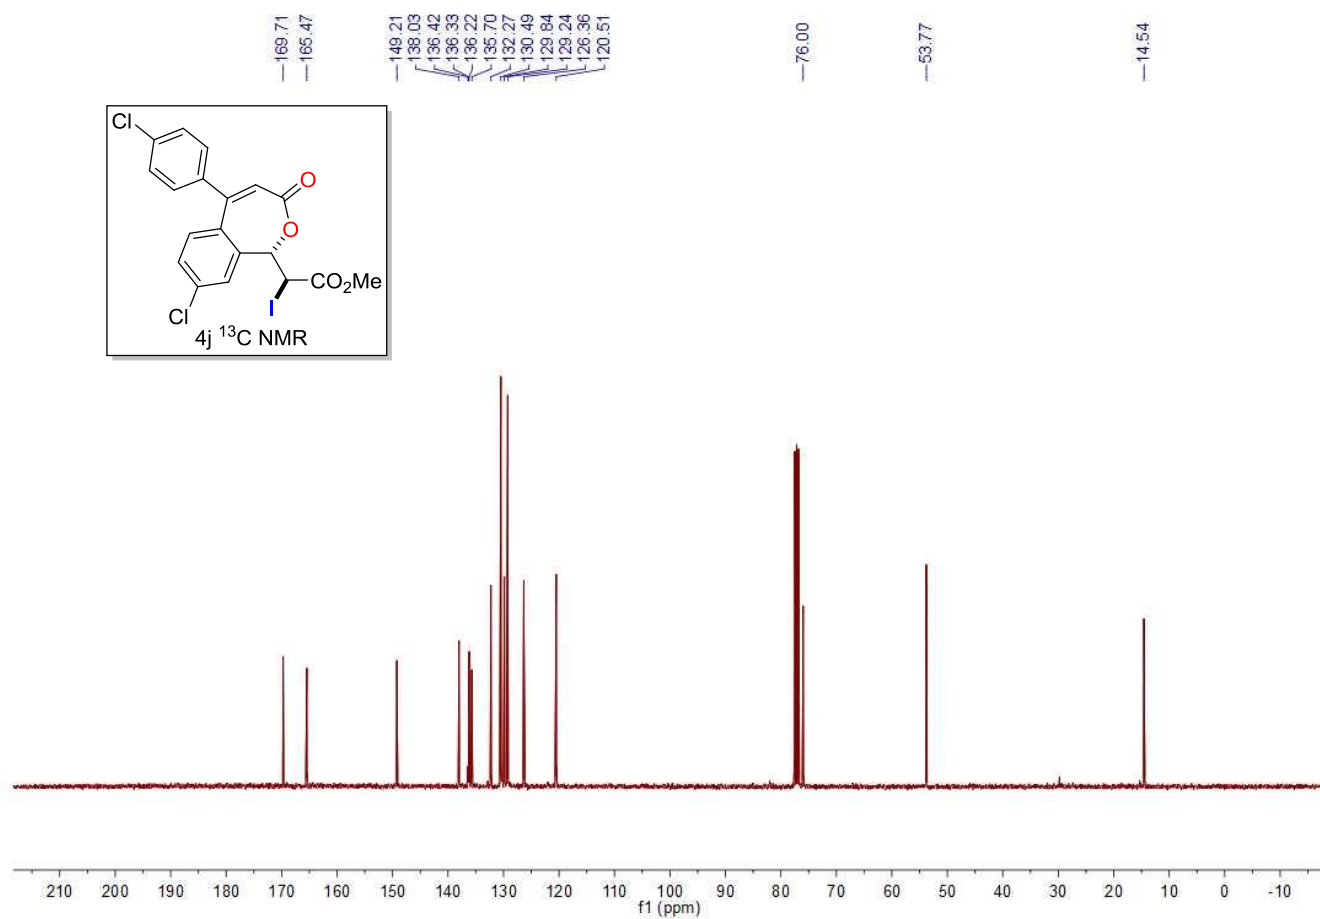

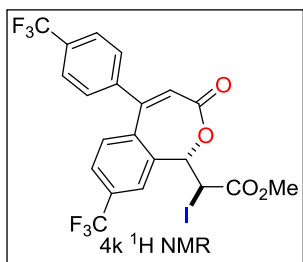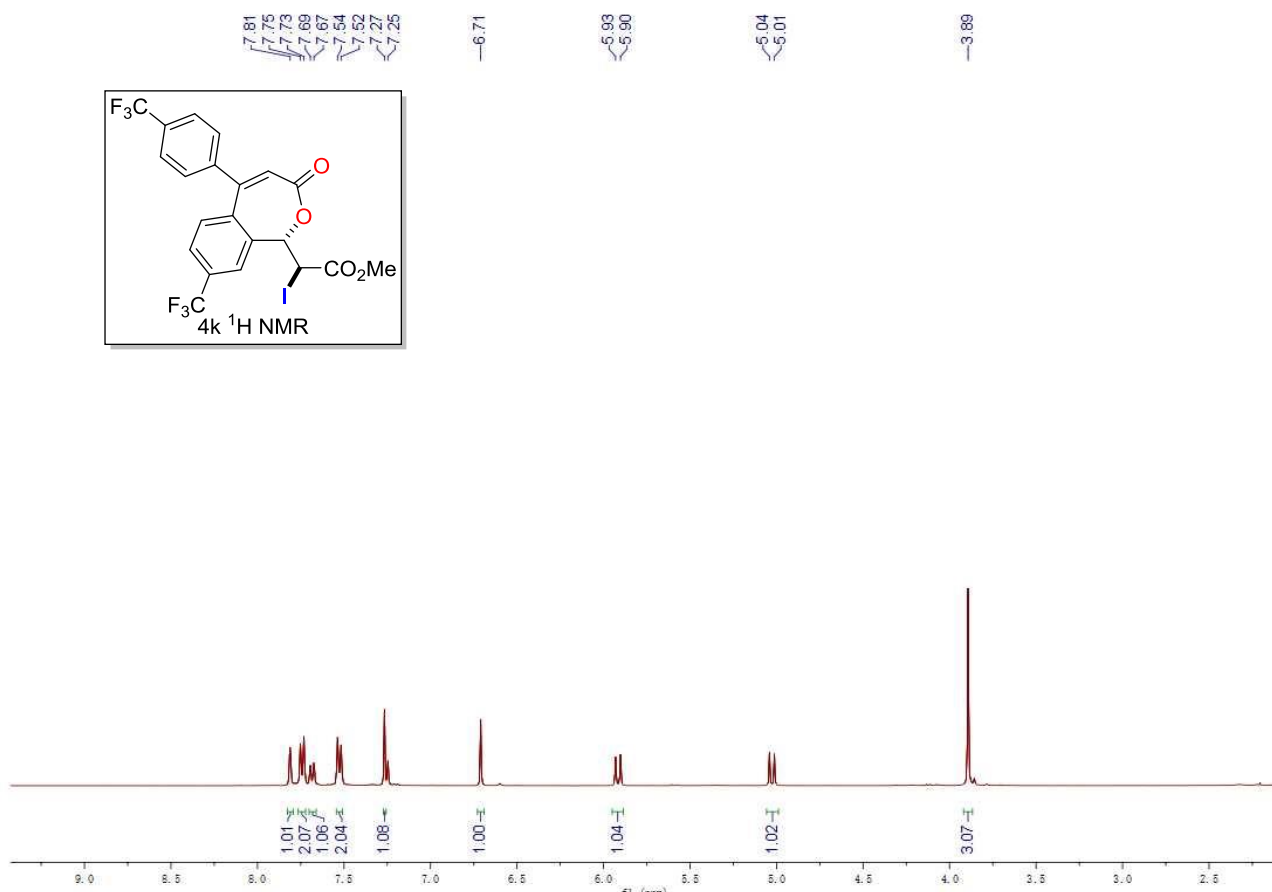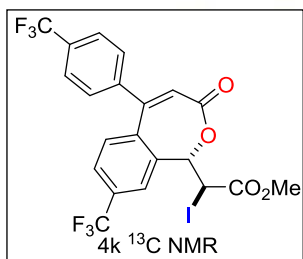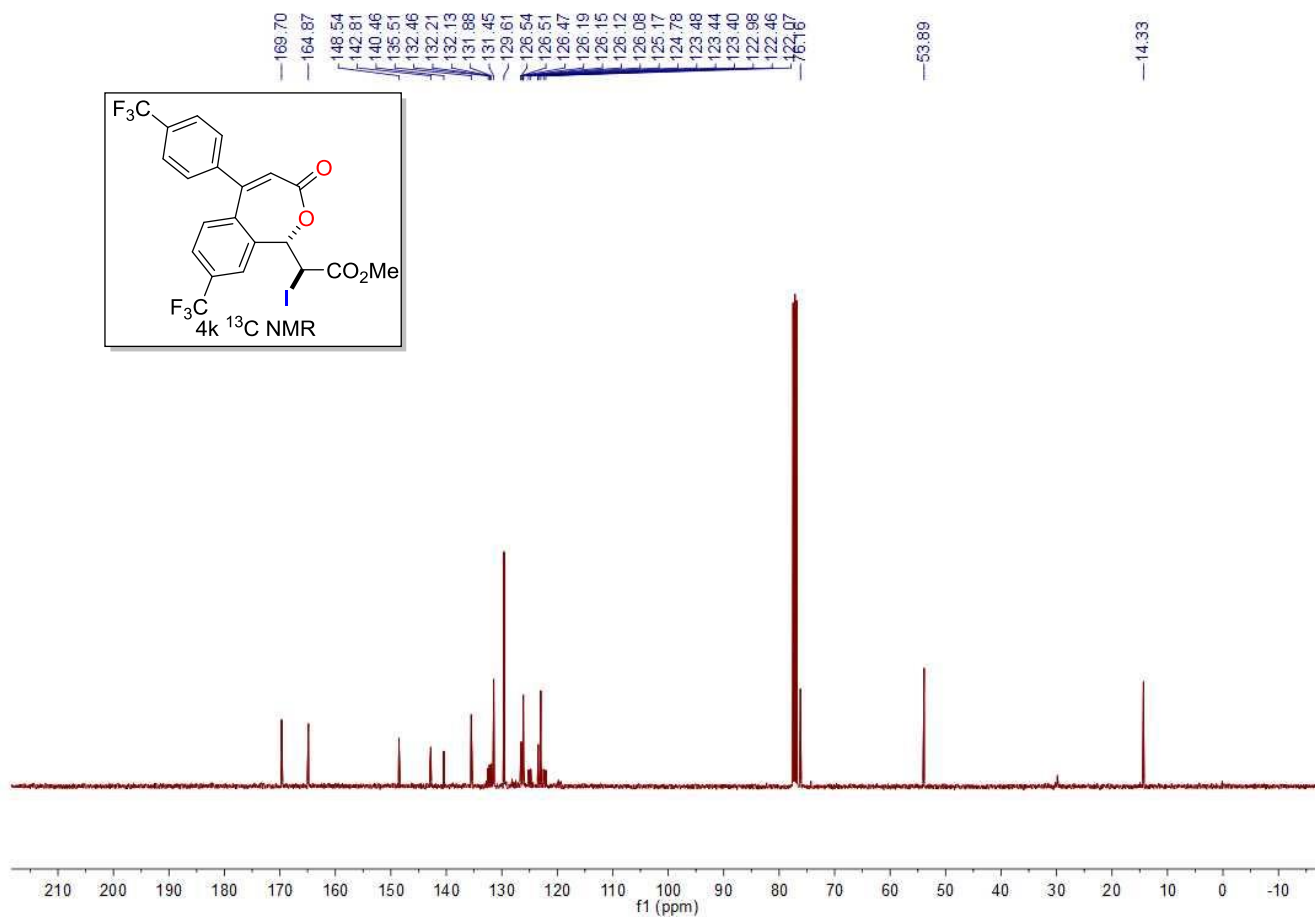

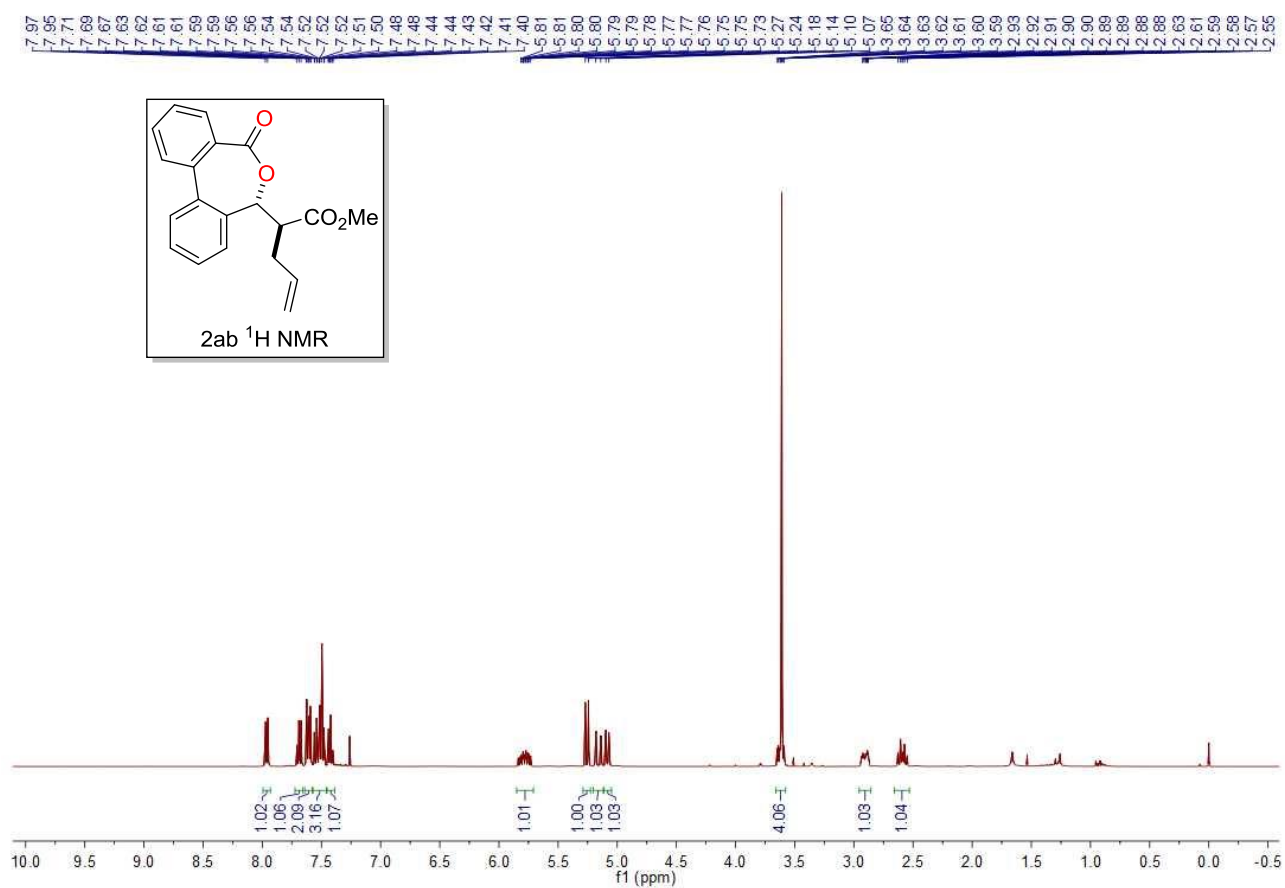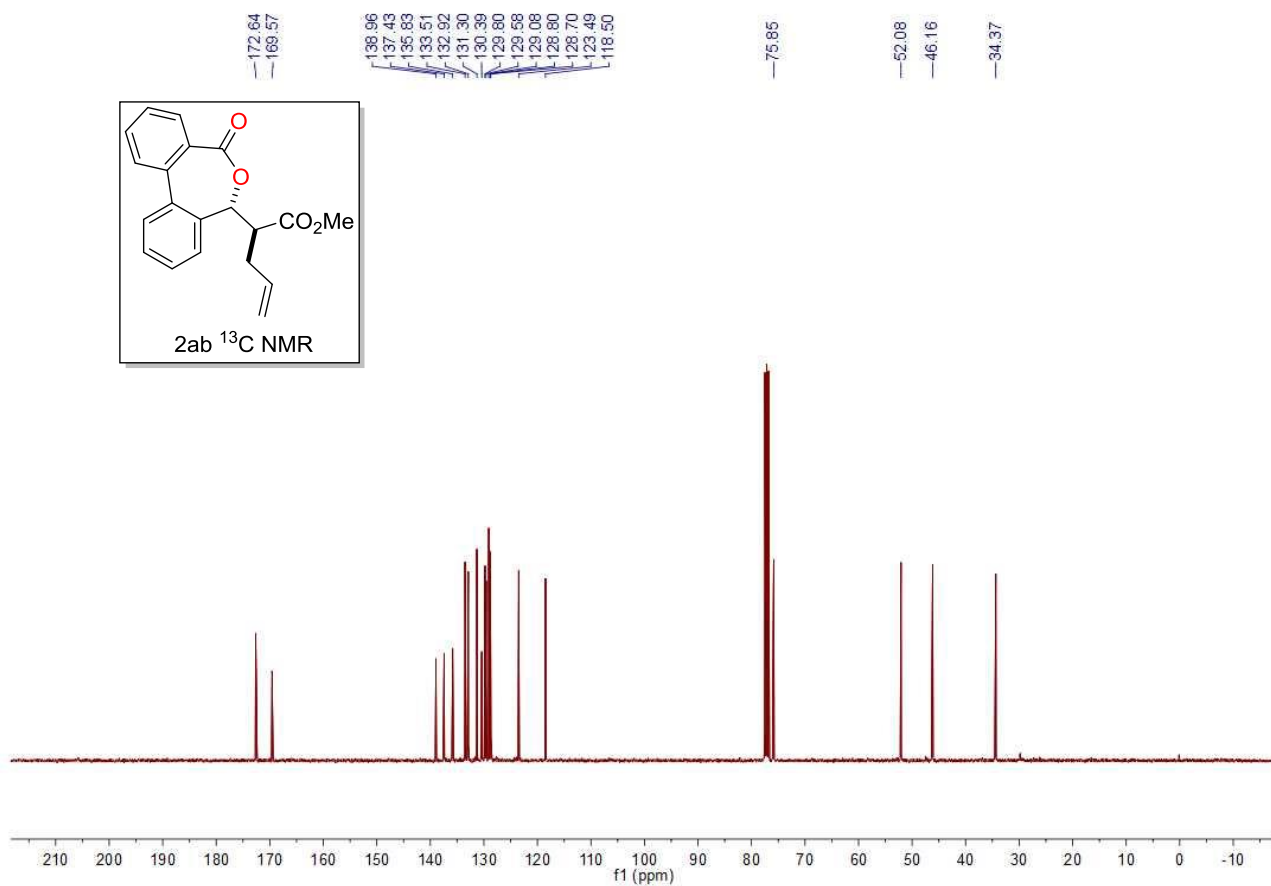

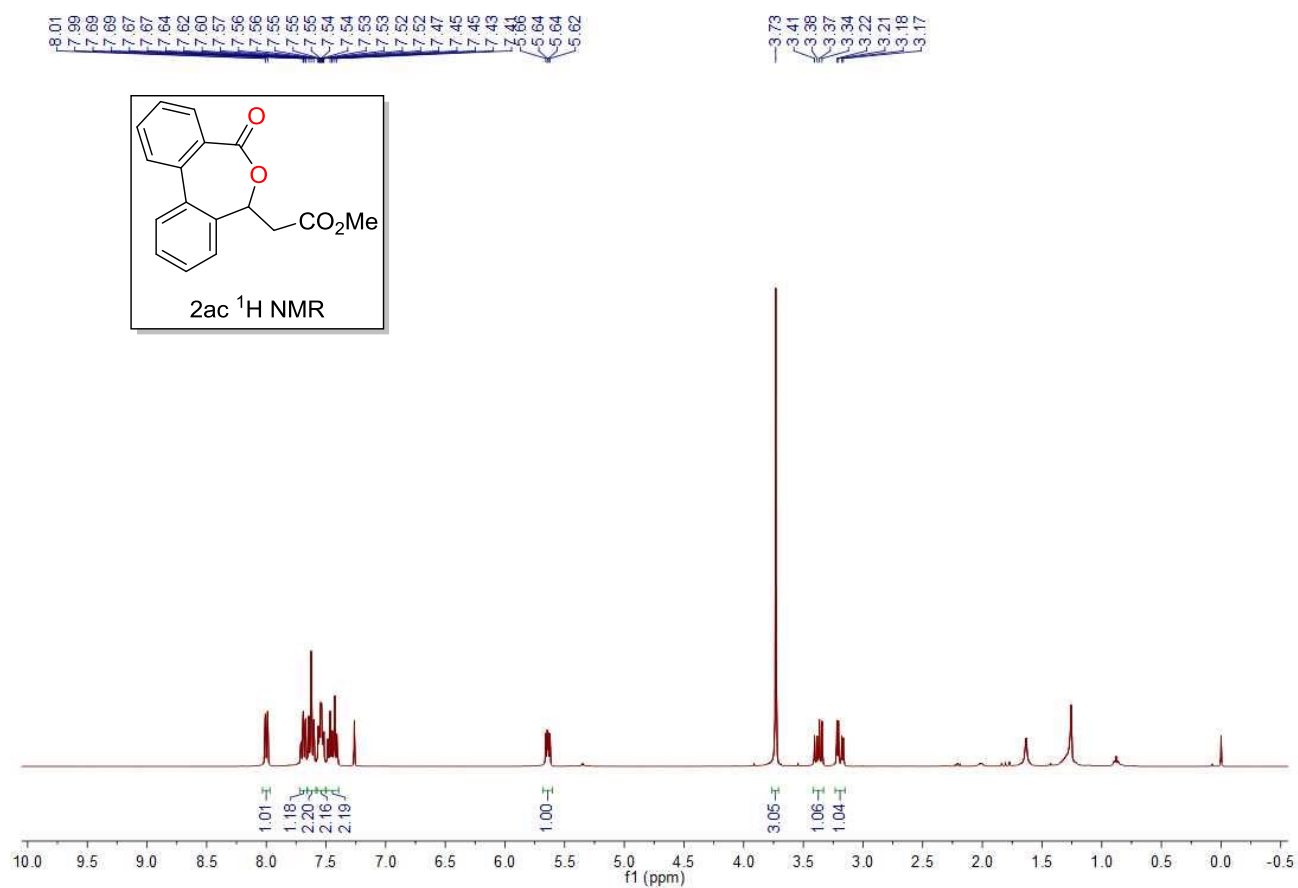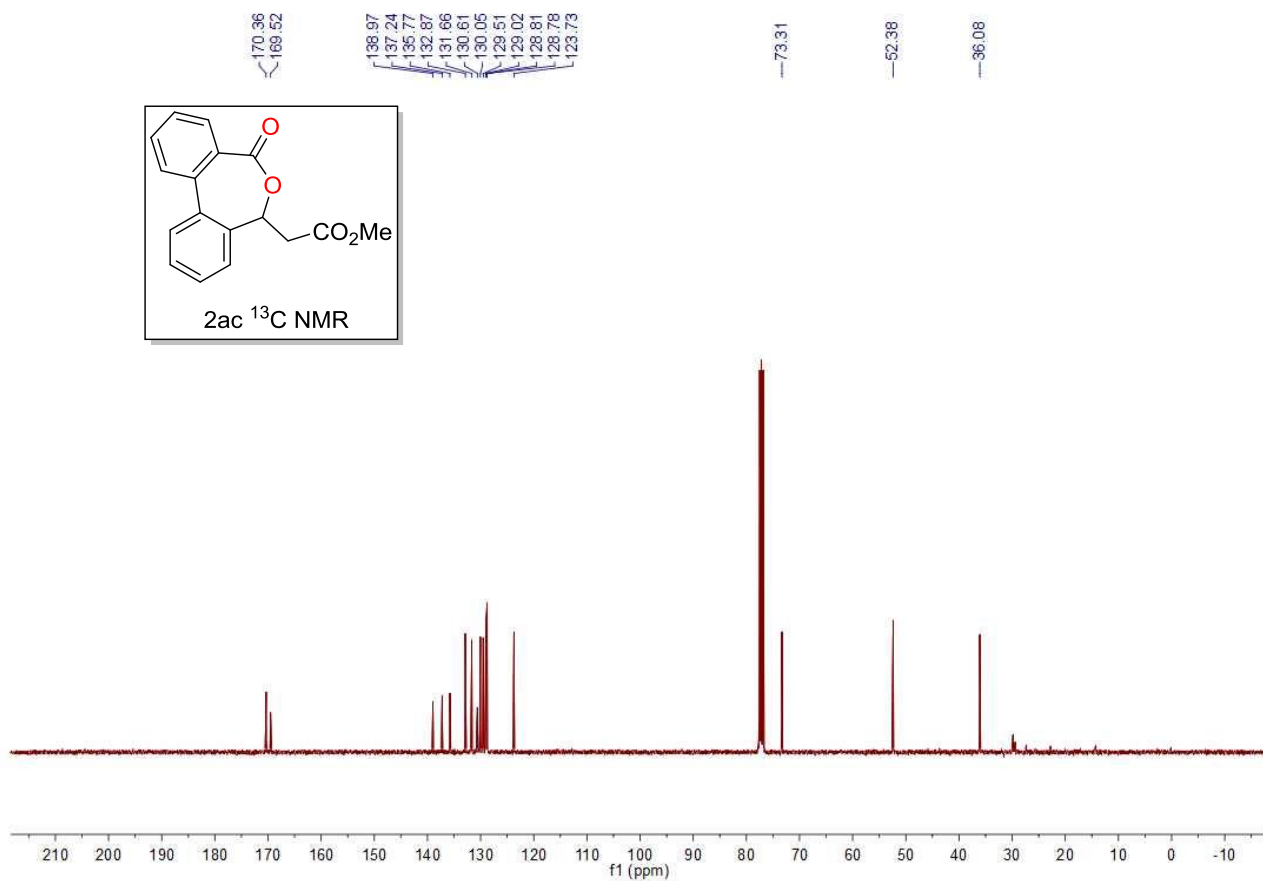

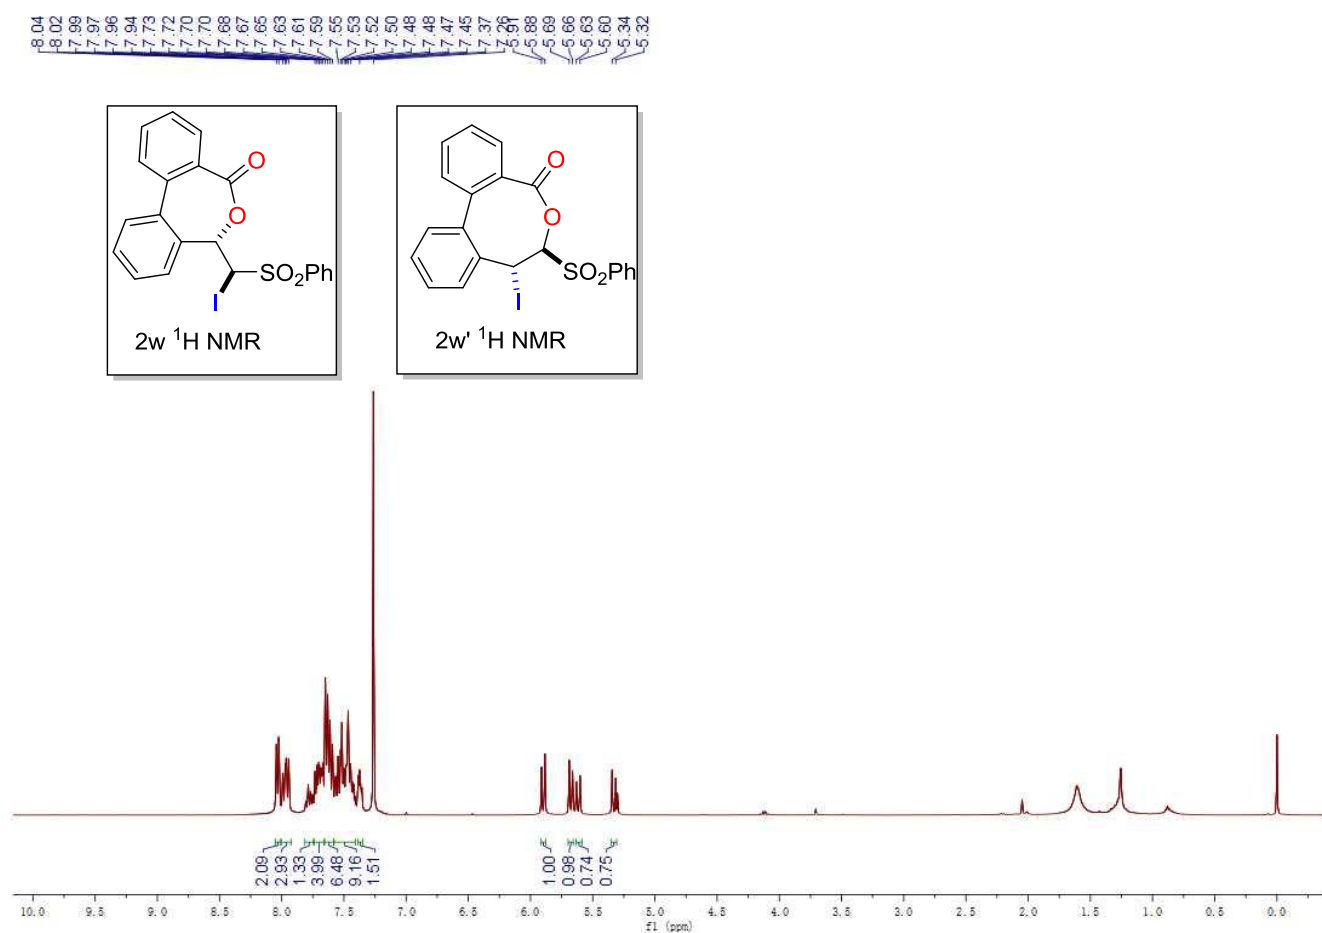

## 6. Crystallographic Data

X-ray data for 2a (CCDC 1918655)

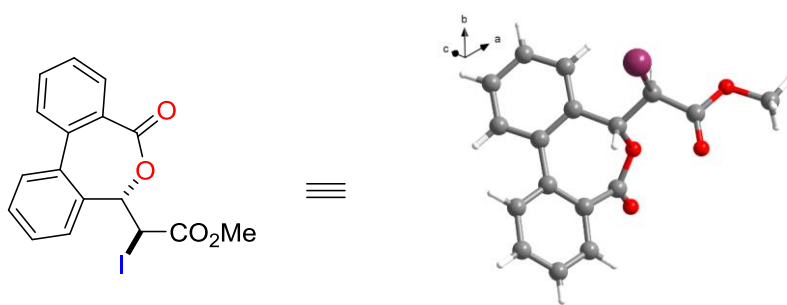

| compound       | 2a                                              |
|----------------|-------------------------------------------------|
| formula        | C <sub>17</sub> H <sub>13</sub> IO <sub>4</sub> |
| formula weight | 408.17                                          |
| <i>T</i> (K)   | 100.00(10)                                      |
| crystal system | triclinic                                       |
| space group    | <i>P</i> -1                                     |
| <i>a</i> (Å)   | 9.5534(3)                                       |
| <i>b</i> (Å)   | 9.6302(3)                                       |

|                                 |            |
|---------------------------------|------------|
| $c$ (Å)                         | 10.2451(2) |
| $\alpha$ (°)                    | 74.922(2)  |
| $\beta$ (°)                     | 85.722(2)  |
| $\gamma$ (°)                    | 61.931(3)  |
| $V$ (Å <sup>3</sup> )           | 801.80(4)  |
| $Z$                             | 2          |
| $D_c$ (g cm <sup>-3</sup> )     | 1.691      |
| $\mu$ (mm <sup>-1</sup> )       | 15.828     |
| reflns coll.                    | 16140      |
| unique reflns                   | 3261       |
| $R_{\text{int}}$                | 0.0586     |
| $^aR_I$ [ $I \geq 2\sigma(I)$ ] | 0.0378     |
| $^b wR_2$ (all data)            | 0.1075     |
| GOF                             | 1.081      |

$$^a R_I = \Sigma ||F_o| - |F_c|| / \Sigma |F_o|, \quad ^b wR_2 = [\Sigma w(F_o^2 - F_c^2)^2 / \Sigma w(F_o^2)^2]^{1/2}$$

### X-ray data for 2o (CCDC 1973725)

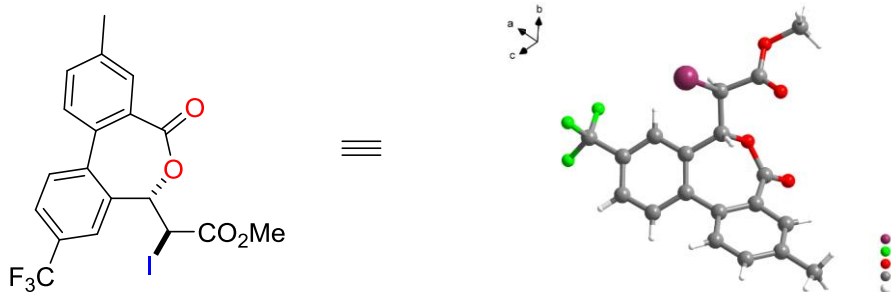

| compound                        | 2o                                                             |
|---------------------------------|----------------------------------------------------------------|
| formula                         | C <sub>19</sub> H <sub>14</sub> F <sub>3</sub> IO <sub>4</sub> |
| formula weight                  | 490.20                                                         |
| $T$ (K)                         | 99.99(10)                                                      |
| crystal system                  | monoclinic                                                     |
| space group                     | $Cc$                                                           |
| $a$ (Å)                         | 9.2645(2)                                                      |
| $b$ (Å)                         | 22.2327(6)                                                     |
| $c$ (Å)                         | 18.2492(5)                                                     |
| $\alpha$ (°)                    | 90                                                             |
| $\beta$ (°)                     | 101.504(3)                                                     |
| $\gamma$ (°)                    | 90                                                             |
| $V$ (Å <sup>3</sup> )           | 3683.36(17)                                                    |
| $Z$                             | 18                                                             |
| $D_c$ (g cm <sup>-3</sup> )     | 1.768                                                          |
| $\mu$ (mm <sup>-1</sup> )       | 1.790                                                          |
| reflns coll.                    | 28911                                                          |
| unique reflns                   | 8822                                                           |
| $R_{\text{int}}$                | 0.0755                                                         |
| $^aR_I$ [ $I \geq 2\sigma(I)$ ] | 0.0494                                                         |
| $^b wR_2$ (all data)            | 0.1251                                                         |
| GOF                             | 1.003                                                          |

$$^a R_I = \Sigma ||F_o| - |F_c|| / \Sigma |F_o|, \quad ^b wR_2 = [\Sigma w(F_o^2 - F_c^2)^2 / \Sigma w(F_o^2)^2]^{1/2}$$

### X-ray data for 2e (CCDC 1944538)

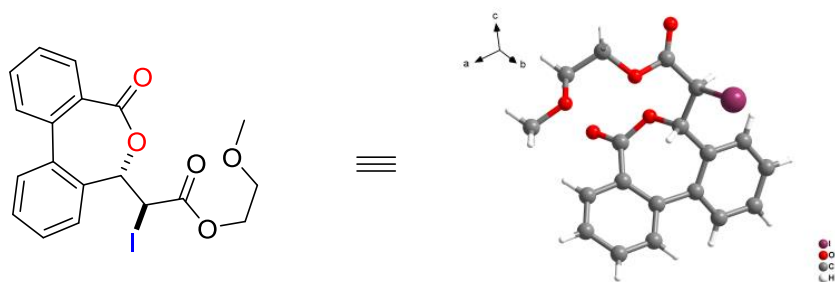

| compound                                                        | 2e                                              |
|-----------------------------------------------------------------|-------------------------------------------------|
| formula                                                         | C <sub>19</sub> H <sub>17</sub> IO <sub>5</sub> |
| formula weight                                                  | 452.22                                          |
| <i>T</i> (K)                                                    | 99.98(10)                                       |
| crystal system                                                  | triclinic                                       |
| space group                                                     | <i>P</i> -1                                     |
| <i>a</i> (Å)                                                    | 9.8357(2)                                       |
| <i>b</i> (Å)                                                    | 10.4353(3)                                      |
| <i>c</i> (Å)                                                    | 10.4634(3)                                      |
| $\alpha$ (°)                                                    | 111.642(2)                                      |
| $\beta$ (°)                                                     | 106.312(2)                                      |
| $\gamma$ (°)                                                    | 106.245(2)                                      |
| <i>V</i> (Å <sup>3</sup> )                                      | 865.10(4)                                       |
| <i>Z</i>                                                        | 2                                               |
| <i>D<sub>c</sub></i> (g cm <sup>-3</sup> )                      | 1.736                                           |
| $\mu$ (mm <sup>-1</sup> )                                       | 1.878                                           |
| reflns coll.                                                    | 13105                                           |
| unique reflns                                                   | 4297                                            |
| <i>R</i> <sub>int</sub>                                         | 0.0539                                          |
| <sup>a</sup> <i>R</i> <sub>I</sub> [ <i>I</i> ≥ 2σ( <i>I</i> )] | 0.0317                                          |
| <sup>b</sup> <i>wR</i> <sub>2</sub> (all data)                  | 0.0762                                          |
| GOF                                                             | 1.024                                           |

---

<sup>a</sup>*R*<sub>I</sub> =  $\Sigma||F_o| - |F_c||/\Sigma|F_o|$ , <sup>b</sup>*wR*<sub>2</sub> =  $[\Sigma w(F_o^2 - F_c^2)^2/\Sigma w(F_o^2)^2]^{1/2}$

#### X-ray data for 2i (CCDC 1944537)

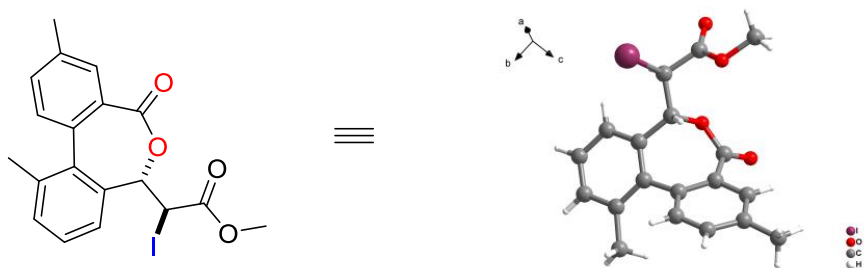

| compound       | 2i                                              |
|----------------|-------------------------------------------------|
| formula        | C <sub>19</sub> H <sub>17</sub> IO <sub>4</sub> |
| formula weight | 436.22                                          |
| <i>T</i> (K)   | 99.99(10)                                       |
| crystal system | monoclinic                                      |
| space group    | <i>P</i> 2 <sub>1</sub> - <i>n</i>              |

|                                                                 |             |
|-----------------------------------------------------------------|-------------|
| <i>a</i> (Å)                                                    | 10.5655(4)  |
| <i>b</i> (Å)                                                    | 14.9260(5)  |
| <i>c</i> (Å)                                                    | 11.4963(4)  |
| $\alpha$ (°)                                                    | 90          |
| $\beta$ (°)                                                     | 107.437(4)  |
| $\gamma$ (°)                                                    | 90          |
| <i>V</i> (Å <sup>3</sup> )                                      | 1729.66(11) |
| <i>Z</i>                                                        | 4           |
| <i>D<sub>c</sub></i> (g cm <sup>-3</sup> )                      | 1.675       |
| $\mu$ (mm <sup>-1</sup> )                                       | 1.871       |
| reflns coll.                                                    | 14543       |
| unique reflns                                                   | 4229        |
| <i>R</i> <sub>int</sub>                                         | 0.0467      |
| <sup>a</sup> <i>R</i> <sub>I</sub> [ <i>I</i> ≥ 2σ( <i>I</i> )] | 0.0363      |
| <sup>b</sup> <i>wR</i> <sub>2</sub> (all data)                  | 0.0900      |
| GOF                                                             | 1.048       |

$$^aR_I = \Sigma||F_o| - |F_c||/\Sigma|F_o|, ^b wR_2 = [\Sigma w(F_o^2 - F_c^2)^2/\Sigma w(F_o^2)^2]^{1/2}$$

### X-ray data for 2n (CCDC 1974644)

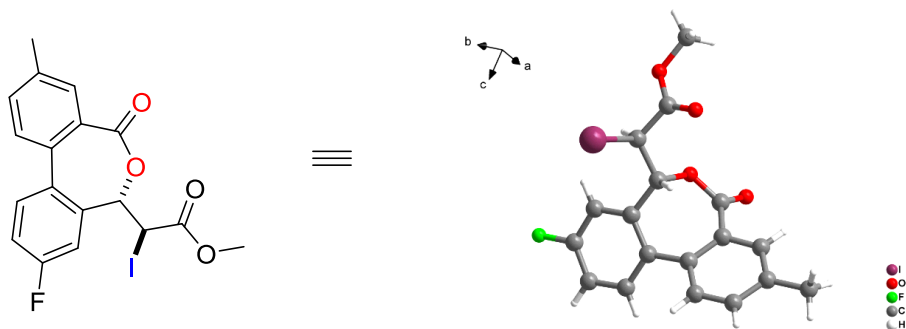

| compound                                                        | 2n                                                    |
|-----------------------------------------------------------------|-------------------------------------------------------|
| formula                                                         | C <sub>18</sub> H <sub>14</sub> FIO <sub>4</sub>      |
| formula weight                                                  | 440.19                                                |
| <i>T</i> (K)                                                    | 100.02(10)                                            |
| crystal system                                                  | orthorhombic                                          |
| space group                                                     | <i>P</i> 2 <sub>1</sub> 2 <sub>1</sub> 2 <sub>1</sub> |
| <i>a</i> (Å)                                                    | 8.7643(3)                                             |
| <i>b</i> (Å)                                                    | 9.1745(3)                                             |
| <i>c</i> (Å)                                                    | 20.1935(8)                                            |
| $\alpha$ (°)                                                    | 90                                                    |
| $\beta$ (°)                                                     | 90                                                    |
| $\gamma$ (°)                                                    | 90                                                    |
| <i>V</i> (Å <sup>3</sup> )                                      | 1623.72(10)                                           |
| <i>Z</i>                                                        | 4                                                     |
| <i>D<sub>c</sub></i> (g cm <sup>-3</sup> )                      | 1.801                                                 |
| $\mu$ (mm <sup>-1</sup> )                                       | 2.002                                                 |
| reflns coll.                                                    | 9747                                                  |
| unique reflns                                                   | 3767                                                  |
| <i>R</i> <sub>int</sub>                                         | 0.0460                                                |
| <sup>a</sup> <i>R</i> <sub>I</sub> [ <i>I</i> ≥ 2σ( <i>I</i> )] | 0.0333                                                |
| <sup>b</sup> <i>wR</i> <sub>2</sub> (all data)                  | 0.0597                                                |
| GOF                                                             | 1.021                                                 |

$$^aR_I = \Sigma||F_o| - |F_c||/\Sigma|F_o|, ^b wR_2 = [\Sigma w(F_o^2 - F_c^2)^2/\Sigma w(F_o^2)^2]^{1/2}$$



# X-ray data for 4a (CCDC 1944536)

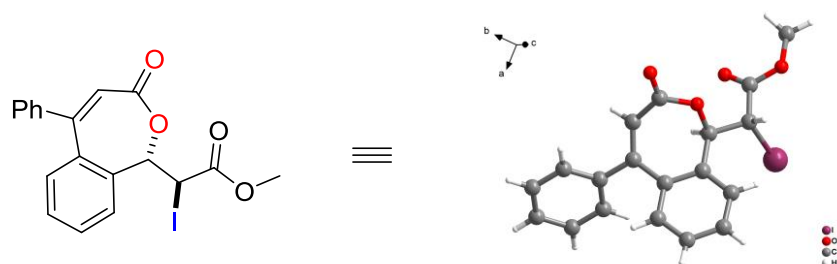

| compound                                                        | 4a                                              |
|-----------------------------------------------------------------|-------------------------------------------------|
| formula                                                         | C <sub>19</sub> H <sub>15</sub> IO <sub>4</sub> |
| formula weight                                                  | 434.21                                          |
| <i>T</i> (K)                                                    | 99.98(10)                                       |
| crystal system                                                  | monoclinic                                      |
| space group                                                     | <i>P</i> 2 <sub>1</sub> - <i>n</i>              |
| <i>a</i> (Å)                                                    | 8.09310(10)                                     |
| <i>b</i> (Å)                                                    | 13.1306(2)                                      |
| <i>c</i> (Å)                                                    | 15.5266(2)                                      |
| <i>α</i> (°)                                                    | 90                                              |
| <i>β</i> (°)                                                    | 95.488(2)                                       |
| <i>γ</i> (°)                                                    | 90                                              |
| <i>V</i> (Å <sup>3</sup> )                                      | 1642.41(4)                                      |
| <i>Z</i>                                                        | 4                                               |
| <i>D<sub>c</sub></i> (g cm <sup>-3</sup> )                      | 1.756                                           |
| <i>μ</i> (mm <sup>-1</sup> )                                    | 15.498                                          |
| reflns coll.                                                    | 9809                                            |
| unique reflns                                                   | 2932                                            |
| <i>R</i> <sub>int</sub>                                         | 0.0586                                          |
| <sup>a</sup> <i>R</i> <sub>I</sub> [ <i>I</i> ≥ 2σ( <i>I</i> )] | 0.0449                                          |
| <sup>b</sup> <i>wR</i> <sub>2</sub> (all data)                  | 0.1260                                          |
| GOF                                                             | 1.068                                           |

$$^aR_I = \Sigma||F_o| - |F_c||/\Sigma|F_o|, ^b wR_2 = [\Sigma w(F_o^2 - F_c^2)^2/\Sigma w(F_o^2)^2]^{1/2}$$
